# Supplementary material for: Type 1 piliated uropathogenic Escherichia coli hijack the host immune response by binding to CD14
Source: eLife. 2022 Jul 26;11:e78995. doi: 10.7554/eLife.78995 (PMC9359703; doi:10.7554/eLife.78995)
Supplement: Figure 1—figure supplement 1—source data 1. [file elife-78995-fig1-figsupp1-data1.xlsx]

## Sheet: panel C
Figure 1-figure supplement 1, panel C: percent mature DCs
DC	stimulation	Sample:	DCs/Single Cells/Q2: Pacific Blue-A+ . APC-A+ | Freq. of Parent
WT	CFT073 OFF	CFT073_OFF 1.fcs	95.5
WT	CFT073 OFF	CFT073_OFF 2.fcs	96.2
WT	CFT073 OFF	CFT073_OFF 3.fcs	95.9
WT	CFT073 ON	CFT073_ON 1.fcs	94.5
WT	CFT073 ON	CFT073_ON 2.fcs	92.1
WT	CFT073 ON	CFT073_ON 3.fcs	93
