# Supplementary material for: Type 1 piliated uropathogenic Escherichia coli hijack the host immune response by binding to CD14
Source: eLife. 2022 Jul 26;11:e78995. doi: 10.7554/eLife.78995 (PMC9359703; doi:10.7554/eLife.78995)
Supplement: Figure 1—figure supplement 1—source data 2. [file elife-78995-fig1-figsupp1-data2.xlsx]

## Sheet: panel D
Figure 1-figure supplement 1, panel D: MHCII expression
DC	stimulation	Sample:	DCs/Single Cells | Median (Pacific Blue-A)
WT	CFT073 OFF	CFT073_OFF 1.fcs	14709
WT	CFT073 OFF	CFT073_OFF 2.fcs	14245
WT	CFT073 OFF	CFT073_OFF 3.fcs	14855
WT	CFT073 ON	CFT073_ON 1.fcs	13560
WT	CFT073 ON	CFT073_ON 2.fcs	12876
WT	CFT073 ON	CFT073_ON 3.fcs	12687
