# Supplementary material for: Type 1 piliated uropathogenic Escherichia coli hijack the host immune response by binding to CD14
Source: eLife. 2022 Jul 26;11:e78995. doi: 10.7554/eLife.78995 (PMC9359703; doi:10.7554/eLife.78995)
Supplement: Figure 1—figure supplement 2—source data 1. [file elife-78995-fig1-figsupp2-data1.xlsx]

## Sheet: panel A
Figure1-figure supplement 2, panel A: growth rate and doubling time of ON and OFF UPEC
absorbence
	CFT073 ON			CFT073 OFF
Time [min]	1	2	3	1	2	3
0	0.04	0.039	0.039	0.039	0.039	0.04
59	0.041	0.043	0.04	0.04	0.041	0.041
118	0.047	0.047	0.047	0.048	0.048	0.048
150	0.06	0.059	0.058	0.063	0.062	0.063
181	0.073	0.072	0.071	0.073	0.071	0.072
212	0.103	0.096	0.096	0.111	0.108	0.108
269	0.23	0.228	0.251	0.224	0.228	0.278
329	0.394	0.391	0.399	0.415	0.406	0.395
409	0.509	0.485	0.514	0.479	0.48	0.507
normalized absorbence, path length corrected
	CFT073 ON			CFT073 OFF
Time [min]	1	2	3	1	2	3
0	0.0051	0	0	0	0	0.0051
59	0.0102	0.0204	0.0051	0.0051	0.0102	0.0102
118	0.0408	0.0408	0.0408	0.0459	0.0459	0.0459
150	0.1071	0.102	0.0969	0.1224	0.1173	0.1224
181	0.1734	0.1683	0.1632	0.1734	0.1632	0.1683
212	0.3264	0.2907	0.2907	0.3672	0.3519	0.3519
269	0.9741	0.9639	1.0812	0.9435	0.9639	1.2189
329	1.8105	1.7952	1.836	1.9176	1.8717	1.8156
409	2.397	2.2746	2.4225	2.244	2.2491	2.3868
doubling time [min]	34.197	39.5766	37.4671	28.8287	28.1509	29.3253
