# Supplementary material for: Type 1 piliated uropathogenic Escherichia coli hijack the host immune response by binding to CD14
Source: eLife. 2022 Jul 26;11:e78995. doi: 10.7554/eLife.78995 (PMC9359703; doi:10.7554/eLife.78995)
Supplement: Figure 1—figure supplement 2—source data 2. [file elife-78995-fig1-figsupp2-data2.xlsx]

## Sheet: panel B
Figure 1-figure supplement 2, panel B: MIC in R10H20 medium of ON and OFF UPEC
	ON			OFF
gentamicin [µg/ml]	1	2	3	1	2	3
5	0.051	0.051	0.05	0.052	0.05	0.05
2.5	0.051	0.052	0.05	0.05	0.051	0.053
1.25	0.075	0.207	0.056	0.07	0.103	0.087
0.625	0.405	0.414	0.395	0.389	0.383	0.392
0.3125	0.554	0.556	0.553	0.489	0.496	0.498
0.15625	0.64	0.651	0.648	0.564	0.564	0.569
0.078125	0.692	0.686	0.679	0.597	0.602	0.606
0	0.899	0.902	0.934	0.813	0.805	0.842
blank normalized	ON			OFF
gentamicin [µg/ml]	1	2	3	1	2	3
5	0.009	0.009	0.008	0.01	0.008	0.008
2.5	0.009	0.01	0.008	0.008	0.009	0.011
1.25	0.033	0.165	0.014	0.028	0.061	0.045
0.625	0.363	0.372	0.353	0.347	0.341	0.35
0.3125	0.512	0.514	0.511	0.447	0.454	0.456
0.15625	0.598	0.609	0.606	0.522	0.522	0.527
0.078125	0.65	0.644	0.637	0.555	0.56	0.564
0	0.857	0.86	0.892	0.771	0.763	0.8
MIC	ON			OFF
	1	2	3	1	2	3
gentamicin [µg/ml]	1.233	2.242	1.198	1.223	1.707	1.36
