# Supplementary material for: Type 1 piliated uropathogenic Escherichia coli hijack the host immune response by binding to CD14
Source: eLife. 2022 Jul 26;11:e78995. doi: 10.7554/eLife.78995 (PMC9359703; doi:10.7554/eLife.78995)
Supplement: Figure 1—source data 1. [file elife-78995-fig1-data1.xlsx]

## Sheet: Figure 1 panel E
Figure 1, panel E: in vitro T cell assay - T cell activation after contact with WT DCs
stimulus	Sample:	T cells/CD4 pos/Q1: PE-A- , APC-Cy7-A+ | Count	T cells/CD4 pos/Q1: PE-A- , APC-Cy7-A+ | Frequency of Parent
CFT073 OFF1	OFF OVA_C5_C05.fcs	14045	55.6
CFT073 OFF1	OFF OVA_C6_C06.fcs	11105	44.3
CFT073 OFF1	OFF OVA_C7_C07.fcs	9969	40.8
CFT073 ON1	ON OVA_C2_C02.fcs	5582	24
CFT073 ON1	ON OVA_C3_C03.fcs	4814	20.9
CFT073 ON1	ON OVA_C4_C04.fcs	5591	24.9
CFT073 ON2	WT 179 01 1_C2_C02.fcs	474	7.64
CFT073 ON2	WT 179 01 1_C3_C03.fcs	407	6.56
CFT073 ON3	WT 179 01 2_E2_E02.fcs	1417	6.14
CFT073 ON3	WT 179 01 2_E3_E03.fcs	1504	6.6
CFT073 ON4	WT 179 01 3_G2_G02.fcs	1740	9.82
CFT073 ON4	WT 179 01 3_G3_G03.fcs	1414	8.43
CFT073 OFF2	WT 180 01 1_C4_C04.fcs	5635	20.4
CFT073 OFF2	WT 180 01 1_C5_C05.fcs	5717	20.9
CFT073 OFF3	WT 180 01 2_E4_E04.fcs	4807	17.6
CFT073 OFF3	WT 180 01 2_E5_E05.fcs	4547	16
CFT073 OFF4	WT 180 01 3_G4_G04.fcs	3785	14
CFT073 OFF4	WT 180 01 3_G5_G05.fcs	4382	15.8
