# Supplementary material for: Type 1 piliated uropathogenic Escherichia coli hijack the host immune response by binding to CD14
Source: eLife. 2022 Jul 26;11:e78995. doi: 10.7554/eLife.78995 (PMC9359703; doi:10.7554/eLife.78995)
Supplement: Figure 1—source data 2. [file elife-78995-fig1-data2.xlsx]

## Sheet: Figure 1 panel F
Figure 2, panel F: in vitro T cell assay - T cells in division after contact with WT DCs
									number of devided cells per peak
Sample:	0	1	2	3	4	5	6		0	1	2	3	4	5	6		# cells at start	total number of division	# cells in division	stimulus
179 01_F5_F05.fcs	115	384	557	628	485	159			115	192	139.25	78.5	30.3125	4.96875			560.031	852.094	445.031	CFT073 ON1
179 01_F6_F06.fcs	138	222	310	342	165	105			138	111	77.5	42.75	10.3125	3.28125			382.844	451.906	244.844	CFT073 ON1
179 01_F7_F07.fcs	136	263	384	357	168	37			136	131.5	96	44.625	10.5	1.15625			419.781	505.156	283.781	CFT073 ON1
180 01_F8_F08.fcs	1024	4478	5113	4825	3215	1802			1024	2239	1278.25	603.125	200.938	56.3125			5401.62	7690.19	4377.62	CFT073 OFF1
180 01_F9_F09.fcs	945	5618	6818	7716	6944	6182			945	2809	1704.5	964.5	434	193.188			7050.19	11813.4	6105.19	CFT073 OFF1
180 01_F10_F10.fcs	986	4772	6022	5838	5294	4868			986	2386	1505.5	729.75	330.875	152.125			6090.25	9670.38	5104.25	CFT073 OFF1
OFF 0-1_C5_C05.fcs	2902	2665	5588	13829	17219	19633	25804		2902	1332.5	1397	1728.62	1076.19	613.531	403.188		9453.03	19103.9	6551.03	CFT073 OFF2
OFF 0-1_C6_C06.fcs	2799	2647	5654	12927	15983	18987	25278		2799	1323.5	1413.5	1615.88	998.938	593.344	394.969		9139.12	18330.4	6340.12	CFT073 OFF2
OFF 0-1_C7_C07.fcs	2497	2281	5362	10791	20294	19626	34099		2497	1140.5	1340.5	1348.88	1268.38	613.312	532.797		8741.36	19205	6244.36	CFT073 OFF2
ON 0-1_C2_C02.fcs	3093	973	1832	4831	6756	8965	15598		3093	486.5	458	603.875	422.25	280.156	243.719		5587.5	7766.22	2494.5	CFT073 ON2
ON 0-1_C3_C03.fcs	3709	1071	1996	4266	6459	7838	12392		3709	535.5	499	533.25	403.688	244.938	193.625		6119	7134.44	2410	CFT073 ON2
ON 0-1_C4_C04.fcs	3407	934	1935	4998	7180	9535	14675		3407	467	483.75	624.75	448.75	297.969	229.297		5958.52	7969.38	2551.52	CFT073 ON2
WT 179 01 2_E2_E02.fcs	1095	1871	1905	1090	367	154			1095	935.5	476.25	136.25	22.9375	4.8125			2670.75	257349	1575.75	CFT073 ON3
WT 179 01 2_E3_E03.fcs	1523	2185	2444	1625	756	218			1523	1092.5	611	203.125	47.25	6.8125			3483.69	312253	1960.69	CFT073 ON3
WT 179 01 3_G2_G02.fcs	1382	2397	2252	1431	629	235			1382	1198.5	563	178.875	39.3125	7.34375			3369.03	323780	1987.03	CFT073 ON4
WT 179 01 3_G3_G03.fcs	1593	3127	3629	2528	984	383			1593	1563.5	907.25	316	61.5	11.9688			4453.22	453256	2860.22	CFT073 ON4
WT 180 01 2_E4_E04.fcs	5285	10677	18983	25419	22021	18214			5285	5338.5	4745.75	3177.38	1376.31	569.188			20492.1	1.97981e+06	15207.1	CFT073 OFF3
WT 180 01 2_E5_E05.fcs	4449	9732	20032	27196	21489	18006			4449	4866	5008	3399.5	1343.06	562.688			19628.2	1.942e+06	15179.2	CFT073 OFF3
WT 180 01 3_G4_G04.fcs	4388	8880	17447	22999	18673	11667			4388	4440	4361.75	2874.88	1167.06	364.594			17596.3	1.72272e+06	13208.3	CFT073 OFF4
WT 180 01 3_G5_G05.fcs	4662	9453	18608	24942	21195	14951			4662	4726.5	4652	3117.75	1324.69	467.219			18950.2	1.8425e+06	14288.2	CFT073 OFF4
