# Supplementary material for: Type 1 piliated uropathogenic Escherichia coli hijack the host immune response by binding to CD14
Source: eLife. 2022 Jul 26;11:e78995. doi: 10.7554/eLife.78995 (PMC9359703; doi:10.7554/eLife.78995)
Supplement: Figure 1—source data 3. [file elife-78995-fig1-data3.xlsx]

## Sheet: Figure 1 panel G
Figure 1, panel G: co-stimulators on WT DCs
DC	co-stimulator	stimulus	Sample:	DCs/Single Cells | Median
WT	CD40	CFT073 ON	179_179 1.fcs	183
WT	CD40	CFT073 ON	179_179 2.fcs	192
WT	CD40	CFT073 ON	179_179 3.fcs	202
WT	CD40	CFT073 OFF	WT_180 1.fcs	728
WT	CD40	CFT073 OFF	WT_180 2.fcs	751
WT	CD40	CFT073 OFF	WT_180 3.fcs	779
WT	CD80	CFT073 ON	179_179 1.fcs	262
WT	CD80	CFT073 ON	179_179 2.fcs	352
WT	CD80	CFT073 ON	179_179 3.fcs	202
WT	CD80	CFT073 OFF	WT_180 1.fcs	492
WT	CD80	CFT073 OFF	WT_180 2.fcs	467
WT	CD80	CFT073 OFF	WT_180 3.fcs	489
WT	CD86	CFT073 ON	179_179 1.fcs	1602
WT	CD86	CFT073 ON	179_179 2.fcs	1625
WT	CD86	CFT073 ON	179_179 3.fcs	1148
WT	CD86	CFT073 OFF	WT_180 1.fcs	4705
WT	CD86	CFT073 OFF	WT_180 2.fcs	4548
WT	CD86	CFT073 OFF	WT_180 3.fcs	4786
