# Supplementary material for: Type 1 piliated uropathogenic Escherichia coli hijack the host immune response by binding to CD14
Source: eLife. 2022 Jul 26;11:e78995. doi: 10.7554/eLife.78995 (PMC9359703; doi:10.7554/eLife.78995)
Supplement: Figure 2—figure supplement 1—source data 1. [file elife-78995-fig2-figsupp1-data1.xlsx]

## Sheet: panel A
Figure 2-figure supplement 1, panel A: CD11b integrin expression of WT DCs after LPS and LPS + Mn treatment
DC	CD11b integrin	stimululs	sample	median	CD11b integrin activity (active/total)
WT	total	LPS	CD11b CD14_LPS1.fcs	1511
WT	total	LPS	CD11b CD14_LPS2.fcs	1480
WT	total	LPS	CD11b CD14_LPS3.fcs	1493
WT	total	LPS + Mn	CD11b CD14_Mn1.fcs	1405
WT	total	LPS + Mn	CD11b CD14_Mn2.fcs	1459
WT	total	LPS + Mn	CD11b CD14_Mn3.fcs	1405
WT	active	LPS	CD11b active_LPS1.fcs	123	0.081403
WT	active	LPS	CD11b active_LPS2.fcs	159	0.107432
WT	active	LPS	CD11b active_LPS3.fcs	159	0.106497
WT	active	LPS + Mn	CD11b active_Mn1.fcs	198	0.140925
WT	active	LPS + Mn	CD11b active_Mn2.fcs	228	0.156271
WT	active	LPS + Mn	CD11b active_Mn3.fcs	216	0.153737
