# Supplementary material for: Type 1 piliated uropathogenic Escherichia coli hijack the host immune response by binding to CD14
Source: eLife. 2022 Jul 26;11:e78995. doi: 10.7554/eLife.78995 (PMC9359703; doi:10.7554/eLife.78995)
Supplement: Figure 2—figure supplement 1—source data 2. [file elife-78995-fig2-figsupp1-data2.xlsx]

## Sheet: panel C
Figure 2-figure supplement 1, panel C: migration speed of adherent DCs
Global_ID	Genotype	xTotDis	yTotDis	EucDis	TotDis	myNSpeed
1_Results from OFF1 in µm per sec.csv_NA	Results from OFF1 in µm per sec.csv	12	-1	5.69567	334.077	0.0227324
1_Results from OFF2 in µm per sec.csv_NA	Results from OFF2 in µm per sec.csv	-54	-155	77.6369	119.403	0.0541093
1_Results from OFF3 in µm per sec.csv_NA	Results from OFF3 in µm per sec.csv	-79	-2	37.379	71.8589	0.00947459
1_Results from ON1 in µm per sec.csv_NA	Results from ON1 in µm per sec.csv	11	6	5.92667	31.5486	0.00262778
1_Results from ON2 in µm per sec.csv_NA	Results from ON2 in µm per sec.csv	3	5	2.75804	16.8345	0
1_Results from ON3 in µm per sec.csv_NA	Results from ON3 in µm per sec.csv	13	16	9.75114	114.493	0.00587589
11_Results from ON2 in µm per sec.csv_NA	Results from ON2 in µm per sec.csv	1	0	0.473	34.4076	0.00262778
14_Results from ON2 in µm per sec.csv_NA	Results from ON2 in µm per sec.csv	76	169	87.6481	145.399	0.00371624
2_Results from OFF2 in µm per sec.csv_NA	Results from OFF2 in µm per sec.csv	-244	-109	126.404	198.105	0.0131389
2_Results from OFF3 in µm per sec.csv_NA	Results from OFF3 in µm per sec.csv	-372	-70	179.044	285.425	0.0108346
2_Results from ON1 in µm per sec.csv_NA	Results from ON1 in µm per sec.csv	10	-9	6.36356	29.5435	0.00262778
3_Results from OFF2 in µm per sec.csv_NA	Results from OFF2 in µm per sec.csv	-174	-80	90.5841	117.584	0.0317516
3_Results from ON1 in µm per sec.csv_NA	Results from ON1 in µm per sec.csv	0	3	1.419	30.6008	0.00262778
3_Results from ON2 in µm per sec.csv_NA	Results from ON2 in µm per sec.csv	10	4	5.09437	49.3806	0.00262778
3_Results from ON3 in µm per sec.csv_NA	Results from ON3 in µm per sec.csv	-199	375	200.803	653.984	0.0401113
4_Results from OFF3 in µm per sec.csv_NA	Results from OFF3 in µm per sec.csv	-473	-34	224.306	307.498	0.0352553
4_Results from ON1 in µm per sec.csv_NA	Results from ON1 in µm per sec.csv	7	3	3.60226	34.7348	0.00262778
5_Results from OFF3 in µm per sec.csv_NA	Results from OFF3 in µm per sec.csv	-441	-63	210.711	223.232	0.0533699
5_Results from ON2 in µm per sec.csv_NA	Results from ON2 in µm per sec.csv	1	57	26.9651	45.7433	0
5_Results from ON3 in µm per sec.csv_NA	Results from ON3 in µm per sec.csv	23	63	31.7228	83.6915	0.00371624
7_Results from ON2 in µm per sec.csv_NA	Results from ON2 in µm per sec.csv	62	92	52.4753	340.341	0.0211858
7_Results from ON3 in µm per sec.csv_NA	Results from ON3 in µm per sec.csv	-5	-13	6.58813	63.8572	0.00371624
9_Results from ON2 in µm per sec.csv_NA	Results from ON2 in µm per sec.csv	43	87	45.9029	94.9171	0.00262778
9_Results from ON3 in µm per sec.csv_NA	Results from ON3 in µm per sec.csv	8	37	17.9054	94.5769	0.00525556
