# Supplementary material for: Type 1 piliated uropathogenic Escherichia coli hijack the host immune response by binding to CD14
Source: eLife. 2022 Jul 26;11:e78995. doi: 10.7554/eLife.78995 (PMC9359703; doi:10.7554/eLife.78995)
Supplement: Figure 2—figure supplement 1—source data 3. [file elife-78995-fig2-figsupp1-data3.xlsx]

## Sheet: panel D
Figure 2-figure supplement 1, panel D: beta1 integrin activity on WT and beta2 ko DCs
DC		stimulus	Sample:	DCs/Single Cells | Median (Phycoerythrin (PE)-A)	beta1 integrin activity (active/total)
WT	total	CFT073 OFF	beta 1 ON OFF_WT OFF 1.fcs	3234
WT	total	CFT073 OFF	beta 1 ON OFF_WT OFF 2.fcs	3329
WT	total	CFT073 OFF	beta 1 ON OFF_WT OFF 3.fcs	3337
WT	total	CFT073 ON	beta 1 ON OFF_WT ON 1.fcs	3104
WT	total	CFT073 ON	beta 1 ON OFF_WT ON 2.fcs	3226
WT	total	CFT073 ON	beta 1 ON OFF_WT ON 3.fcs	3187
beta 2 -/-	total	CFT073 OFF	beta 1 ON OFF_beta 2 OFF 1.fcs	2902
beta 2 -/-	total	CFT073 OFF	beta 1 ON OFF_beta 2 OFF 2.fcs	2958
beta 2 -/-	total	CFT073 OFF	beta 1 ON OFF_beta 2 OFF 3.fcs	3009
beta 2 -/-	total	CFT073 ON	beta 1 ON OFF_beta 2 ON 1.fcs	2443
beta 2 -/-	total	CFT073 ON	beta 1 ON OFF_beta 2 ON 2.fcs	2514
beta 2 -/-	total	CFT073 ON	beta 1 ON OFF_beta 2 ON 3.fcs	2490
WT	active	CFT073 OFF	active ON OFF 050221_WT OFF 1.fcs	82.8	0.025603
WT	active	CFT073 OFF	active ON OFF 050221_WT OFF 2.fcs	78.4	0.0235506
WT	active	CFT073 OFF	active ON OFF 050221_WT OFF 3.fcs	87.3	0.0261612
WT	active	CFT073 ON	active ON OFF 050221_WT ON 1.fcs	104	0.0335052
WT	active	CFT073 ON	active ON OFF 050221_WT ON 2.fcs	105	0.032548
WT	active	CFT073 ON	active ON OFF 050221_WT ON 3.fcs	106	0.0332601
beta 2 -/-	active	CFT073 OFF	active ON OFF 050221_beta 2 OFF 1.fcs	105	0.0361819
beta 2 -/-	active	CFT073 OFF	active ON OFF 050221_beta 2 OFF 2.fcs	102	0.0344828
beta 2 -/-	active	CFT073 OFF	active ON OFF 050221_beta 2 OFF 3.fcs	104	0.034563
beta 2 -/-	active	CFT073 ON	active ON OFF 050221_beta 2 ON 1.fcs	133	0.0544413
beta 2 -/-	active	CFT073 ON	active ON OFF 050221_beta 2 ON 2.fcs	136	0.0540971
beta 2 -/-	active	CFT073 ON	active ON OFF 050221_beta 2 ON 3.fcs	142	0.0570281
