# Supplementary material for: Type 1 piliated uropathogenic Escherichia coli hijack the host immune response by binding to CD14
Source: eLife. 2022 Jul 26;11:e78995. doi: 10.7554/eLife.78995 (PMC9359703; doi:10.7554/eLife.78995)
Supplement: Figure 2—figure supplement 1—source data 4. [file elife-78995-fig2-figsupp1-data4.xlsx]

## Sheet: panel E
Figure 2-figure supplement 1, panel E: migration in 3D collagen
	y displacement [pixel min -1]
time [min]	CFT073 ON			CFT073 OFF
0	-0.386	0.686	-0.389	1.495	0.169	0.551
3	0.155	0.009	0.517	1.106	0.036	-0.214
6	0.05	0.06	0.281	0.355	-0.045	0.044
9	0.395	0.221	0.275	0.208	0.457	0.484
12	0.162	0.192	0.312	0.183	0.407	0.704
15	0.334	0.244	0.402	0.324	0.468	-0.183
18	0.377	0.388	0.335	0.358	0.508	0.315
21	0.427	0.421	0.339	0.561	0.481	0.47
24	0.535	0.467	0.446	0.518	0.478	0.565
27	0.555	0.493	0.422	0.629	0.71	0.481
30	0.598	0.525	0.604	0.709	0.843	0.549
33	0.646	0.63	0.664	0.812	0.804	0.741
36	0.651	0.61	0.69	0.688	1.095	0.658
39	0.753	0.671	0.694	0.776	0.76	0.629
42	0.678	0.764	0.694	0.919	0.73	0.729
45	0.8	0.739	0.799	1.068	0.988	0.817
48	0.763	0.747	0.815	0.894	1.039	0.908
51	0.746	0.898	0.72	1.053	1.049	0.818
54	0.804	0.891	0.844	0.886	1.065	0.875
57	0.858	0.97	0.711	1.128	0.953	0.883
60	0.82	0.845	0.879	0.942	1.149	0.924
63	0.786	0.902	0.871	1.087	1.262	1.172
66	1.055	1.082	0.936	0.907	1.339	1.079
69	0.906	1.053	1.063	1.053	1.248	1.043
72	1.116	0.961	1.041	0.94	1.22	0.856
75	0.947	1.012	1.121	0.919	1.495	1.24
78	1.067	1.093	1.098	0.927	1.406	1.118
81	1.038	1.066	1.041	1.154	1.223	1.165
84	1.104	1.15	1.024	1.248	1.28	1.284
87	1.13	1.099	1.138	1.204	1.096	1.226
90	1.215	1.072	1.144	1.233	1.258	1.197
93	1.043	1.099	1.003	1.236	1.131	1.142
96	1.021	0.974	1.093	1.16	1.261	1.181
99	1.143	1.213	1.197	1.156	1.277	1.311
102	1.099	1.187	1.19	1.218	1.361	1.392
105	1.094	1.245	1.133	1.323	1.286	1.27
108	1.13	1.109	1.161	1.267	1.258	1.2
111	1.132	1.169	1.178	1.307	1.356	1.14
114	1.172	1.16	1.254	1.339	1.184	1.107
117	0.944	1.111	1.143	1.33	1.227	1.151
120	1.032	1.1	1.207	1.242	1.206	1.104
123	1.092	1.131	1.129	1.382	1.183	1.164
126	0.928	1.193	1.114	1.26	1.172	1.135
129	1.055	1.097	1.245	1.209	1.216	1.028
132	1.12	1.265	1.042	1.277	1.078	0.911
135	0.918	1.122	1.1	1.245	1.054	1.159
138	1.049	1.102	1.141	1.16	1.057	1.176
141	0.872	1.12	1.202	1.228	1.061	0.943
144	1.128	1.06	1.147	1.208	0.928	1.106
147	0.884	0.962	1.235	1.253	1.117	1.029
150	0.88	1.059	1.288	1.173	0.958	0.846
153	0.925	1.033	1.306	1.129	0.964	0.86
156	1.034	0.943	1.316	1.218	0.906	1.052
159	0.901	1.036	0.945	1.148	0.816	0.888
162	0.854	1.044	0.969	1.295	0.872	0.938
165	0.858	0.9	0.821	1.144	0.893	0.881
168	0.855	0.838	0.778	1.279	0.672	0.778
171	0.948	0.846	0.845	1.163	1.08	0.853
174	0.749	0.738	0.792	1.226	0.832	0.749
177	0.742	0.75	0.833	1.18	0.897	0.731
180	0.679	0.87	0.898	1.192	0.78	0.773
183	0.754	0.71	0.742	1.065	0.863	0.786
186	0.716	0.563	0.829	0.699	0.689	0.648
189	0.687	0.681	0.687	0.644	0.593	0.612
192	0.688	0.631	0.572	0.687	0.533	0.629
195	0.721	0.626	0.615	0.801	0.804	0.754
198	0.527	0.684	0.626	0.874	0.736	0.659
201	0.665	0.619	0.705	0.883	0.636	0.707
204	0.607	0.589	0.646	0.874	0.617	0.638
207	0.694	0.58	0.656	0.717	0.531	0.628
210	0.655	0.558	0.693	0.729	0.709	0.775
213	0.5	0.547	0.624	0.72	0.621	0.619
216	0.464	0.51	0.544	0.706	0.606	0.606
219	0.541	0.523	0.606	0.79	0.685	0.644
222	0.391	0.541	0.534	0.684	0.625	0.594
225	0.484	0.468	0.467	0.657	0.66	0.585
228	0.487	0.43	0.433	0.567	0.551	0.501
