# Supplementary material for: Type 1 piliated uropathogenic Escherichia coli hijack the host immune response by binding to CD14
Source: eLife. 2022 Jul 26;11:e78995. doi: 10.7554/eLife.78995 (PMC9359703; doi:10.7554/eLife.78995)
Supplement: Figure 2—source data 1. [file elife-78995-fig2-data1.xlsx]

## Sheet: panel A
Figure 2, panel A: DC-T cell contact times
contact time [min]
ON 1 no OVA	ON 2 no OVA	OFF 1 no OVA	OFF 2 no OVA	ON 1 OVA	ON 2 OVA	OFF 1 OVA	OFF 2 OVA
14.5	59.5	37	19.5	290	247.5	85.5	40
15.5	46.5	26	18.5	224.5	284.5	93.5	63
27	190.5	31	60.5	196	345.5	70.5	39
75	44.5	54.5	39	279	320.5	42.5	106
157.5	12	24	19	359.5	188.5	43	218
37.5	45.5	86	18	110	319	195	112.5
85.5	39.5	25.5	31	220.5	353	43	71.5
23.5	95	26	58	127	355	224.5	161.5
11	24.5		48.5	346.5	257.5	236	225.5
			70	181.5	291	56	20
				276.5	359.5	207	114.5
				316	197.5	134	59.5
				335.5	254.5	250.5	210.5
				359.5	346	136.5	27
				52	359.5	284	27
				274.5	325	56	161
				33	255.5		60
					359.5		202.5
					218
					279
