# Supplementary material for: Type 1 piliated uropathogenic Escherichia coli hijack the host immune response by binding to CD14
Source: eLife. 2022 Jul 26;11:e78995. doi: 10.7554/eLife.78995 (PMC9359703; doi:10.7554/eLife.78995)
Supplement: Figure 2—source data 2. [file elife-78995-fig2-data2.xlsx]

## Sheet: Figure 2 panel B
Figure 2, panel B: CD11b integrin staining of WT DCs
DC	CD11b integrin	stimulus	Sample:	DCs/Single Cells | Median	CD11b integrin activity (active/total)
WT	total	CFT073 ON	CD11b CD14_1791.fcs	1084
WT	total	CFT073 ON	CD11b CD14_1792.fcs	1043
WT	total	CFT073 ON	CD11b CD14_1793.fcs	984
WT	total	CFT073 OFF	CD11b CD14_1801.fcs	1127
WT	total	CFT073 OFF	CD11b CD14_1802.fcs	1220
WT	total	CFT073 OFF	CD11b CD14_1803.fcs	1148
WT	active	CFT073 ON	CD11b active_1791_001.fcs	309	0.285055
WT	active	CFT073 ON	CD11b active_1792_001.fcs	337	0.323106
WT	active	CFT073 ON	CD11b active_1793_001.fcs	341	0.346545
WT	active	CFT073 OFF	CD11b active_1801.fcs	139	0.123336
WT	active	CFT073 OFF	CD11b active_1802.fcs	117	0.0959016
WT	active	CFT073 OFF	CD11b active_1803.fcs	153	0.133275
