# Supplementary material for: Type 1 piliated uropathogenic Escherichia coli hijack the host immune response by binding to CD14
Source: eLife. 2022 Jul 26;11:e78995. doi: 10.7554/eLife.78995 (PMC9359703; doi:10.7554/eLife.78995)
Supplement: Figure 2—source data 3. [file elife-78995-fig2-data3.xlsx]

## Sheet: Figure 2 panel C
Figure 2, panel C: adhesion assay - fluorescent values
DC	CFT073 ON	CFT073 OFF
WT	1583	818
WT	1603	872
WT	1315	970
WT	1207	836
WT	1330	627
beta 2 -/-	1700	1539
beta 2 -/-	1542	1802
beta 2 -/-	1453	1980
beta 2 -/-	1960	1823
beta 2 -/-	2300	2109
