# Supplementary material for: Type 1 piliated uropathogenic Escherichia coli hijack the host immune response by binding to CD14
Source: eLife. 2022 Jul 26;11:e78995. doi: 10.7554/eLife.78995 (PMC9359703; doi:10.7554/eLife.78995)
Supplement: Figure 2—source data 4. [file elife-78995-fig2-data4.xlsx]

## Sheet: Figure 2 panel D
Figure 2, panel D: ECM migration assay - single cells outside of cell cluster
	ON	OFF
1	315	1030
2	264	711
3	116	756
