# Supplementary material for: Type 1 piliated uropathogenic Escherichia coli hijack the host immune response by binding to CD14
Source: eLife. 2022 Jul 26;11:e78995. doi: 10.7554/eLife.78995 (PMC9359703; doi:10.7554/eLife.78995)
Supplement: Figure 2—source data 5. [file elife-78995-fig2-data5.xlsx]

## Sheet: Figure 2 panel E
Figure 2, panel E: ear crawl out assay
genotype	replicate #	image number	treatment	in	out	in/out
WT	1	312	ON	2.147	3.341	0.642622
WT	1	314	ON	10.307	8.794	1.17205
WT	1	321	ON	9.4	7.407	1.26907
WT	2	331	ON	8.029	7.266	1.10501
WT	2	326	ON	1.341	1.175	1.14128
WT	2	335	ON	8.997	5.8	1.55121
WT	3	211	ON	10.945	6.401	1.70989
WT	3	215	ON	4.27	4.205	1.01546
WT	1	309	OFF	15.147	8.172	1.85352
WT	1	310	OFF	8.996	5.55	1.6209
WT	2	342	OFF	7.588	4.728	1.60491
WT	2	341	OFF	11.896	6.053	1.96531
WT	3	205	OFF	14.307	4.526	3.16107
WT	3	303	OFF	8.009	3.145	2.54658
WT	3	12	OFF	19.054	7.088	2.68821
beta 2 -/-	1	86	ON	11.631	3.89	2.98997
beta 2 -/-	1	87	ON	17.314	9.4	1.84191
beta 2 -/-	2	89	ON	5.052	2.213	2.28287
beta 2 -/-	2	91	ON	4.253	1.734	2.45271
beta 2 -/-	3	93	ON	5.097	1.978	2.57685
beta 2 -/-	3	94	ON	10.031	3.6	2.78639
beta 2 -/-	1	105	OFF	5.573	1.786	3.12038
beta 2 -/-	1	108	OFF	3.395	1.999	1.69835
beta 2 -/-	1	109	OFF	7.699	3.96	1.94419
beta 2 -/-	2	110	OFF	6.434	2.26	2.8469
beta 2 -/-	2	113	OFF	4.587	1.585	2.89401
beta 2 -/-	3	118	OFF	9.63	4.147	2.32216
beta 2 -/-	3	119	OFF	4.171	2.769	1.50632
