# Supplementary material for: Type 1 piliated uropathogenic Escherichia coli hijack the host immune response by binding to CD14
Source: eLife. 2022 Jul 26;11:e78995. doi: 10.7554/eLife.78995 (PMC9359703; doi:10.7554/eLife.78995)
Supplement: Figure 2—source data 6. [file elife-78995-fig2-data6.xlsx]

## Sheet: Figure 2 panel F
Figure 2, panel F: co-stimulators on beta 2 ko DCs
DC	co-stimulator	stimulus	Sample:	DCs/Single Cells | Median
beta 2 -/-	CD40	CFT073 ON	beta 2_179 1.fcs	225
beta 2 -/-	CD40	CFT073 ON	beta 2_179 2.fcs	222
beta 2 -/-	CD40	CFT073 ON	beta 2_179 3.fcs	239
beta 2 -/-	CD40	CFT073 OFF	beta 2_180 1.fcs	409
beta 2 -/-	CD40	CFT073 OFF	beta 2_180 2.fcs	444
beta 2 -/-	CD40	CFT073 OFF	beta 2_180 3.fcs	436
beta 2 -/-	CD80	CFT073 ON	beta 2_179 1.fcs	221
beta 2 -/-	CD80	CFT073 ON	beta 2_179 2.fcs	197
beta 2 -/-	CD80	CFT073 ON	beta 2_179 3.fcs	201
beta 2 -/-	CD80	CFT073 OFF	beta 2_180 1.fcs	377
beta 2 -/-	CD80	CFT073 OFF	beta 2_180 2.fcs	366
beta 2 -/-	CD80	CFT073 OFF	beta 2_180 3.fcs	429
beta 2 -/-	CD86	CFT073 ON	MHCII CD86_1791.fcs	4198
beta 2 -/-	CD86	CFT073 ON	MHCII CD86_1792.fcs	4581
beta 2 -/-	CD86	CFT073 ON	MHCII CD86_1793.fcs	4504
beta 2 -/-	CD86	CFT073 OFF	MHCII CD86_1801.fcs	6571
beta 2 -/-	CD86	CFT073 OFF	MHCII CD86_1802.fcs	6587
beta 2 -/-	CD86	CFT073 OFF	MHCII CD86_1803.fcs	6555
