# Supplementary material for: Type 1 piliated uropathogenic Escherichia coli hijack the host immune response by binding to CD14
Source: eLife. 2022 Jul 26;11:e78995. doi: 10.7554/eLife.78995 (PMC9359703; doi:10.7554/eLife.78995)
Supplement: Figure 2—source data 7. [file elife-78995-fig2-data7.xlsx]

## Sheet: Figure 2 panel G
Figure 2, panel G: in vitro T cell assay - T cells in division after contact with beta 2 ko DCs
									number of devided cells per peak
Sample:	0	1	2	3	4	5			0	1	2	3	4	5			# cells at start	total number of division	# cells in division	stimulus
01-OFF-D5.fcs	510	555	585	496	512	401			510	277.5	146.25	62	32	12.5312			1040.28	103420	530.281	OFF1
01-OFF-D6.fcs	474	552	735	604	499	288			474	276	183.75	75.5	31.1875	9			1049.44	109255	575.438	OFF1
01-OFF-D7.fcs	600	612	744	597	525	341			600	306	186	74.625	32.8125	10.6562			1210.09	117928	610.094	OFF1
01-OFF-E5.fcs	638	656	890	945	887	655			638	328	222.5	118.125	55.4375	20.4688			1382.53	132915	744.531	OFF2
01-OFF-E6.fcs	488	571	727	739	730	411			488	285.5	181.75	92.375	45.625	12.8438			1106.09	113155	618.094	OFF2
01-OFF-E7.fcs	836	1011	1245	1535	1837	1364			836	505.5	311.25	191.875	114.812	42.625			2002.06	201901	1166.06	OFF2
01-OFF-F5.fcs	453	496	637	550	538	318			453	248	159.25	68.75	33.625	9.9375			972.562	97573.3	519.562	OFF3
01-OFF-F6.fcs	678	478	467	277	222	157			678	239	116.75	34.625	13.875	4.90625			1087.16	86049.4	409.156	OFF3
01-OFF-F7.fcs	628	662	760	842	798	1073			628	331	190	105.25	49.875	33.5312			1337.66	128182	709.656	OFF3
01-ON-A5.fcs	259	156	156	98	116	107			259	78	39	12.25	7.25	3.34375			398.844	28382.2	139.844	ON1
01-ON-A6.fcs	213	131	168	98	127	163			213	65.5	42	12.25	7.9375	5.09375			345.781	25396.1	132.781	ON1
01-ON-A7.fcs	138	83	65	27	61	45			138	41.5	16.25	3.375	3.8125	1.40625			204.344	14241.7	66.3438	ON1
01-ON-B5.fcs	96	47	29	21	49	55			96	23.5	7.25	2.625	3.0625	1.71875			134.156	7863.85	38.1562	ON2
01-ON-B6.fcs	92	52	38	43	41	45			92	26	9.5	5.375	2.5625	1.40625			136.844	9037.25	44.8438	ON2
01-ON-B7.fcs	115	75	56	38	46	53			115	37.5	14	4.75	2.875	1.65625			175.781	12861	60.7812	ON2
01-ON-C5.fcs	70	47	33	32	57	68			70	23.5	8.25	4	3.5625	2.125			111.438	8116.44	41.4375	ON3
01-ON-C6.fcs	97	45	52	36	54	58			97	22.5	13	4.5	3.375	1.8125			142.188	8554.71	45.1875	ON3
01-ON-C7.fcs	95	66	38	22	37	89			95	33	9.5	2.75	2.3125	2.78125			145.344	10826.2	50.3438	ON3
