# Supplementary material for: Type 1 piliated uropathogenic Escherichia coli hijack the host immune response by binding to CD14
Source: eLife. 2022 Jul 26;11:e78995. doi: 10.7554/eLife.78995 (PMC9359703; doi:10.7554/eLife.78995)
Supplement: Figure 3—figure supplement 1—source data 1. [file elife-78995-fig3-figsupp1-data1.xlsx]

## Sheet: panel G
Figure 3-figure supplement 1, panel G: cytokine array - TLR4-dependent cytokines from cd14 ko DCs
normalized signal intensity	ON 1	ON 2	ON 3	OFF 1	OFF 2	OFF 3
IL-6	31836.3	40710	37152.5	42815.9	41039	45535.2
CCL5	62327.5	62133.4	61779.7	62099.5	62240.3	61393.1
TNF-alpha	3902.3	5579.18	2902.85	3801.9	4780.54	3023.67
