# Supplementary material for: Type 1 piliated uropathogenic Escherichia coli hijack the host immune response by binding to CD14
Source: eLife. 2022 Jul 26;11:e78995. doi: 10.7554/eLife.78995 (PMC9359703; doi:10.7554/eLife.78995)
Supplement: Figure 3—figure supplement 1—source data 2. [file elife-78995-fig3-figsupp1-data2.xlsx]

## Sheet: panel H
Figure 3-figure supplement 1, panel H: Interferon-alpha 1 ELISA
	ON 1	ON 2	ON 3	OFF 1	OFF 2	OFF 3
pg/ml	0	0	0	0	0	0
