# Supplementary material for: Type 1 piliated uropathogenic Escherichia coli hijack the host immune response by binding to CD14
Source: eLife. 2022 Jul 26;11:e78995. doi: 10.7554/eLife.78995 (PMC9359703; doi:10.7554/eLife.78995)
Supplement: Figure 3—source data 1. [file elife-78995-fig3-data1.xlsx]

## Sheet: Figure 3 panel A
Figure 3, panel A: adhesion assay tlr4 ko DCs - fluorescent values
CFT073 ON	CFT073 OFF
1405	719
1176	566
1188	527
1249	814
1100	910
