# Supplementary material for: Type 1 piliated uropathogenic Escherichia coli hijack the host immune response by binding to CD14
Source: eLife. 2022 Jul 26;11:e78995. doi: 10.7554/eLife.78995 (PMC9359703; doi:10.7554/eLife.78995)
Supplement: Figure 3—source data 2. [file elife-78995-fig3-data2.xlsx]

## Sheet: Figure 3 panel B
Figure 3, panel B: ear crawl out assay tlr4 ko mice
replicate	number	treatment	in	out	in/out
1	42	ON	27.516	19.388	1.41923
1	43	ON	25.265	17.908	1.41082
2	48	ON	12.539	12.3535	1.01502
2	49	ON	17.261	14.701	1.17414
1	50	ON	7.602	7.704	0.98676
1	44	OFF	36.538	10.595	3.44861
1	45	OFF	24.747	10.292	2.40449
1	46	OFF	26.19	11.567	2.2642
2	49 2	OFF	12.846	6.472	1.98486
2	51	OFF	29.689	13.003	2.28324
