# Supplementary material for: Type 1 piliated uropathogenic Escherichia coli hijack the host immune response by binding to CD14
Source: eLife. 2022 Jul 26;11:e78995. doi: 10.7554/eLife.78995 (PMC9359703; doi:10.7554/eLife.78995)
Supplement: Figure 3—source data 3. [file elife-78995-fig3-data3.xlsx]

## Sheet: Figure 3 panel C
Figure 3, panel C: co-stimulators on tlr4 ko DCs
DC	co-stimulator	stimulus	Sample:	DCs/Single Cells | Median
TLR4 -/-	CD40	CFT073 ON	TLR4_1791.fcs	429
TLR4 -/-	CD40	CFT073 ON	TLR4_1792.fcs	736
TLR4 -/-	CD40	CFT073 ON	TLR4_1793.fcs	628
TLR4 -/-	CD40	CFT073 OFF	TLR4_1801.fcs	624
TLR4 -/-	CD40	CFT073 OFF	TLR4_1802.fcs	669
TLR4 -/-	CD40	CFT073 OFF	TLR4_1803.fcs	594
TLR4 -/-	CD80	CFT073 ON	TLR4_1791.fcs	324
TLR4 -/-	CD80	CFT073 ON	TLR4_1792.fcs	392
TLR4 -/-	CD80	CFT073 ON	TLR4_1793.fcs	347
TLR4 -/-	CD80	CFT073 OFF	TLR4_1801.fcs	518
TLR4 -/-	CD80	CFT073 OFF	TLR4_1802.fcs	479
TLR4 -/-	CD80	CFT073 OFF	TLR4_1803.fcs	467
TLR4 -/-	CD86	CFT073 ON	TLR4_1791.fcs	1668
TLR4 -/-	CD86	CFT073 ON	TLR4_1792.fcs	1055
TLR4 -/-	CD86	CFT073 ON	TLR4_1793.fcs	1138
TLR4 -/-	CD86	CFT073 OFF	TLR4_1801.fcs	2766
TLR4 -/-	CD86	CFT073 OFF	TLR4_1802.fcs	2649
TLR4 -/-	CD86	CFT073 OFF	TLR4_1803.fcs	2048
