# Supplementary material for: Type 1 piliated uropathogenic Escherichia coli hijack the host immune response by binding to CD14
Source: eLife. 2022 Jul 26;11:e78995. doi: 10.7554/eLife.78995 (PMC9359703; doi:10.7554/eLife.78995)
Supplement: Figure 3—source data 5. [file elife-78995-fig3-data5.xlsx]

## Sheet: Figure 3 panel E
Figure 3, panel E: ear crawl out assay cd14 ko mice
replicate	number	treatment	in	out	in/out
3	38	ON	15.823	8.82	1.79399
3	41	ON	17.52	6.26	2.79872
2	37	ON	12.197	4.686	2.60286
2	35	ON	18.304	7.151	2.55964
1	30	ON	15.116	5.865	2.57732
1	29	ON	12.475	7.69	1.62224
1	224	OFF	60.118	35.257	1.70514
1	225	OFF	6.882	3.136	2.19452
2	234	OFF	13.309	6.106	2.17966
3	238	OFF	8.186	3.872	2.11415
3	237	OFF	13.222	4.322	3.05923
2	235	OFF	13.008	4.386	2.9658
