# Supplementary material for: Type 1 piliated uropathogenic Escherichia coli hijack the host immune response by binding to CD14
Source: eLife. 2022 Jul 26;11:e78995. doi: 10.7554/eLife.78995 (PMC9359703; doi:10.7554/eLife.78995)
Supplement: Figure 3—source data 6. [file elife-78995-fig3-data6.xlsx]

## Sheet: Figure 3 panel F
Figure 3, panel F: co-stimulators on cd14 ko DCs
DC	co-stimulator	stimulus	Sample:	DCs/Single Cells | Median
CD14 -/-	CD40	CFT073 ON	CD14_179 1.fcs	356
CD14 -/-	CD40	CFT073 ON	CD14_179 2.fcs	357
CD14 -/-	CD40	CFT073 ON	CD14_179 3.fcs	388
CD14 -/-	CD40	CFT073 OFF	CD14_180 1.fcs	513
CD14 -/-	CD40	CFT073 OFF	CD14_180 2.fcs	557
CD14 -/-	CD40	CFT073 OFF	CD14_180 3.fcs	558
CD14 -/-	CD80	CFT073 ON	CD14_179 1.fcs	480
CD14 -/-	CD80	CFT073 ON	CD14_179 2.fcs	463
CD14 -/-	CD80	CFT073 ON	CD14_179 3.fcs	491
CD14 -/-	CD80	CFT073 OFF	CD14_180 1.fcs	509
CD14 -/-	CD80	CFT073 OFF	CD14_180 2.fcs	526
CD14 -/-	CD80	CFT073 OFF	CD14_180 3.fcs	516
CD14 -/-	CD86	CFT073 ON	CD14 CD86_2_179 1.fcs	6032
CD14 -/-	CD86	CFT073 ON	CD14 CD86_2_179 2.fcs	3923
CD14 -/-	CD86	CFT073 ON	CD14 CD86_2_179 3.fcs	5037
CD14 -/-	CD86	CFT073 OFF	CD14 CD86_2_180 1.fcs	6684
CD14 -/-	CD86	CFT073 OFF	CD14 CD86_2_180 2.fcs	7573
CD14 -/-	CD86	CFT073 OFF	CD14 CD86_2_180 3.fcs	7818
