# Supplementary material for: Type 1 piliated uropathogenic Escherichia coli hijack the host immune response by binding to CD14
Source: eLife. 2022 Jul 26;11:e78995. doi: 10.7554/eLife.78995 (PMC9359703; doi:10.7554/eLife.78995)
Supplement: Figure 3—source data 7. [file elife-78995-fig3-data7.xlsx]

## Sheet: Figure 3 panel G
Figure 3, panel G: cytokine array - TLR4-dependent cytokines
normalized signal intensity	ON 1	ON 2	ON 3	OFF 1	OFF 2	OFF 3
IL-6	47943.6	46492.8	48506.3	47690.6	50885.8	44528.5
CCL5	61812.4	61543.6	66367.3	62170.1	61463	61290.2
TNF-alpha	5844.88	3780.97	5365.43	2670.46	4521.29	4850.17
