# Supplementary material for: Type 1 piliated uropathogenic Escherichia coli hijack the host immune response by binding to CD14
Source: eLife. 2022 Jul 26;11:e78995. doi: 10.7554/eLife.78995 (PMC9359703; doi:10.7554/eLife.78995)
Supplement: Figure 3—source data 8. [file elife-78995-fig3-data8.xlsx]

## Sheet: Figure 3 panel H
Figure 3, panel H: receptor endocytosis - median fluorescence and normalized fluorescence
median CD14	CFT073 ON			CFT073 OFF				normalized CD14	CFT073 ON			CFT073 OFF
time [min]	1	2	3	1	2	3		time [min]	1	2	3	1	2	3
0	469	486	509	469	486	509		0	1	1	1	1	1	1
30	398	380	387	402	364	337		30	0.815574	0.778689	0.793033	0.82377	0.745902	0.690574
60	345	313	291	327	319	278		60	0.706967	0.641393	0.596311	0.670082	0.653689	0.569672
120	892	457	767	696	541	671		120	1.82787	0.936475	1.57172	1.42623	1.10861	1.375
median CD64	CFT073 ON			CFT073 OFF				normalized CD64	CFT073 ON			CFT073 OFF
time [min]	1	2	3	1	2	3		time [min]	1	2	3	1	2	3
0	136	116	106	136	116	106		0	1	1	1	1	1	1
30	126	135	124	122	120	109		30	1.05587	1.13128	1.03911	1.02235	1.00559	0.913408
60	116	113	119	118	114	103		60	0.972067	0.946927	0.997207	0.988827	0.955307	0.863128
120	126	145	132	125	129	116		120	1.05587	1.21508	1.10615	1.04749	1.08101	0.972067
