# Supplementary material for: Type 1 piliated uropathogenic Escherichia coli hijack the host immune response by binding to CD14
Source: eLife. 2022 Jul 26;11:e78995. doi: 10.7554/eLife.78995 (PMC9359703; doi:10.7554/eLife.78995)
Supplement: Figure 3—source data 9. [file elife-78995-fig3-data9.xlsx]

## Sheet: Figure 3 panel I
Figure 3, panel I: CD11b integrin staining of cd14 ko DCs
DC	CD11b integrin	stimulus	Sample:	DCs/Single Cells | Median	CD11b integrin activity (active/total)
cd14 null	total	CFT073 ON	CD14 CD11b CD86_179 1.fcs	2923
cd14 null	total	CFT073 ON	CD14 CD11b CD86_179 2.fcs	2833
cd14 null	total	CFT073 ON	CD14 CD11b CD86_179 3.fcs	2574
cd14 null	total	CFT073 OFF	CD14 CD11b CD86_180 1.fcs	3801
cd14 null	total	CFT073 OFF	CD14 CD11b CD86_180 2.fcs	3932
cd14 null	total	CFT073 OFF	CD14 CD11b CD86_180 3.fcs	3820
cd14 null	active	CFT073 ON	CD14 CD11b active_1791.fcs	158	0.0540541
cd14 null	active	CFT073 ON	CD14 CD11b active_1792.fcs	175	0.061772
cd14 null	active	CFT073 ON	CD14 CD11b active_1793.fcs	181	0.0703186
cd14 null	active	CFT073 OFF	CD14 CD11b active_1801.fcs	111	0.0292028
cd14 null	active	CFT073 OFF	CD14 CD11b active_1802.fcs	129	0.0328077
cd14 null	active	CFT073 OFF	CD14 CD11b active_1803.fcs	139	0.0363874
