# Supplementary material for: Type 1 piliated uropathogenic Escherichia coli hijack the host immune response by binding to CD14
Source: eLife. 2022 Jul 26;11:e78995. doi: 10.7554/eLife.78995 (PMC9359703; doi:10.7554/eLife.78995)
Supplement: Figure 4—source data 1. [file elife-78995-fig4-data1.xlsx]

## Sheet: panel C
Figure 4, panel C: bead-binding assay - fluorescent events inside bacteria gate
stimulus	file name	fluorescent counts in bacteria gate
beads only	271120_unlabelled 1.fcs	923
beads only	271120_unlabelled 2.fcs	1184
beads only	271120_unlabelled 3.fcs	1256
uncoupled beads ON	271120_no CD14 VG003 1.fcs	2240
uncoupled beads ON	271120_no CD14 VG003 2.fcs	2002
uncoupled beads ON	271120_no CD14 VG003 3.fcs	1853
CD14 coupled beads ON	271120_VG003 1.fcs	9450
CD14 coupled beads ON	271120_VG003 2.fcs	9362
CD14 coupled beads ON	271120_VG003 3.fcs	9348
CD14 coupled beads ON dfimH	271120_KT 257 3.fcs	1491
CD14 coupled beads ON dfimH	271120_KT257 1.fcs	1263
CD14 coupled beads ON dfimH	271120_KT257 2.fcs	2810
