# Supplementary material for: Type 1 piliated uropathogenic Escherichia coli hijack the host immune response by binding to CD14
Source: eLife. 2022 Jul 26;11:e78995. doi: 10.7554/eLife.78995 (PMC9359703; doi:10.7554/eLife.78995)
Supplement: Figure 4—source data 2. [file elife-78995-fig4-data2.xlsx]

## Sheet: panel E
Figure 4, panel E: adhesion assay of WT DCs - fluorescent values
CFT073 ON	CFT073 ON ΔfimH
1583	643
1603	679
1315	609
1207	705
1330	628
