# Supplementary material for: Type 1 piliated uropathogenic Escherichia coli hijack the host immune response by binding to CD14
Source: eLife. 2022 Jul 26;11:e78995. doi: 10.7554/eLife.78995 (PMC9359703; doi:10.7554/eLife.78995)
Supplement: Figure 4—source data 3. [file elife-78995-fig4-data3.xlsx]

## Sheet: panel F
Figure 4, panel F: co-stimulators on WT DCs
DC	co-stimulator	stimulus	Sample:	DCs/Single Cells | Median
WT	CD40	CFT073 ON	179_179 1.fcs	183
WT	CD40	CFT073 ON	179_179 2.fcs	192
WT	CD40	CFT073 ON	179_179 3.fcs	202
WT	CD40	CFT073 ON dfimH	WT fim mutants_193 1.fcs	500
WT	CD40	CFT073 ON dfimH	WT fim mutants_193 2.fcs	511
WT	CD40	CFT073 ON dfimH	WT fim mutants_193 3.fcs	514
WT	CD80	CFT073 ON	179_179 1.fcs	262
WT	CD80	CFT073 ON	179_179 2.fcs	352
WT	CD80	CFT073 ON	179_179 3.fcs	202
WT	CD80	CFT073 ON dfimH	WT fim mutants_193 1.fcs	648
WT	CD80	CFT073 ON dfimH	WT fim mutants_193 2.fcs	685
WT	CD80	CFT073 ON dfimH	WT fim mutants_193 3.fcs	679
WT	CD86	CFT073 ON	179_179 1.fcs	1602
WT	CD86	CFT073 ON	179_179 2.fcs	1625
WT	CD86	CFT073 ON	179_179 3.fcs	1148
WT	CD86	CFT073 ON dfimH	WT fim mutants_193 1.fcs	5916
WT	CD86	CFT073 ON dfimH	WT fim mutants_193 2.fcs	6334
WT	CD86	CFT073 ON dfimH	WT fim mutants_193 3.fcs	5930
