# Supplementary material for: Type 1 piliated uropathogenic Escherichia coli hijack the host immune response by binding to CD14
Source: eLife. 2022 Jul 26;11:e78995. doi: 10.7554/eLife.78995 (PMC9359703; doi:10.7554/eLife.78995)
Supplement: Figure 4—source data 4. [file elife-78995-fig4-data4.xlsx]

## Sheet: panel G
Figure 4, panel G: co-stimulators on WT DCs
DC	co-stimulator	stimulus	Sample:	DCs/Single Cells | Median
WT	CD40	CFT073 ON	179_179 1.fcs	183
WT	CD40	CFT073 ON	179_179 2.fcs	192
WT	CD40	CFT073 ON	179_179 3.fcs	202
WT	CD40	CFT073 ON + FK605	WT FK605_179 1.fcs	307
WT	CD40	CFT073 ON + FK605	WT FK605_179 2.fcs	318
WT	CD40	CFT073 ON + FK605	WT FK605_179 3.fcs	301
WT	CD80	CFT073 ON	179_179 1.fcs	262
WT	CD80	CFT073 ON	179_179 2.fcs	352
WT	CD80	CFT073 ON	179_179 3.fcs	202
WT	CD80	CFT073 ON + FK605	WT FK605_179 1.fcs	494
WT	CD80	CFT073 ON + FK605	WT FK605_179 2.fcs	473
WT	CD80	CFT073 ON + FK605	WT FK605_179 3.fcs	478
WT	CD86	CFT073 ON	179_179 1.fcs	1602
WT	CD86	CFT073 ON	179_179 2.fcs	1625
WT	CD86	CFT073 ON	179_179 3.fcs	1148
WT	CD86	CFT073 ON + FK605	WT FK605_179 1.fcs	4375
WT	CD86	CFT073 ON + FK605	WT FK605_179 2.fcs	5037
WT	CD86	CFT073 ON + FK605	WT FK605_179 3.fcs	4786
