# Supplementary material for: Type 1 piliated uropathogenic Escherichia coli hijack the host immune response by binding to CD14
Source: eLife. 2022 Jul 26;11:e78995. doi: 10.7554/eLife.78995 (PMC9359703; doi:10.7554/eLife.78995)
Supplement: Figure 4—source data 5. [file elife-78995-fig4-data5.xlsx]

## Sheet: panel H
Figure 4, panel H: cytokine array - NFAT-dependent cytokines
	WT						cd14 ko						WT+FK506
normalized signal intensity	ON 1	ON 2	ON 3	OFF 1	OFF 2	OFF 3	ON 1	ON 2	ON 3	OFF 1	OFF 2	OFF 3	ON 1	ON 2	ON 3	OFF 1	OFF 2	OFF 3
GM-CSF	5653.17	7455.22	6970.33	2708.37	4104.71	3767.47	3123.88	3350.66	3242.02	2702.56	3485.87	2622.05	5942.68	5495.79	5074.08	5737.36	4435.71	4020.67
IL-2	3236.83	3312.8	3918.3	2087.13	2827.3	3198.16	2361.77	2819.25	2433.27	2112.76	2322.5	2065.3	5618.89	3941.12	4645.25	4509.47	3455.17	4217.25
IL-3	2073.58	2789.79	2895.9	1491.42	1128.49	1157.26	1745.33	1879.16	1451.2	1251.58	1329.96	1484.33	3473.35	1640.03	2613.41	3866.85	1630.95	2684.35
IL-4	6209.83	5580.86	6773.24	3532.94	3968.32	4352.82	5138.17	5277.68	4066.69	6297.57	5656	4190.1	7588.68	8168.56	6891.51	8613.86	7246.84	6935.93
IL-10	2111	2761.78	2832.04	731.308	843.178	930.891	964.513	2852.78	978.761	2508.85	1859.94	1314.75	2661.54	2713.73	2263.8	2482.2	1970.4	1126.78
IL-12p70	5496.08	6963.34	6940.93	4286.58	5331.59	5414.45	4666.86	5691.72	4350.03	4508.84	5270.99	3964.88	5784.84	6597.16	7628.75	6679.35	6433.44	6266.95
