# Supplementary material for: Type 1 piliated uropathogenic Escherichia coli hijack the host immune response by binding to CD14
Source: eLife. 2022 Jul 26;11:e78995. doi: 10.7554/eLife.78995 (PMC9359703; doi:10.7554/eLife.78995)
Supplement: Figure 5—figure supplement 1—source data 1. [file elife-78995-fig5-figsupp1-data1.xlsx]

## Sheet: panel B
Figure 5-figure supplement 1, panel B: Adhesion of WT DCs - fluorescent values
E. coli W ON	E. coli W ON fimH CFT073
1413	1099
1010	1125
1410	857
907	868
1171	1155
