# Supplementary material for: Type 1 piliated uropathogenic Escherichia coli hijack the host immune response by binding to CD14
Source: eLife. 2022 Jul 26;11:e78995. doi: 10.7554/eLife.78995 (PMC9359703; doi:10.7554/eLife.78995)
Supplement: Figure 5—figure supplement 1—source data 2. [file elife-78995-fig5-figsupp1-data2.xlsx]

## Sheet: panel C
Figure 5-figure supplement 1, panel C: expression of co-stimulators on WT DCs
DC	co-stimulator	stimulus	Sample:	DCs/Single Cells | Median
WT	CD40	E coli W ON fimH CFT073	WT pathogenic fimH_MG002 1_001.fcs	485
WT	CD40	E coli W ON fimH CFT073	WT pathogenic fimH_MG002 2_001.fcs	491
WT	CD40	E coli W ON fimH CFT073	WT pathogenic fimH_MG002 3_001.fcs	496
WT	CD40	E coli W ON	WT pathogenic fimH_232 1_001.fcs	501
WT	CD40	E coli W ON	WT pathogenic fimH_232 2_001.fcs	509
WT	CD40	E coli W ON	WT pathogenic fimH_232 3_001.fcs	504
WT	CD80	E coli W ON fimH CFT073	WT pathogenic fimH_MG002 1_001.fcs	822
WT	CD80	E coli W ON fimH CFT073	WT pathogenic fimH_MG002 2_001.fcs	839
WT	CD80	E coli W ON fimH CFT073	WT pathogenic fimH_MG002 3_001.fcs	845
WT	CD80	E coli W ON	WT pathogenic fimH_232 1_001.fcs	903
WT	CD80	E coli W ON	WT pathogenic fimH_232 2_001.fcs	890
WT	CD80	E coli W ON	WT pathogenic fimH_232 3_001.fcs	886
WT	CD86	E coli W ON fimH CFT073	WT pathogenic fimH_MG002 1_001.fcs	7742
WT	CD86	E coli W ON fimH CFT073	WT pathogenic fimH_MG002 2_001.fcs	7934
WT	CD86	E coli W ON fimH CFT073	WT pathogenic fimH_MG002 3_001.fcs	8111
WT	CD86	E coli W ON	WT pathogenic fimH_232 1_001.fcs	8709
WT	CD86	E coli W ON	WT pathogenic fimH_232 2_001.fcs	7536
WT	CD86	E coli W ON	WT pathogenic fimH_232 3_001.fcs	7141
