# Supplementary material for: Type 1 piliated uropathogenic Escherichia coli hijack the host immune response by binding to CD14
Source: eLife. 2022 Jul 26;11:e78995. doi: 10.7554/eLife.78995 (PMC9359703; doi:10.7554/eLife.78995)
Supplement: Figure 5—figure supplement 1—source data 3. [file elife-78995-fig5-figsupp1-data3.xlsx]

## Sheet: panel D
Figure 5-figure supplement 1, panel D: Adhesion of WT DCs - fluorescent values
UTI89 ON	UTI89 OFF	536 ON	536 OFF
1782	672	989	973
1515	833	1293	954
2144	1051	1309	658
