# Supplementary material for: Type 1 piliated uropathogenic Escherichia coli hijack the host immune response by binding to CD14
Source: eLife. 2022 Jul 26;11:e78995. doi: 10.7554/eLife.78995 (PMC9359703; doi:10.7554/eLife.78995)
Supplement: Figure 5—figure supplement 1—source data 4. [file elife-78995-fig5-figsupp1-data4.xlsx]

## Sheet: panel E
Figure 5-figure supplement 1, panel E: expression of co-stimulators on WT DCs
DC	co-stimulator	stimulus	Sample:	DCs/Single Cells | Median
WT	CD40	UTI89 ON	WT with UTI89_177 1.fcs	433
WT	CD40	UTI89 ON	WT with UTI89_177 2.fcs	484
WT	CD40	UTI89 ON	WT with UTI89_177 3.fcs	439
WT	CD40	UTI89 OFF	WT with UTI89_178 1.fcs	420
WT	CD40	UTI89 OFF	WT with UTI89_178 2.fcs	421
WT	CD40	UTI89 OFF	WT with UTI89_178 3.fcs	420
WT	CD80	UTI89 ON	WT with UTI89_177 1.fcs	542
WT	CD80	UTI89 ON	WT with UTI89_177 2.fcs	555
WT	CD80	UTI89 ON	WT with UTI89_177 3.fcs	538
WT	CD80	UTI89 OFF	WT with UTI89_178 1.fcs	503
WT	CD80	UTI89 OFF	WT with UTI89_178 2.fcs	524
WT	CD80	UTI89 OFF	WT with UTI89_178 3.fcs	503
WT	CD86	UTI89 ON	WT with UTI89_177 1.fcs	2502
WT	CD86	UTI89 ON	WT with UTI89_177 2.fcs	2334
WT	CD86	UTI89 ON	WT with UTI89_177 3.fcs	2290
WT	CD86	UTI89 OFF	WT with UTI89_178 1.fcs	3460
WT	CD86	UTI89 OFF	WT with UTI89_178 2.fcs	3604
WT	CD86	UTI89 OFF	WT with UTI89_178 3.fcs	3971
