# Supplementary material for: Type 1 piliated uropathogenic Escherichia coli hijack the host immune response by binding to CD14
Source: eLife. 2022 Jul 26;11:e78995. doi: 10.7554/eLife.78995 (PMC9359703; doi:10.7554/eLife.78995)
Supplement: Figure 5—figure supplement 1—source data 5. [file elife-78995-fig5-figsupp1-data5.xlsx]

## Sheet: panel F
Figure 5-figure supplement 1, panel F: expression of co-stimulators on WT DCs
DC	co-stimulator	stimulus	Sample:	DCs/Single Cells | Median
WT	CD40	536 ON	WT with 536 and sat_280 1.fcs	474
WT	CD40	536 ON	WT with 536 and sat_280 2.fcs	485
WT	CD40	536 ON	WT with 536 and sat_280 3.fcs	469
WT	CD40	536 OFF	WT with 536 and sat_281 1.fcs	441
WT	CD40	536 OFF	WT with 536 and sat_281 2.fcs	467
WT	CD40	536 OFF	WT with 536 and sat_281 3.fcs	451
WT	CD80	536 ON	WT with 536 and sat_280 1.fcs	354
WT	CD80	536 ON	WT with 536 and sat_280 2.fcs	369
WT	CD80	536 ON	WT with 536 and sat_280 3.fcs	352
WT	CD80	536 OFF	WT with 536 and sat_281 1.fcs	340
WT	CD80	536 OFF	WT with 536 and sat_281 2.fcs	412
WT	CD80	536 OFF	WT with 536 and sat_281 3.fcs	380
WT	CD86	536 ON	WT with 536 and sat_280 1.fcs	1518
WT	CD86	536 ON	WT with 536 and sat_280 2.fcs	1648
WT	CD86	536 ON	WT with 536 and sat_280 3.fcs	1824
WT	CD86	536 OFF	WT with 536 and sat_281 1.fcs	3265
WT	CD86	536 OFF	WT with 536 and sat_281 2.fcs	2923
WT	CD86	536 OFF	WT with 536 and sat_281 3.fcs	3060
