# Supplementary material for: Type 1 piliated uropathogenic Escherichia coli hijack the host immune response by binding to CD14
Source: eLife. 2022 Jul 26;11:e78995. doi: 10.7554/eLife.78995 (PMC9359703; doi:10.7554/eLife.78995)
Supplement: Figure 5—source data 1. [file elife-78995-fig5-data1.xlsx]

## Sheet: panel B
Figure 5, panel B: bead-binding assay - fluorescent events inside bacteria gate
stimulus	file name	fluorescent counts in bacteria gate
ON	271120_VG003 1.fcs	9450
ON	271120_VG003 2.fcs	9362
ON	271120_VG003 3.fcs	9348
Y48A R98A T99A	280121_268 1.fcs	6621
Y48A R98A T99A	280121_268 2.fcs	7996
Y48A R98A T99A	280121_268 3.fcs	8255
Y48A	280121_269 1.fcs	9225
Y48A	280121_269 2.fcs	9061
Y48A	280121_269 3.fcs	9271
R98A	280121_270 1.fcs	8615
R98A	280121_270 2.fcs	8557
R98A	280121_270 3.fcs	8062
T99A	280121_271 1.fcs	8093
T99A	280121_271 2.fcs	8009
T99A	280121_271 3.fcs	7593
ON dfimH	271120_KT 257 3.fcs	1491
ON dfimH	271120_KT257 1.fcs	1263
ON dfimH	271120_KT257 2.fcs	2810
