# Supplementary material for: Type 1 piliated uropathogenic Escherichia coli hijack the host immune response by binding to CD14
Source: eLife. 2022 Jul 26;11:e78995. doi: 10.7554/eLife.78995 (PMC9359703; doi:10.7554/eLife.78995)
Supplement: Figure 5—source data 2. [file elife-78995-fig5-data2.xlsx]

## Sheet: panel C
Figure 5, panel C: co-stimulators on WT DCs
DC	co-stimulator	stimulus	Sample:	DCs/Single Cells | Median
WT	CD40	CFT073 ON	179_179 1.fcs	183
WT	CD40	CFT073 ON	179_179 2.fcs	192
WT	CD40	CFT073 ON	179_179 3.fcs	202
WT	CD40	CFT073 ON fimH Y48A R98A T99A	fimH mutants_260 2.fcs	577
WT	CD40	CFT073 ON fimH Y48A R98A T99A	fimH mutants_260 3.fcs	580
WT	CD40	CFT073 ON fimH Y48A	fimH mutants_261 1.fcs	407
WT	CD40	CFT073 ON fimH Y48A	fimH mutants_261 2.fcs	413
WT	CD40	CFT073 ON fimH Y48A	fimH mutants_261 3.fcs	378
WT	CD40	CFT073 ON fimH R98A	fimH mutants_262 1.fcs	383
WT	CD40	CFT073 ON fimH R98A	fimH mutants_262 2.fcs	392
WT	CD40	CFT073 ON fimH R98A	fimH mutants_262 3.fcs	374
WT	CD40	CFT073 ON fimH T99A	151220_263 1.fcs	275
WT	CD40	CFT073 ON fimH T99A	151220_263 2.fcs	272
WT	CD40	CFT073 ON fimH T99A	151220_263 3.fcs	274
WT	CD40	CFT073 ON dfimH	WT fim mutants_193 1.fcs	500
WT	CD40	CFT073 ON dfimH	WT fim mutants_193 2.fcs	511
WT	CD40	CFT073 ON dfimH	WT fim mutants_193 3.fcs	514
WT	CD80	CFT073 ON	179_179 1.fcs	262
WT	CD80	CFT073 ON	179_179 2.fcs	352
WT	CD80	CFT073 ON	179_179 3.fcs	202
WT	CD80	CFT073 ON fimH Y48A R98A T99A	fimH mutants_260 1.fcs	494
WT	CD80	CFT073 ON fimH Y48A R98A T99A	fimH mutants_260 2.fcs	494
WT	CD80	CFT073 ON fimH Y48A R98A T99A	fimH mutants_260 3.fcs	510
WT	CD80	CFT073 ON fimH Y48A	fimH mutants_261 1.fcs	469
WT	CD80	CFT073 ON fimH Y48A	fimH mutants_261 2.fcs	525
WT	CD80	CFT073 ON fimH Y48A	fimH mutants_261 3.fcs	503
WT	CD80	CFT073 ON fimH R98A	fimH mutants_262 1.fcs	409
WT	CD80	CFT073 ON fimH R98A	fimH mutants_262 2.fcs	418
WT	CD80	CFT073 ON fimH R98A	fimH mutants_262 3.fcs	391
WT	CD80	CFT073 ON fimH T99A	151220_263 1.fcs	560
WT	CD80	CFT073 ON fimH T99A	151220_263 2.fcs	536
WT	CD80	CFT073 ON fimH T99A	151220_263 3.fcs	560
WT	CD80	CFT073 ON dfimH	WT fim mutants_193 1.fcs	648
WT	CD80	CFT073 ON dfimH	WT fim mutants_193 2.fcs	685
WT	CD80	CFT073 ON dfimH	WT fim mutants_193 3.fcs	679
WT	CD86	CFT073 ON	179_179 1.fcs	1602
WT	CD86	CFT073 ON	179_179 2.fcs	1625
WT	CD86	CFT073 ON	179_179 3.fcs	1148
WT	CD86	CFT073 ON fimH Y48A R98A T99A	fimH mutants_260 1.fcs	2881
WT	CD86	CFT073 ON fimH Y48A R98A T99A	fimH mutants_260 2.fcs	2714
WT	CD86	CFT073 ON fimH Y48A R98A T99A	fimH mutants_260 3.fcs	2826
WT	CD86	CFT073 ON fimH Y48A	fimH mutants_261 1.fcs	2861
WT	CD86	CFT073 ON fimH Y48A	fimH mutants_261 2.fcs	2605
WT	CD86	CFT073 ON fimH Y48A	fimH mutants_261 3.fcs	2994
WT	CD86	CFT073 ON fimH R98A	fimH mutants_262 1.fcs	2408
WT	CD86	CFT073 ON fimH R98A	fimH mutants_262 2.fcs	3435
WT	CD86	CFT073 ON fimH R98A	fimH mutants_262 3.fcs	3570
WT	CD86	CFT073 ON fimH T99A	151220_263 1.fcs	2688
WT	CD86	CFT073 ON fimH T99A	151220_263 2.fcs	2944
WT	CD86	CFT073 ON fimH T99A	151220_263 3.fcs	2720
WT	CD86	CFT073 ON dfimH	WT fim mutants_193 1.fcs	5916
WT	CD86	CFT073 ON dfimH	WT fim mutants_193 2.fcs	6334
WT	CD86	CFT073 ON dfimH	WT fim mutants_193 3.fcs	5930
