# Supplementary material for: Type 1 piliated uropathogenic Escherichia coli hijack the host immune response by binding to CD14
Source: eLife. 2022 Jul 26;11:e78995. doi: 10.7554/eLife.78995 (PMC9359703; doi:10.7554/eLife.78995)
Supplement: Figure 6—source data 1. [file elife-78995-fig6-data1.xlsx]

## Sheet: panel A
Figure 6, panel A: bead-binding assay - fluorescent events inside bacteria gate
stimulus	file name	fluorescent counts in bacteria gate
ON	271120_VG003 1.fcs	9450
ON	271120_VG003 2.fcs	9362
ON	271120_VG003 3.fcs	9348
20µg/ml M14-23	080121_M14-23 1.fcs	6795
20µg/ml M14-23	080121_M14-23 2.fcs	6203
20µg/ml M14-23	080121_M14-23 3.fcs	5709
1mM D-mannose	080121_1mM mannose 1.fcs	1509
1mM D-mannose	080121_1mM mannose 2.fcs	1752
1mM D-mannose	080121_1mM mannose 3.fcs	1571
10µM M4284	080121_10uM 4284 1.fcs	1784
10µM M4284	080121_10uM 4284 2.fcs	1480
10µM M4284	080121_10uM 4284 3.fcs	1702
175µM D-mannose	260221_175uM mannose 1.fcs	7529
175µM D-mannose	260221_175uM mannose 2.fcs	7832
175µM D-mannose	260221_175uM mannose 3.fcs	7805
ON dfimH	271120_KT 257 3.fcs	1491
ON dfimH	271120_KT257 1.fcs	1263
ON dfimH	271120_KT257 2.fcs	2810
