# Supplementary material for: Type 1 piliated uropathogenic Escherichia coli hijack the host immune response by binding to CD14
Source: eLife. 2022 Jul 26;11:e78995. doi: 10.7554/eLife.78995 (PMC9359703; doi:10.7554/eLife.78995)
Supplement: Figure 6—source data 2. [file elife-78995-fig6-data2.xlsx]

## Sheet: panel B
Figure 6, panel B: co-stimulators on WT DCs
DC	co-stimulator	stimulus	Sample:	DCs/Single Cells | Median
WT	CD40	CFT073 ON	179_179 1.fcs	183
WT	CD40	CFT073 ON	179_179 2.fcs	192
WT	CD40	CFT073 ON	179_179 3.fcs	202
WT	CD40	CFT073 ON + 1mM D-mannose	151220_1mM dmannose 1.fcs	243
WT	CD40	CFT073 ON + 1mM D-mannose	151220_1mM dmannose 2.fcs	260
WT	CD40	CFT073 ON + 1mM D-mannose	151220_1mM dmannose 3.fcs	250
WT	CD40	CFT073 ON + M4284	WT mannose_M4284 1.fcs	398
WT	CD40	CFT073 ON + M4284	WT mannose_M4284 2.fcs	395
WT	CD40	CFT073 ON + M4284	WT mannose_M4284 3.fcs	408
WT	CD40	CFT073 ON + 175uM D-mannose	260221_175uM dmannose 1.fcs	571
WT	CD40	CFT073 ON + 175uM D-mannose	260221_175uM dmannose 2.fcs	429
WT	CD40	CFT073 ON + 175uM D-mannose	260221_175uM dmannose 3.fcs	414
WT	CD40	CFT073 ON + M14-23	WT bCD14_179 1.fcs	474
WT	CD40	CFT073 ON + M14-23	WT bCD14_179 2.fcs	466
WT	CD40	CFT073 ON + M14-23	WT bCD14_179 3.fcs	519
WT	CD40	CFT073 ON dfimH	WT fim mutants_193 1.fcs	500
WT	CD40	CFT073 ON dfimH	WT fim mutants_193 2.fcs	511
WT	CD40	CFT073 ON dfimH	WT fim mutants_193 3.fcs	514
WT	CD80	CFT073 ON	179_179 1.fcs	262
WT	CD80	CFT073 ON	179_179 2.fcs	352
WT	CD80	CFT073 ON	179_179 3.fcs	202
WT	CD80	CFT073 ON + 1mM D-mannose	151220_1mM dmannose 1.fcs	550
WT	CD80	CFT073 ON + 1mM D-mannose	151220_1mM dmannose 2.fcs	546
WT	CD80	CFT073 ON + 1mM D-mannose	151220_1mM dmannose 3.fcs	525
WT	CD80	CFT073 ON + M4284	WT mannose_M4284 1.fcs	394
WT	CD80	CFT073 ON + M4284	WT mannose_M4284 2.fcs	385
WT	CD80	CFT073 ON + M4284	WT mannose_M4284 3.fcs	388
WT	CD80	CFT073 ON + 175uM D-mannose	260221_175uM dmannose 1.fcs	409
WT	CD80	CFT073 ON + 175uM D-mannose	260221_175uM dmannose 2.fcs	321
WT	CD80	CFT073 ON + 175uM D-mannose	260221_175uM dmannose 3.fcs	394
WT	CD80	CFT073 ON + M14-23	WT bCD14_179 1.fcs	958
WT	CD80	CFT073 ON + M14-23	WT bCD14_179 2.fcs	1117
WT	CD80	CFT073 ON + M14-23	WT bCD14_179 3.fcs	1097
WT	CD80	CFT073 ON dfimH	WT fim mutants_193 1.fcs	648
WT	CD80	CFT073 ON dfimH	WT fim mutants_193 2.fcs	685
WT	CD80	CFT073 ON dfimH	WT fim mutants_193 3.fcs	679
WT	CD86	CFT073 ON	179_179 1.fcs	1602
WT	CD86	CFT073 ON	179_179 2.fcs	1625
WT	CD86	CFT073 ON	179_179 3.fcs	1148
WT	CD86	CFT073 ON + 1mM D-mannose	151220_1mM dmannose 1.fcs	2746
WT	CD86	CFT073 ON + 1mM D-mannose	151220_1mM dmannose 2.fcs	2668
WT	CD86	CFT073 ON + 1mM D-mannose	151220_1mM dmannose 3.fcs	2820
WT	CD86	CFT073 ON + M4284	WT mannose_M4284 1.fcs	2688
WT	CD86	CFT073 ON + M4284	WT mannose_M4284 2.fcs	2574
WT	CD86	CFT073 ON + M4284	WT mannose_M4284 3.fcs	2599
WT	CD86	CFT073 ON + 175uM D-mannose	260221_175uM dmannose 1.fcs	1890
WT	CD86	CFT073 ON + 175uM D-mannose	260221_175uM dmannose 2.fcs	1867
WT	CD86	CFT073 ON + 175uM D-mannose	260221_175uM dmannose 3.fcs	2312
WT	CD86	CFT073 ON + M14-23	WT bCD14_179 1.fcs	4537
WT	CD86	CFT073 ON + M14-23	WT bCD14_179 2.fcs	6783
WT	CD86	CFT073 ON + M14-23	WT bCD14_179 3.fcs	5314
WT	CD86	CFT073 ON dfimH	WT fim mutants_193 1.fcs	5916
WT	CD86	CFT073 ON dfimH	WT fim mutants_193 2.fcs	6334
WT	CD86	CFT073 ON dfimH	WT fim mutants_193 3.fcs	5930
