# Supplementary material for: Type 1 piliated uropathogenic Escherichia coli hijack the host immune response by binding to CD14
Source: eLife. 2022 Jul 26;11:e78995. doi: 10.7554/eLife.78995 (PMC9359703; doi:10.7554/eLife.78995)
Supplement: Figure 6—source data 3. [file elife-78995-fig6-data3.xlsx]

## Sheet: panel C
Figure 6, panel C: in vitro T cells in proliferation after contact with WT DCs
									number of devided cells per peak
Sample:	0	1	2	3	4	5			0	1	2	3	4	5			# cells at start	total number of division	# cells in division	stimulus
WT bCD14 ON OVA 1_E2_E02.fcs	1440	8581	17446	24055	14961	3957			1440	4290.5	4361.5	3006.88	935.062	123.656			14157.6	0	12717.6	ON1 + M14-23
WT bCD14 ON OVA 1_E3_E03.fcs	1885	8204	23331	36926	43974	29234			1885	4102	5832.75	4615.75	2748.38	913.562			20097.4	0	18212.4	ON1 + M14-23
WT bCD14 ON OVA 2_E4_E04.fcs	2366	10590	26298	38135	42116	28977			2366	5295	6574.5	4766.88	2632.25	905.531			22540.2	0	20174.2	ON2 + M14-23
WT bCD14 ON OVA 2_E5_E05.fcs	1991	10059	25510	39737	41745	27756			1991	5029.5	6377.5	4967.12	2609.06	867.375			21841.6	0	19850.6	ON2 + M14-23
WT bCD14 ON OVA 3_E6_E06.fcs	1974	9902	25538	39429	42150	25247			1974	4951	6384.5	4928.62	2634.38	788.969			21661.5	0	19687.5	ON3 + M14-23
WT bCD14 ON OVA 3_E7_E07.fcs	1786	8298	23236	37276	36231	28060			1786	4149	5809	4659.5	2264.44	876.875			19544.8	0	17758.8	ON3 + M14-23
01-ON-A10.fcs	1031	2683	4154	4322	4434	5213			1031	1341.5	1038.5	540.25	277.125	162.906			4391.28	0	3360.28	ON1
01-ON-A11.fcs	1228	3104	5823	6941	7758	8918			1228	1552	1455.75	867.625	484.875	278.688			5866.94	0	4638.94	ON1
01-ON-B10.fcs	1138	2746	4334	4816	4672	4689			1138	1373	1083.5	602	292	146.531			4635.03	0	3497.03	ON2
01-ON-B11.fcs	1130	2992	4670	5721	5818	6420			1130	1496	1167.5	715.125	363.625	200.625			5072.88	0	3942.88	ON2
01-ON-C10.fcs	1331	3107	4793	4950	4479	4354			1331	1553.5	1198.25	618.75	279.938	136.062			5117.5	0	3786.5	ON3
01-ON-C11.fcs	1566	3503	5758	6516	6140	6603			1566	1751.5	1439.5	814.5	383.75	206.344			6161.59	0	4595.59	ON3
