# Supplementary material for: Type 1 piliated uropathogenic Escherichia coli hijack the host immune response by binding to CD14
Source: eLife. 2022 Jul 26;11:e78995. doi: 10.7554/eLife.78995 (PMC9359703; doi:10.7554/eLife.78995)
Supplement: Figure 7—source data 1. [file elife-78995-fig7-data1.xlsx]

## Sheet: panel A
Figure 7, panel A: in vivo T cells in proliferation after contact with WT DCs
											% of cells in each division peak									cell per division peak, normalized for rounds of division
Sample:	0	1	2	3	4	5	6	7		# of cells	0	1	2	3	4	5	6	7		0	1	2	3	4	5	6	7	# cells at start	total number of division	# cells in division	division index	proliferation index	expansion index	replicaiton index
Specimen_001_OFF 1L.fcs	2572	880	1388	1891	2065	2062	1012	1553		13423	19.1611	6.55591	10.3405	14.0878	15.384	15.3617	7.5393	11.5697		2572	440	347	236.375	129.062	64.4375	15.8125	12.1328	3816.82	2861.37	1244.82	0.749673	2.29862	3.5168	2.29862
Specimen_001_OFF 2L.fcs	1971	776	1337	2101	2965	3975	4094	3326		20545	9.59358	3.77707	6.50767	10.2263	14.4317	19.3478	19.927	16.1889		1971	388	334.25	262.625	185.312	124.219	63.9688	25.9844	3355.36	3772.42	1384.36	1.1243	2.72503	6.12304	2.72503
Specimen_001_OFF 2R.fcs	2782	1075	1920	3183	4269	6669	8021	5490		33409	8.3271	3.2177	5.74695	9.52737	12.778	19.9617	24.0085	16.4327		2782	537.5	480	397.875	266.812	208.406	125.328	42.8906	4840.81	5852.61	2058.81	1.20901	2.84271	6.90153	2.84271
Specimen_001_OFF 3L.fcs	2260	789	1444	2184	2737	2932	2125	2908		17379	13.0042	4.53996	8.30888	12.5669	15.7489	16.8709	12.2274	16.7328		2260	394.5	361	273	171.062	91.625	33.2031	22.7188	3607.11	3436.12	1347.11	0.952598	2.55074	4.81799	2.55074
Specimen_001_OFF 3R.fcs	2884	1235	2065	3489	4841	6054	5530	4741		30839	9.35179	4.00467	6.69607	11.3136	15.6977	19.631	17.9318	15.3734		2884	617.5	516.25	436.125	302.562	189.188	86.4062	37.0391	5069.07	5892.27	2185.07	1.1624	2.69661	6.08376	2.69661
Specimen_001_ON 1L.fcs	1316	425	551	787	949	995	789	1112		6924	19.0064	6.13807	7.95783	11.3663	13.706	14.3703	11.3951	16.0601		1316	212.5	137.75	98.375	59.3125	31.0938	12.3281	8.6875	1876.05	1310.62	560.047	0.69861	2.34021	3.69074	2.34021
Specimen_001_ON 2L.fcs	3625	1258	1709	2416	2881	3378	2238	3049		20554	17.6365	6.12046	8.31468	11.7544	14.0167	16.4348	10.8884	14.8341		3625	629	427.25	302	180.062	105.562	34.9688	23.8203	5327.66	4014.12	1702.66	0.753448	2.35755	3.85798	2.35755
Specimen_001_ON 2R.fcs	3408	1451	2566	3641	3828	4735	5113	2753		27495	12.395	5.27732	9.33261	13.2424	13.9225	17.2213	18.5961	10.0127		3408	725.5	641.5	455.125	239.25	147.969	79.8906	21.5078	5718.74	5700.62	2310.74	0.996831	2.46701	4.80788	2.46701
Specimen_001_ON 3L.fcs	3359	1283	1995	2769	3407	3609	3074	4661		24157	13.9049	5.31109	8.25848	11.4625	14.1036	14.9398	12.7251	19.2946		3359	641.5	498.75	346.125	212.938	112.781	48.0312	36.4141	5255.54	4636.12	1896.54	0.882139	2.44451	4.59648	2.44451
Specimen_001_ON 3R.fcs	2891	1283	2062	2829	3181	3096	3155	2740		21237	13.613	6.04134	9.70947	13.3211	14.9786	14.5783	14.8561	12.902		2891	641.5	515.5	353.625	198.812	96.75	49.2969	21.4062	4767.89	4458	1876.89	0.935005	2.37521	4.45417	2.37521
