# Supplementary material for: Type 1 piliated uropathogenic Escherichia coli hijack the host immune response by binding to CD14
Source: eLife. 2022 Jul 26;11:e78995. doi: 10.7554/eLife.78995 (PMC9359703; doi:10.7554/eLife.78995)
Supplement: Figure 7—source data 2. [file elife-78995-fig7-data2.xlsx]

## Sheet: panel B
Figure 7, panel B: individual ear crawl in assay - WT mice
file number	stimulus	stain	Mean	in/out
188	ON	green	3.19	0.43366
			7.356
190	ON	green	6.174	0.947514
			6.516
196	ON	red	0.996	0.48538
			2.052
203	ON	red	0.926	0.771024
			1.201
164	ON	green (in red/green mix)	0.505	0.442207
			1.142
164	ON	red (in red/green mix)	0.475	0.403226
			1.178
167	OFF	green	0.902	2.21078
			0.408
168	OFF	green	2.56	1.90193
			1.346
180	OFF	red	1.473	1.01656
			1.449
183	OFF	red	5.468	1.3402
			4.08
156	OFF	red (in red/green mix)	1.414	1.18525
			1.193
160	OFF	red (in red/green mix)	1.751	1.99658
			0.877
