# Supplementary material for: Type 1 piliated uropathogenic Escherichia coli hijack the host immune response by binding to CD14
Source: eLife. 2022 Jul 26;11:e78995. doi: 10.7554/eLife.78995 (PMC9359703; doi:10.7554/eLife.78995)
Supplement: Figure 7—source data 3. [file elife-78995-fig7-data3.xlsx]

## Sheet: panel C
Figure 7, panel C: in vivo individual DC migration - cells inside the lymphnode
ON	OFF
421	618
201	84
308	384
168	818
98	442
72	773
