# Supplementary material for: Type 1 piliated uropathogenic Escherichia coli hijack the host immune response by binding to CD14
Source: eLife. 2022 Jul 26;11:e78995. doi: 10.7554/eLife.78995 (PMC9359703; doi:10.7554/eLife.78995)
Supplement: Figure 7—source data 4. [file elife-78995-fig7-data4.xlsx]

## Sheet: panel D
Figure 7, panel D: in vivo individual DC migration - cells inside the lymphnode
ON	ON + M14-23
493	1647
218	2439
521	899
234	1555
160	192
119	247
66	279
