# Supplementary material for: Type 1 piliated uropathogenic Escherichia coli hijack the host immune response by binding to CD14
Source: eLife. 2022 Jul 26;11:e78995. doi: 10.7554/eLife.78995 (PMC9359703; doi:10.7554/eLife.78995)
Supplement: Figure 7—source data 5. [file elife-78995-fig7-data5.xlsx]

## Sheet: panel E
Figure 7, panel E: mixed ear crawl in assay - WT mice
file number	stain	mean	ratio
206	ON green	2.357	2.93159
		0.804
	OFF red	1.392	1.65125
		0.843
207	ON green	1.785	1.25351
		1.424
	OFF red	0.681	0.604796
		1.126
209	ON green	1.942	0.714233
		2.719
	OFF red	2.566	1.04735
		2.45
210	ON green	2.848	0.513153
		5.55
	OFF red	2.711	0.713609
		3.799
211	ON green	1.831	0.357478
		5.122
	OFF red	2.439	0.553438
		4.407
213	ON green	1.513	1.641
		0.922
	OFF red	1.109	1.70092
		0.652
222	ON red	2.511	1.04712
		2.398
	OFF green	5.692	1.19605
		4.759
224	ON red	1.501	1.12015
		1.34
	OFF green	1.81	0.864374
		2.094
215	ON red	1.796	0.744919
		2.411
	OFF green	2.187	0.636681
		3.435
218	ON red	6.535	1.00616
		6.495
	OFF green	5.714	0.958564
		5.961
220	ON red	7.115	1.42814
		4.982
	OFF green	6.95	1.39334
		4.988
