# Supplementary material for: Type 1 piliated uropathogenic Escherichia coli hijack the host immune response by binding to CD14
Source: eLife. 2022 Jul 26;11:e78995. doi: 10.7554/eLife.78995 (PMC9359703; doi:10.7554/eLife.78995)
Supplement: Figure 7—source data 6. [file elife-78995-fig7-data6.xlsx]

## Sheet: panel F
Figure 7, panel F: mixed in vivo migration assay - cells inside the lymphnode normalized to preinjection mix
pre-injection
ON green	OFF red	OFF/ON ratio
10597	11624	1.09691
ON red	OFF green
8947	12294	1.37409
post-injection
Sample:	mature DCs/DCs/Single Cells/oregon green | Count	mature DCs/DCs/Single Cells/TAMRA | Count		ON green	OFF red	ON red	OFF green
Specimen_001_1L.fcs	1025	833		1124.34	833
Specimen_001_1R.fcs	1244	1231				1691.51	1244
Specimen_001_2L.fcs	2032	1628		2228.93	1628
Specimen_001_3L.fcs	1142	904		1252.68	904
Specimen_001_3R.fcs	507	612				840.944	507
Specimen_001_4L.fcs	545	399		597.818	399
Specimen_001_4R.fcs	377	397				545.514	377
Specimen_001_5R.fcs	862	958				1316.38	862
