# Supplementary material for: Type 1 piliated uropathogenic Escherichia coli hijack the host immune response by binding to CD14
Source: eLife. 2022 Jul 26;11:e78995. doi: 10.7554/eLife.78995 (PMC9359703; doi:10.7554/eLife.78995)
Supplement: Supplementary file 3. [file elife-78995-supp3.xlsx]

## Sheet: binding energy
Table S2. Predicted free binding energies of mouse CD14, TLR4 and CD48 to FimH.
CD14-FimH -56.98 kcal/mol				TLR4-FimH -49.81 kcal/mol				CD48-FimH -35.55 kcal/mol
CD14 1WWL monomer		FimH 6GTV		TLR4 3VQ2		FimH 6GTV		CD48 2PTV		FimH 6GTV
residue	energy (kcal/mol)	residue	energy (kcal/mol)	residue	energy (kcal/mol)	residue	energy (kcal/mol)	residue	energy (kcal/mol)	residue	energy (kcal/mol)
R-A-ASN-255	-3.96	L-B-ARG-98	-7.23	R-A-ASN-211	-8.3	L-B-ARG-132	-8.22	R-A-ASN-19	-3.39	L-B-GLU-57	-5.77
R-A-VAL-274	-3.37	L-B-THR-99	-4.92	R-A-GLU-243	-4.96	L-B-ASN-136	-4.09	R-A-VAL-248	-3.1	L-B-ASN-67	-5.44
R-A-THR-97	-3.31	L-B-TYR-48	-4.29	R-A-ASN-209	-3.61	L-B-SER-139	-2.89	R-A-TYR-21	-2.5	L-B-ASN-13	-2.25
R-A-SER-253	-2.81	L-B-ILE-13	-3.51	R-A-TYR-159	-2.66	L-B-TYR-55	-2.68	R-A-LYS-121	-2.27	L-B-TYR-9	-2.18
R-A-ASP-175	-2.63	L-B-PRO-12	-3.41	R-A-ILE-215	-2.65	L-B-PRO-91	-2.38	R-A-LEU-240	-2.22	L-B-SER-12	-2.06
R-A-SER-257	-2.52	L-B-PHE-142	-3.21	R-A-SER-212	-2.02	L-B-THR-134	-2.22	R-A-TYR-149	-2.04	L-B-ASN-40	-1.86
R-A-VAL-201	-2.38	L-B-SER-139	-1.74	R-A-PRO-187	-1.74	L-B-GLU-89	-2.2	R-A-ASN-228	-1.94	L-B-TYR-39	-1.7
R-A-ILE-121	-1.84	L-B-GLN-143	-1.61	R-A-TYR-157	-1.52	L-B-ARG-92	-1.86	R-A-ALA-242	-1.05	L-B-ASN-59	-1.53
R-A-SER-278	-1.66	L-B-SER-17	-1.34	R-A-ASP-189	-1.3	L-B-ASN-138	-1.27	R-A-SER-124	-0.93	L-B-GLY-11	-1.11
R-A-GLN-94	-1.59	L-B-SER-97	-1.31	R-A-ILE-244	-0.66	L-B-THR-53	-1.22	R-A-GLY-123	-0.91	L-B-VAL-68	-0.5
R-A-GLY-228	-1.52	L-B-GLU-50	-1.1	R-A-ILE-188	-0.48	L-B-VAL-94	-1.12	R-A-ASN-151	-0.87	L-B-ARG-69	-0.36
R-A-VAL-149	-1.44	L-B-GLY-15	-1.02	R-A-GLY-208	-0.47	L-B-TYR-137	-0.85	R-A-GLY-241	-0.87	L-B-PRO-22	-0.24
R-A-ASN-296	-1.41	L-B-TYR-137	-0.93	R-A-LEU-185	-0.31	L-B-ARG-98	-0.66	R-A-ALA-247	-0.59	L-B-ASN-60	-0.18
R-A-ARG-68	-1.32	L-B-ASN-96	-0.88	R-A-ASN-241	-0.25	L-B-LYS-76	-0.57	R-A-ALA-150	-0.57	L-B-ASP-72	-0.17
R-A-PHE-258	-1.09	L-B-ALA-10	-0.72	R-A-PHE-134	-0.16	L-B-LYS-4	-0.56	R-A-GLY-251	-0.54	L-B-PHE-95	-0.16
R-A-GLN-200	-0.66	L-B-GLY-14	-0.64	R-A-PHE-190	-0.16	L-B-LYS-101	-0.53	R-A-LEU-250	-0.41	L-B-TYR-37	-0.14
R-A-TYR-279	-0.66	L-B-PRO-49	-0.61	R-A-SER-213	-0.15	L-B-LYS-189	-0.5	R-A-LEU-125	-0.37	L-B-ALA-62	-0.08
R-A-SER-232	-0.64	L-B-PHE-144	-0.54	R-A-ASP-238	-0.11	L-B-THR-57	-0.45	R-A-VAL-243	-0.25	L-B-VAL-14	-0.07
R-A-THR-173	-0.63	L-B-LYS-76	-0.46	R-A-LYS-237	-0.1	L-B-PHE-1	-0.43	R-A-SER-249	-0.18	L-B-PHE-50	-0.07
R-A-LEU-229	-0.53	L-B-HIE-45	-0.44	R-A-MET-216	-0.09	L-B-ARG-166	-0.42	R-A-ALA-122	-0.17	L-B-ILE-26	-0.06
R-A-ALA-203	-0.49	L-B-ASN-138	-0.43	R-A-PHE-236	-0.08	L-B-LYS-121	-0.4	R-A-ASN-147	-0.17	L-B-THR-10	-0.05
R-A-LEU-96	-0.48	L-B-ARG-92	-0.42	R-A-LYS-334	-0.07	L-B-ARG-227	-0.33	R-A-VAL-22	-0.12	L-B-TYR-55	-0.05
R-A-SER-298	-0.37	L-B-ALA-2	-0.37	R-A-LYS-17	-0.06	L-B-ARG-258	-0.25	R-A-TYR-195	-0.12	L-B-ILE-65	-0.05
R-A-LEU-275	-0.32	L-B-LYS-189	-0.33	R-A-ILE-160	-0.06	L-B-ILE-52	-0.2	R-A-VAL-185	-0.11	L-B-LEU-16	-0.04
R-A-SER-151	-0.31	L-B-ARG-60	-0.32	R-A-ILE-163	-0.06	L-B-ASN-135	-0.17	R-A-GLY-229	-0.09	L-B-TRP-28	-0.04
R-A-LEU-254	-0.31	L-B-ARG-166	-0.31	R-A-ILE-191	-0.06	L-B-ARG-60	-0.16	R-A-LEU-193	-0.08	L-B-LEU-20	-0.03
R-A-ASN-252	-0.28	L-B-LYS-121	-0.3	R-A-ASN-214	-0.06	L-B-GLN-59	-0.14	R-A-LEU-252	-0.08	L-B-ARG-79	-0.02
R-A-LEU-256	-0.28	L-B-ARG-132	-0.27	R-A-PRO-1	-0.05	L-B-VAL-56	-0.09	R-A-ILE-126	-0.07	L-B-GLY-1	-0.01
R-A-LYS-148	-0.27	L-B-ILE-52	-0.26	R-A-LYS-40	-0.05	L-B-PHE-142	-0.07	R-A-VAL-20	-0.06	L-B-LEU-35	-0.01
R-A-LEU-202	-0.25	L-B-GLY-16	-0.25	R-A-ARG-60	-0.05	L-B-SER-88	-0.06	R-A-TRP-146	-0.05	L-B-ILE-45	-0.01
R-A-SER-177	-0.23	L-B-ARG-227	-0.24	R-A-LYS-315	-0.05	L-B-LEU-58	-0.05	R-A-SER-239	-0.05	L-B-LYS-89	-0.01
R-A-GLN-227	-0.17	L-B-VAL-145	-0.21	R-A-LYS-20	-0.04	L-B-TYR-77	-0.05	R-A-ASP-47	-0.04	L-B-ILE-90	-0.01
R-A-LEU-231	-0.17	L-B-TRP-146	-0.21	R-A-ILE-135	-0.04	L-B-PHE-144	-0.05	R-A-VAL-145	-0.04	L-B-SER-2	0
R-A-ASN-120	-0.16	L-B-ARG-258	-0.19	R-A-LEU-155	-0.04	L-B-ILE-130	-0.04	R-A-ARG-166	-0.04	L-B-ILE-3	0
R-A-ASN-123	-0.15	L-B-ILE-11	-0.17	R-A-PHE-245	-0.04	L-B-TYR-95	-0.03	R-A-ILE-232	-0.04	L-B-PRO-4	0
R-A-SER-172	-0.15	L-B-ALA-18	-0.12	R-A-ILE-249	-0.04	L-B-TYR-82	-0.02	R-A-ILE-11	-0.03	L-B-LEU-29	0
R-A-HIE-233	-0.15	L-B-ILE-130	-0.05	R-A-ARG-311	-0.04	L-B-TRP-146	-0.02	R-A-ASP-37	-0.03	L-B-PHE-46	0
R-A-LEU-277	-0.14	L-B-TRP-103	-0.03	R-A-ARG-354	-0.04	L-B-ALA-6	-0.01	R-A-GLU-50	-0.03	L-B-LEU-63	0
R-A-LEU-69	-0.13	L-B-LEU-131	-0.03	R-A-LYS-449	-0.04	L-B-GLY-8	-0.01	R-A-ASP-54	-0.03	L-B-GLY-74	0
R-A-LEU-122	-0.12	L-B-TYR-55	-0.02	R-A-LYS-477	-0.04	L-B-LEU-24	-0.01	R-A-GLU-89	-0.03	L-B-TYR-77	0
R-A-LEU-150	-0.11	L-B-PRO-102	-0.02	R-A-LYS-30	-0.03	L-B-PRO-26	-0.01	R-A-ASP-100	-0.03	L-B-VAL-80	0
R-A-LEU-174	-0.11	L-B-PRO-104	-0.02	R-A-LYS-43	-0.03	L-B-ASN-29	-0.01	R-A-VAL-128	-0.03	L-B-LEU-81	0
R-A-LEU-176	-0.11	L-B-ILE-148	-0.02	R-A-LYS-126	-0.03	L-B-LEU-34	-0.01	R-A-ASP-140	-0.03	L-B-LEU-88	0
R-A-LEU-204	-0.11	L-B-CYS-3	-0.01	R-A-LYS-127	-0.03	L-B-VAL-35	-0.01	R-A-ASP-141	-0.03	L-B-THR-31	0.01
R-A-ARG-185	-0.09	L-B-VAL-20	-0.01	R-A-MET-183	-0.03	L-B-GLN-41	-0.01	R-A-ASP-153	-0.03	L-B-GLN-32	0.01
R-A-ARG-237	-0.09	L-B-VAL-22	-0.01	R-A-TYR-265	-0.03	L-B-GLY-61	-0.01	R-A-TYR-186	-0.03	L-B-LYS-33	0.01
R-A-LYS-262	-0.09	L-B-ASN-29	-0.01	R-A-LYS-293	-0.03	L-B-ALA-63	-0.01	R-A-ARG-258	-0.03	L-B-THR-75	0.01
R-A-LEU-124	-0.08	L-B-LEU-34	-0.01	R-A-LYS-340	-0.03	L-B-PHE-84	-0.01	R-A-LEU-24	-0.02	L-B-TYR-76	0.01
R-A-ARG-132	-0.08	L-B-LEU-38	-0.01	R-A-LYS-341	-0.03	L-B-VAL-105	-0.01	R-A-ILE-42	-0.02	L-B-MET-78	0.01
R-A-ARG-281	-0.08	L-B-TYR-82	-0.01	R-A-LYS-407	-0.03	L-B-LEU-107	-0.01	R-A-PHE-71	-0.02	L-B-THR-84	0.01
R-A-ILE-152	-0.07	L-B-PHE-84	-0.01	R-A-ARG-408	-0.03	L-B-GLY-117	-0.01	R-A-ALA-127	-0.02	L-B-ASN-86	0.01
R-A-LYS-266	-0.07	L-B-TYR-108	-0.01	R-A-LYS-432	-0.03	L-B-LEU-125	-0.01	R-A-ASN-152	-0.02	L-B-ILE-18	0.02
R-A-LEU-297	-0.07	L-B-GLY-117	-0.01	R-A-LYS-456	-0.03	L-B-VAL-145	-0.01	R-A-PRO-180	-0.02	L-B-ARG-25	0.02
R-A-ARG-75	-0.06	L-B-ASN-23	0	R-A-ARG-527	-0.03	L-B-ILE-148	-0.01	R-A-CYS-187	-0.02	L-B-ILE-34	0.02
R-A-ARG-166	-0.06	L-B-LEU-24	0	R-A-LYS-569	-0.03	L-B-GLN-191	-0.01	R-A-ALA-254	-0.02	L-B-THR-91	0.02
R-A-ARG-223	-0.06	L-B-ALA-25	0	R-A-LYS-69	-0.02	L-B-ALA-2	0	R-A-PRO-12	-0.01	L-B-LEU-92	0.02
R-A-ARG-39	-0.05	L-B-PRO-26	0	R-A-PHE-196	-0.02	L-B-CYS-3	0	R-A-PRO-26	-0.01	L-B-ILE-6	0.03
R-A-LYS-46	-0.05	L-B-ALA-27	0	R-A-ASP-255	-0.02	L-B-THR-5	0	R-A-LEU-38	-0.01	L-B-THR-27	0.03
R-A-ARG-79	-0.05	L-B-VAL-28	0	R-A-ARG-262	-0.02	L-B-ASN-7	0	R-A-PHE-43	-0.01	L-B-HIE-30	0.03
R-A-ARG-86	-0.05	L-B-VAL-30	0	R-A-LYS-326	-0.02	L-B-THR-9	0	R-A-PHE-84	-0.01	L-B-GLU-87	0.03
R-A-LEU-98	-0.05	L-B-GLY-31	0	R-A-ARG-374	-0.02	L-B-ALA-10	0	R-A-TRP-103	-0.01	L-B-THR-44	0.04
R-A-ALA-153	-0.05	L-B-GLN-32	0	R-A-LYS-420	-0.02	L-B-ILE-11	0	R-A-LEU-129	-0.01	L-B-LEU-56	0.04
R-A-LYS-17	-0.04	L-B-ASN-33	0	R-A-ARG-493	-0.02	L-B-ILE-13	0	R-A-ILE-130	-0.01	L-B-GLU-85	0.04
R-A-ARG-47	-0.04	L-B-VAL-35	0	R-A-LYS-532	-0.02	L-B-ALA-18	0	R-A-LEU-131	-0.01	L-B-THR-42	0.05
R-A-LYS-62	-0.04	L-B-VAL-36	0	R-A-LYS-540	-0.02	L-B-VAL-20	0	R-A-ILE-148	-0.01	L-B-ASP-5	0.06
R-A-LYS-195	-0.04	L-B-VAL-56	0	R-A-LYS-560	-0.02	L-B-TYR-21	0	R-A-VAL-154	-0.01	L-B-ARG-24	0.06
R-A-SER-273	-0.04	L-B-THR-57	0	R-A-LYS-566	-0.02	L-B-VAL-22	0	R-A-TYR-196	-0.01	L-B-ARG-82	0.06
R-A-ARG-284	-0.04	L-B-SER-62	0	R-A-PRO-86	-0.01	L-B-ASN-23	0	R-A-LEU-197	-0.01	L-B-VAL-94	0.06
R-A-ALA-30	-0.03	L-B-ALA-63	0	R-A-PHE-90	-0.01	L-B-ALA-25	0	R-A-PHE-209	-0.01	L-B-TYR-23	0.07
R-A-PRO-1	-0.02	L-B-GLY-66	0	R-A-GLU-115	-0.01	L-B-ALA-27	0	R-A-PHE-276	-0.01	L-B-GLU-36	0.07
R-A-PRO-180	-0.02	L-B-VAL-67	0	R-A-PHE-117	-0.01	L-B-VAL-28	0	R-A-ILE-13	0	L-B-ASN-38	0.07
R-A-ARG-205	-0.02	L-B-LEU-68	0	R-A-PRO-141	-0.01	L-B-VAL-36	0	R-A-VAL-27	0	L-B-SER-48	0.07
R-A-TRP-247	-0.02	L-B-SER-69	0	R-A-GLU-173	-0.01	L-B-LEU-38	0	R-A-VAL-28	0	L-B-GLU-49	0.07
R-A-LEU-261	-0.02	L-B-SER-70	0	R-A-ASP-193	-0.01	L-B-SER-39	0	R-A-ASN-29	0	L-B-LYS-73	0.07
R-A-LEU-299	-0.02	L-B-PHE-71	0	R-A-ARG-230	-0.01	L-B-THR-40	0	R-A-VAL-30	0	L-B-GLU-83	0.08
R-A-GLY-301	-0.02	L-B-SER-72	0	R-A-VAL-274	-0.01	L-B-ILE-42	0	R-A-GLY-31	0	L-B-GLY-61	0.09
R-A-LEU-4	-0.01	L-B-GLY-73	0	R-A-LYS-300	-0.01	L-B-GLY-65	0	R-A-GLN-32	0	L-B-LYS-70	0.09
R-A-LEU-34	-0.01	L-B-THR-74	0	R-A-CYS-2	0	L-B-GLY-66	0	R-A-ASN-33	0	L-B-HIE-19	0.11
R-A-ALA-73	-0.01	L-B-VAL-75	0	R-A-ILE-3	0	L-B-VAL-67	0	R-A-VAL-36	0	L-B-GLU-93	0.11
R-A-TRP-129	-0.01	L-B-TYR-77	0	R-A-VAL-5	0	L-B-LEU-68	0	R-A-SER-39	0	L-B-SER-41	0.12
R-A-TRP-135	-0.01	L-B-GLY-79	0	R-A-VAL-6	0	L-B-SER-72	0	R-A-CYS-44	0	L-B-GLY-21	0.13
R-A-LEU-158	-0.01	L-B-SER-80	0	R-A-PRO-7	0	L-B-PRO-83	0	R-A-HIE-45	0	L-B-VAL-54	0.14
R-A-PHE-160	-0.01	L-B-PRO-85	0	R-A-ASN-8	0	L-B-VAL-93	0	R-A-ASN-46	0	L-B-ASN-7	0.23
R-A-ILE-188	-0.01	L-B-THR-86	0	R-A-ILE-9	0	L-B-TRP-103	0	R-A-TYR-48	0	L-B-ALA-8	0.23
R-A-PRO-212	-0.01	L-B-PRO-91	0	R-A-THR-10	0	L-B-PRO-104	0	R-A-PRO-49	0	L-B-GLU-47	0.23
R-A-SER-213	-0.01	L-B-VAL-105	0	R-A-TYR-11	0	L-B-ALA-106	0	R-A-THR-51	0	L-B-THR-15	0.26
R-A-ALA-220	-0.01	L-B-ALA-106	0	R-A-GLN-12	0	L-B-TYR-108	0	R-A-ILE-52	0	L-B-LYS-51	0.28
R-A-LEU-282	-0.01	L-B-LEU-107	0	R-A-CYS-13	0	L-B-LEU-109	0	R-A-THR-53	0	L-B-SER-66	0.33
R-A-PRO-303	-0.01	L-B-LEU-109	0	R-A-MET-14	0	L-B-THR-110	0	R-A-TYR-55	0	L-B-GLY-52	0.34
R-A-PHE-304	-0.01	L-B-THR-110	0	R-A-GLN-16	0	L-B-PRO-111	0	R-A-VAL-56	0	L-B-HIE-64	0.4
R-A-PHE-13	0	L-B-PRO-111	0	R-A-LEU-18	0	L-B-VAL-112	0	R-A-THR-57	0	L-B-GLU-71	0.42
R-A-SER-14	0	L-B-VAL-112	0	R-A-SER-19	0	L-B-SER-113	0	R-A-LEU-58	0	L-B-ARG-53	0.61
R-A-PRO-16	0	L-B-SER-113	0	R-A-VAL-21	0	L-B-SER-114	0	R-A-ALA-62	0	L-B-GLU-58	0.73
R-A-PRO-18	0	L-B-SER-114	0	R-A-PRO-22	0	L-B-ALA-115	0	R-A-SER-72	0	L-B-LYS-43	0.95
R-A-TRP-20	0	L-B-ALA-115	0	R-A-ILE-25	0	L-B-GLY-116	0	R-A-GLY-73	0	L-B-ASP-96	1.2
R-A-SER-21	0	L-B-GLY-116	0	R-A-PRO-26	0	L-B-VAL-118	0	R-A-THR-74	0	L-B-LYS-17	1.66
R-A-SER-22	0	L-B-VAL-118	0	R-A-SER-27	0	L-B-ALA-119	0	R-A-VAL-75	0
R-A-ALA-23	0	L-B-ALA-119	0	R-A-SER-28	0	L-B-ILE-120	0	R-A-TYR-77	0
R-A-PHE-24	0	L-B-ILE-120	0	R-A-THR-29	0	L-B-ALA-122	0	R-A-ASN-78	0
R-A-TYR-35	0	L-B-ALA-122	0	R-A-ASN-31	0	L-B-GLY-123	0	R-A-GLY-79	0
R-A-GLY-36	0	L-B-LEU-125	0	R-A-ILE-32	0	L-B-SER-124	0	R-A-SER-80	0
R-A-GLY-37	0	L-B-ILE-126	0	R-A-LEU-34	0	L-B-ILE-126	0	R-A-SER-81	0
R-A-GLY-38	0	L-B-ALA-150	0	R-A-SER-35	0	L-B-ALA-127	0	R-A-TYR-82	0
R-A-SER-40	0	L-B-ASN-152	0	R-A-PHE-36	0	L-B-TYR-149	0	R-A-PRO-83	0
R-A-LEU-41	0	L-B-VAL-154	0	R-A-ASN-37	0	L-B-ALA-150	0	R-A-PRO-85	0
R-A-TYR-43	0	L-B-VAL-155	0	R-A-PRO-38	0	L-B-ASN-151	0	R-A-THR-86	0
R-A-LEU-44	0	L-B-VAL-156	0	R-A-LEU-39	0	L-B-VAL-154	0	R-A-THR-87	0
R-A-LEU-45	0	L-B-PRO-157	0	R-A-ILE-41	0	L-B-VAL-155	0	R-A-SER-88	0
R-A-VAL-48	0	L-B-THR-158	0	R-A-LEU-42	0	L-B-VAL-156	0	R-A-THR-90	0
R-A-THR-50	0	L-B-GLY-159	0	R-A-SER-44	0	L-B-PRO-157	0	R-A-PRO-91	0
R-A-ALA-52	0	L-B-GLY-160	0	R-A-TYR-45	0	L-B-THR-158	0	R-A-VAL-93	0
R-A-LEU-54	0	L-B-CYS-161	0	R-A-SER-46	0	L-B-GLY-159	0	R-A-VAL-94	0
R-A-GLY-55	0	L-B-VAL-163	0	R-A-PHE-47	0	L-B-GLY-160	0	R-A-TYR-95	0
R-A-GLN-56	0	L-B-SER-164	0	R-A-SER-48	0	L-B-CYS-161	0	R-A-ASN-96	0
R-A-PHE-57	0	L-B-ALA-165	0	R-A-ASN-49	0	L-B-VAL-163	0	R-A-SER-97	0
R-A-THR-58	0	L-B-VAL-168	0	R-A-PHE-50	0	L-B-SER-164	0	R-A-THR-99	0
R-A-ILE-60	0	L-B-THR-169	0	R-A-SER-51	0	L-B-ALA-165	0	R-A-PRO-102	0
R-A-ILE-61	0	L-B-VAL-170	0	R-A-LEU-53	0	L-B-VAL-168	0	R-A-PRO-104	0
R-A-ALA-74	0	L-B-THR-171	0	R-A-GLN-54	0	L-B-THR-169	0	R-A-LEU-107	0
R-A-ILE-76	0	L-B-LEU-172	0	R-A-TRP-55	0	L-B-VAL-170	0	R-A-TYR-108	0
R-A-PRO-77	0	L-B-PRO-173	0	R-A-LEU-56	0	L-B-THR-171	0	R-A-LEU-109	0
R-A-SER-78	0	L-B-TYR-175	0	R-A-LEU-58	0	L-B-LEU-172	0	R-A-PRO-111	0
R-A-ILE-80	0	L-B-PRO-176	0	R-A-CYS-61	0	L-B-PRO-173	0	R-A-VAL-112	0
R-A-LEU-81	0	L-B-GLY-177	0	R-A-ILE-63	0	L-B-TYR-175	0	R-A-GLN-133	0
R-A-PHE-82	0	L-B-SER-178	0	R-A-ILE-66	0	L-B-PRO-176	0	R-A-THR-134	0
R-A-GLY-83	0	L-B-VAL-179	0	R-A-ALA-70	0	L-B-GLY-177	0	R-A-ASN-135	0
R-A-LEU-85	0	L-B-PRO-180	0	R-A-TRP-71	0	L-B-SER-178	0	R-A-ASN-136	0
R-A-GLY-89	0	L-B-ILE-181	0	R-A-HIE-72	0	L-B-VAL-179	0	R-A-TYR-137	0
R-A-ILE-90	0	L-B-PRO-182	0	R-A-GLY-73	0	L-B-PRO-180	0	R-A-ASN-138	0
R-A-VAL-103	0	L-B-LEU-183	0	R-A-LEU-74	0	L-B-ILE-181	0	R-A-SER-139	0
R-A-THR-104	0	L-B-THR-184	0	R-A-HIE-75	0	L-B-PRO-182	0	R-A-VAL-155	0
R-A-GLY-105	0	L-B-VAL-185	0	R-A-HIE-76	0	L-B-LEU-183	0	R-A-VAL-156	0
R-A-THR-106	0	L-B-TYR-186	0	R-A-LEU-77	0	L-B-THR-184	0	R-A-PRO-157	0
R-A-ALA-107	0	L-B-CYS-187	0	R-A-SER-78	0	L-B-VAL-185	0	R-A-LEU-172	0
R-A-PRO-108	0	L-B-ALA-188	0	R-A-ASN-79	0	L-B-TYR-186	0	R-A-PRO-173	0
R-A-PRO-109	0	L-B-SER-190	0	R-A-LEU-80	0	L-B-CYS-187	0	R-A-TYR-175	0
R-A-PRO-110	0	L-B-GLN-191	0	R-A-ILE-81	0	L-B-ALA-188	0	R-A-PRO-176	0
R-A-LEU-111	0	L-B-ASN-192	0	R-A-LEU-82	0	L-B-SER-190	0	R-A-SER-198	0
R-A-LEU-112	0	L-B-LEU-193	0	R-A-SER-91	0	L-B-ASN-192	0	R-A-GLY-199	0
R-A-ALA-114	0	L-B-GLY-194	0	R-A-PRO-92	0	L-B-LEU-193	0	R-A-THR-200	0
R-A-ASN-126	0	L-B-TYR-195	0	R-A-GLY-93	0	L-B-GLY-194	0	R-A-THR-201	0
R-A-SER-128	0	L-B-TYR-196	0	R-A-SER-94	0	L-B-TYR-195	0	R-A-ALA-202	0
R-A-ALA-130	0	L-B-LEU-197	0	R-A-PHE-95	0	L-B-TYR-196	0	R-A-ALA-204	0
R-A-THR-131	0	L-B-SER-198	0	R-A-SER-96	0	L-B-LEU-197	0	R-A-ASN-206	0
R-A-ALA-134	0	L-B-GLY-199	0	R-A-GLY-97	0	L-B-SER-198	0	R-A-ILE-208	0
R-A-LEU-136	0	L-B-THR-200	0	R-A-LEU-98	0	L-B-GLY-199	0	R-A-THR-210	0
R-A-ALA-137	0	L-B-THR-201	0	R-A-THR-99	0	L-B-THR-200	0	R-A-ASN-211	0
R-A-GLN-141	0	L-B-ALA-202	0	R-A-SER-100	0	L-B-THR-201	0	R-A-THR-212	0
R-A-HIE-156	0	L-B-ALA-204	0	R-A-LEU-101	0	L-B-ALA-202	0	R-A-ALA-213	0
R-A-ASN-159	0	L-B-GLY-205	0	R-A-LEU-104	0	L-B-ALA-204	0	R-A-SER-214	0
R-A-SER-161	0	L-B-ASN-206	0	R-A-LEU-111	0	L-B-GLY-205	0	R-A-PHE-215	0
R-A-CYS-162	0	L-B-SER-207	0	R-A-LEU-114	0	L-B-ASN-206	0	R-A-SER-216	0
R-A-GLN-164	0	L-B-ILE-208	0	R-A-PRO-118	0	L-B-SER-207	0	R-A-PRO-217	0
R-A-LEU-191	0	L-B-PHE-209	0	R-A-ILE-119	0	L-B-ILE-208	0	R-A-ALA-218	0
R-A-PRO-193	0	L-B-THR-210	0	R-A-GLY-120	0	L-B-PHE-209	0	R-A-GLN-219	0
R-A-SER-217	0	L-B-ASN-211	0	R-A-GLN-121	0	L-B-THR-210	0	R-A-GLY-220	0
R-A-LEU-219	0	L-B-THR-212	0	R-A-LEU-122	0	L-B-ASN-211	0	R-A-VAL-221	0
R-A-ALA-221	0	L-B-ALA-213	0	R-A-ILE-123	0	L-B-THR-212	0	R-A-GLY-222	0
R-A-ALA-239	0	L-B-SER-214	0	R-A-THR-124	0	L-B-ALA-213	0	R-A-PRO-233	0
R-A-ALA-240	0	L-B-PHE-215	0	R-A-LEU-125	0	L-B-SER-214	0	R-A-TYR-256	0
R-A-GLY-241	0	L-B-SER-216	0	R-A-LEU-140	0	L-B-PHE-215	0	R-A-ALA-257	0
R-A-ALA-242	0	L-B-PRO-217	0	R-A-ALA-142	0	L-B-SER-216	0	R-A-THR-259	0
R-A-PRO-243	0	L-B-ALA-218	0	R-A-TYR-143	0	L-B-PRO-217	0	R-A-GLY-260	0
R-A-SER-244	0	L-B-GLN-219	0	R-A-PHE-144	0	L-B-ALA-218	0	R-A-GLY-261	0
R-A-PRO-265	0	L-B-GLY-220	0	R-A-SER-145	0	L-B-GLN-219	0	R-A-GLN-262	0
R-A-PRO-286	0	L-B-VAL-221	0	R-A-ASN-146	0	L-B-GLY-220	0	R-A-VAL-263	0
R-A-LEU-305	0	L-B-GLY-222	0	R-A-LEU-147	0	L-B-VAL-221	0	R-A-THR-264	0
R-A-SER-307	0	L-B-VAL-223	0	R-A-THR-148	0	L-B-GLY-222	0	R-A-ALA-265	0
R-A-CYS-2	0.01	L-B-GLN-224	0	R-A-ASN-149	0	L-B-VAL-223	0	R-A-GLY-266	0
R-A-CYS-9	0.01	L-B-LEU-225	0	R-A-LEU-150	0	L-B-GLN-224	0	R-A-ASN-267	0
R-A-CYS-11	0.01	L-B-THR-226	0	R-A-VAL-151	0	L-B-LEU-225	0	R-A-VAL-268	0
R-A-ASN-12	0.01	L-B-ASN-228	0	R-A-VAL-165	0	L-B-THR-226	0	R-A-GLN-269	0
R-A-ASN-25	0.01	L-B-GLY-229	0	R-A-ASP-167	0	L-B-ASN-228	0	R-A-SER-270	0
R-A-CYS-26	0.01	L-B-THR-230	0	R-A-LEU-168	0	L-B-GLY-229	0	R-A-ILE-271	0
R-A-LEU-27	0.01	L-B-ILE-231	0	R-A-GLN-169	0	L-B-THR-230	0	R-A-ILE-272	0
R-A-VAL-32	0.01	L-B-ILE-232	0	R-A-PHE-170	0	L-B-ILE-231	0	R-A-ALA-2	0.01
R-A-SER-63	0.01	L-B-PRO-233	0	R-A-LEU-171	0	L-B-ILE-232	0	R-A-CYS-3	0.01
R-A-VAL-71	0.01	L-B-ALA-234	0	R-A-ASN-174	0	L-B-PRO-233	0	R-A-GLY-14	0.01
R-A-ALA-84	0.01	L-B-ASN-235	0	R-A-PRO-175	0	L-B-ALA-234	0	R-A-LEU-34	0.01
R-A-VAL-87	0.01	L-B-ASN-236	0	R-A-GLN-176	0	L-B-ASN-235	0	R-A-GLN-59	0.01
R-A-LEU-101	0.01	L-B-THR-237	0	R-A-VAL-177	0	L-B-ASN-236	0	R-A-LEU-68	0.01
R-A-THR-115	0.01	L-B-VAL-238	0	R-A-ASN-178	0	L-B-THR-237	0	R-A-VAL-105	0.01
R-A-VAL-127	0.01	L-B-SER-239	0	R-A-LEU-179	0	L-B-VAL-238	0	R-A-ALA-106	0.01
R-A-GLN-140	0.01	L-B-LEU-240	0	R-A-GLN-192	0	L-B-SER-239	0	R-A-THR-110	0.01
R-A-ALA-155	0.01	L-B-GLY-241	0	R-A-GLN-197	0	L-B-LEU-240	0	R-A-SER-113	0.01
R-A-VAL-165	0.01	L-B-ALA-242	0	R-A-GLY-198	0	L-B-GLY-241	0	R-A-PHE-142	0.01
R-A-PHE-168	0.01	L-B-VAL-243	0	R-A-ILE-199	0	L-B-ALA-242	0	R-A-GLY-159	0.01
R-A-LEU-171	0.01	L-B-GLY-244	0	R-A-LYS-200	0	L-B-VAL-243	0	R-A-GLY-160	0.01
R-A-LEU-182	0.01	L-B-THR-245	0	R-A-LEU-201	0	L-B-GLY-244	0	R-A-VAL-168	0.01
R-A-GLY-183	0.01	L-B-SER-246	0	R-A-HIE-202	0	L-B-THR-245	0	R-A-VAL-170	0.01
R-A-GLY-186	0.01	L-B-ALA-247	0	R-A-CYS-219	0	L-B-ALA-247	0	R-A-ASP-174	0.01
R-A-LEU-187	0.01	L-B-VAL-248	0	R-A-LEU-223	0	L-B-VAL-248	0	R-A-PRO-182	0.01
R-A-SER-189	0.01	L-B-SER-249	0	R-A-ALA-224	0	L-B-SER-249	0	R-A-GLY-205	0.01
R-A-CYS-192	0.01	L-B-LEU-250	0	R-A-GLY-225	0	L-B-LEU-250	0	R-A-SER-207	0.01
R-A-PHE-196	0.01	L-B-GLY-251	0	R-A-LEU-226	0	L-B-GLY-251	0	R-A-VAL-223	0.01
R-A-GLY-208	0.01	L-B-LEU-252	0	R-A-HIE-227	0	L-B-LEU-252	0	R-A-ALA-234	0.01
R-A-GLY-214	0.01	L-B-THR-253	0	R-A-VAL-228	0	L-B-THR-253	0	R-A-ASN-235	0.01
R-A-CYS-216	0.01	L-B-ALA-254	0	R-A-HIE-229	0	L-B-ALA-254	0	R-A-GLY-273	0.01
R-A-LEU-236	0.01	L-B-ASN-255	0	R-A-PRO-247	0	L-B-ASN-255	0	R-A-VAL-274	0.01
R-A-CYS-245	0.01	L-B-TYR-256	0	R-A-MET-250	0	L-B-TYR-256	0	R-A-ALA-25	0.02
R-A-PRO-248	0.01	L-B-ALA-257	0	R-A-GLU-251	0	L-B-ALA-257	0	R-A-VAL-35	0.02
R-A-VAL-264	0.01	L-B-THR-259	0	R-A-LEU-253	0	L-B-THR-259	0	R-A-THR-40	0.02
R-A-PRO-269	0.01	L-B-GLY-260	0	R-A-CYS-254	0	L-B-GLY-260	0	R-A-GLY-61	0.02
R-A-ASN-280	0.01	L-B-GLY-261	0	R-A-VAL-256	0	L-B-GLY-261	0	R-A-VAL-67	0.02
R-A-SER-287	0.01	L-B-GLN-262	0	R-A-THR-257	0	L-B-GLN-262	0	R-A-LYS-76	0.02
R-A-PRO-288	0.01	L-B-VAL-263	0	R-A-ILE-258	0	L-B-VAL-263	0	R-A-ARG-92	0.02
R-A-SER-10	0.02	L-B-THR-264	0	R-A-ASP-259	0	L-B-THR-264	0	R-A-PHE-144	0.02
R-A-THR-70	0.02	L-B-ALA-265	0	R-A-PHE-261	0	L-B-ALA-265	0	R-A-THR-158	0.02
R-A-LEU-88	0.02	L-B-GLY-266	0	R-A-PHE-269	0	L-B-GLY-266	0	R-A-ALA-165	0.02
R-A-ASN-100	0.02	L-B-ASN-267	0	R-A-ILE-273	0	L-B-ASN-267	0	R-A-THR-169	0.02
R-A-LEU-139	0.02	L-B-VAL-268	0	R-A-LYS-275	0	L-B-VAL-268	0	R-A-THR-171	0.02
R-A-TRP-142	0.02	L-B-GLN-269	0	R-A-PHE-276	0	L-B-GLN-269	0	R-A-GLY-177	0.02
R-A-SER-157	0.02	L-B-SER-270	0	R-A-HIE-277	0	L-B-SER-270	0	R-A-VAL-179	0.02
R-A-PRO-169	0.02	L-B-ILE-271	0	R-A-CYS-278	0	L-B-ILE-271	0	R-A-ALA-188	0.02
R-A-LEU-194	0.02	L-B-ILE-272	0	R-A-LEU-279	0	L-B-ILE-272	0	R-A-GLY-194	0.02
R-A-ALA-207	0.02	L-B-GLY-273	0	R-A-ALA-280	0	L-B-GLY-273	0	R-A-THR-275	0.02
R-A-ALA-218	0.02	L-B-VAL-274	0	R-A-ASN-281	0	L-B-VAL-274	0	R-A-VAL-277	0.02
R-A-ALA-222	0.02	L-B-THR-275	0	R-A-VAL-282	0	L-B-THR-275	0	R-A-ALA-6	0.03
R-A-SER-235	0.02	L-B-PHE-276	0	R-A-SER-283	0	L-B-PHE-276	0	R-A-GLY-15	0.03
R-A-GLN-263	0.02	L-B-VAL-277	0	R-A-ALA-284	0	L-B-VAL-277	0	R-A-ALA-18	0.03
R-A-GLY-267	0.02	L-B-TYR-278	0	R-A-MET-285	0	L-B-TYR-278	0	R-A-GLY-66	0.03
R-A-GLY-28	0.03	L-B-CYS-44	0.01	R-A-SER-286	0	L-B-GLY-15	0.01	R-A-ARG-98	0.03
R-A-ALA-29	0.03	L-B-TYR-64	0.01	R-A-LEU-287	0	L-B-SER-17	0.01	R-A-LYS-101	0.03
R-A-ASP-59	0.03	L-B-GLY-65	0.01	R-A-ILE-292	0	L-B-ASN-19	0.01	R-A-SER-114	0.03
R-A-LEU-64	0.03	L-B-SER-81	0.01	R-A-TYR-294	0	L-B-VAL-30	0.01	R-A-ALA-115	0.03
R-A-GLY-116	0.03	L-B-PRO-83	0.01	R-A-LEU-295	0	L-B-GLY-31	0.01	R-A-ARG-132	0.03
R-A-PRO-117	0.03	L-B-THR-90	0.01	R-A-VAL-298	0	L-B-GLN-32	0.01	R-A-CYS-161	0.03
R-A-PRO-145	0.03	L-B-GLY-123	0.01	R-A-PRO-299	0	L-B-ASN-33	0.01	R-A-GLN-224	0.03
R-A-ASN-179	0.03	L-B-SER-124	0.01	R-A-HIE-301	0	L-B-PHE-43	0.01	R-A-TYR-278	0.03
R-A-ASN-285	0.03	L-B-ALA-127	0.01	R-A-PHE-302	0	L-B-CYS-44	0.01	R-A-ALA-10	0.04
R-A-PRO-292	0.03	L-B-TYR-149	0.01	R-A-LYS-303	0	L-B-TYR-64	0.01	R-A-SER-17	0.04
R-A-ASP-19	0.04	L-B-ASN-151	0.01	R-A-TRP-304	0	L-B-SER-69	0.01	R-A-GLN-143	0.04
R-A-ASP-53	0.04	L-B-LEU-58	0.02	R-A-GLN-305	0	L-B-SER-70	0.01	R-A-ILE-231	0.04
R-A-ARG-72	0.04	L-B-GLY-61	0.02	R-A-SER-306	0	L-B-PHE-71	0.01	R-A-VAL-238	0.04
R-A-LEU-143	0.04	L-B-THR-87	0.02	R-A-LEU-307	0	L-B-THR-74	0.01	R-A-ASN-255	0.04
R-A-LYS-144	0.04	L-B-SER-88	0.02	R-A-SER-308	0	L-B-VAL-128	0.01	R-A-PHE-1	0.05
R-A-ALA-190	0.04	L-B-VAL-128	0.02	R-A-ILE-309	0	L-B-ASN-152	0.01	R-A-GLY-8	0.05
R-A-MET-209	0.04	L-B-LEU-129	0.02	R-A-ILE-310	0	L-B-SER-246	0.01	R-A-ARG-60	0.05
R-A-VAL-215	0.04	L-B-THR-134	0.02	R-A-CYS-312	0	L-B-PRO-12	0.02	R-A-ILE-120	0.05
R-A-GLY-260	0.04	L-B-ALA-6	0.03	R-A-LEU-314	0	L-B-GLY-16	0.02	R-A-ASP-167	0.05
R-A-LEU-268	0.04	L-B-TYR-21	0.03	R-A-GLN-316	0	L-B-GLY-73	0.02	R-A-LEU-225	0.05
R-A-ALA-270	0.04	L-B-VAL-93	0.03	R-A-PHE-317	0	L-B-VAL-75	0.02	R-A-GLY-16	0.06
R-A-LEU-291	0.04	L-B-THR-40	0.04	R-A-PRO-318	0	L-B-ASN-147	0.02	R-A-ASN-23	0.06
R-A-ASP-15	0.05	L-B-GLN-41	0.04	R-A-THR-319	0	L-B-TYR-48	0.03	R-A-GLN-41	0.06
R-A-ASP-49	0.05	L-B-ILE-42	0.04	R-A-LEU-320	0	L-B-SER-62	0.03	R-A-VAL-118	0.06
R-A-GLU-51	0.05	L-B-PHE-43	0.04	R-A-LEU-322	0	L-B-SER-97	0.03	R-A-ALA-163	0.06
R-A-SER-91	0.05	L-B-ASN-78	0.04	R-A-PRO-323	0	L-B-GLY-14	0.04	R-A-LYS-189	0.06
R-A-GLY-92	0.05	L-B-THR-5	0.05	R-A-PHE-324	0	L-B-GLY-79	0.04	R-A-GLY-244	0.06
R-A-GLN-154	0.05	L-B-SER-39	0.05	R-A-LEU-325	0	L-B-PRO-102	0.04	R-A-ALA-63	0.07
R-A-VAL-167	0.05	L-B-ASN-7	0.09	R-A-SER-327	0	L-B-LEU-129	0.04	R-A-TYR-64	0.07
R-A-PRO-197	0.05	L-B-ASN-147	0.09	R-A-LEU-328	0	L-B-PRO-85	0.05	R-A-SER-69	0.07
R-A-THR-198	0.05	L-B-ASN-19	0.1	R-A-THR-329	0	L-B-THR-99	0.05	R-A-SER-70	0.07
R-A-THR-211	0.05	L-B-ASN-135	0.1	R-A-LEU-330	0	L-B-HIE-45	0.07	R-A-GLY-117	0.07
R-A-GLU-3	0.06	L-B-THR-9	0.11	R-A-THR-331	0	L-B-THR-51	0.07	R-A-ASP-162	0.07
R-A-GLU-42	0.06	L-B-GLN-59	0.12	R-A-MET-332	0	L-B-ASN-96	0.09	R-A-SER-178	0.07
R-A-ASN-234	0.06	L-B-VAL-94	0.13	R-A-ASN-333	0	L-B-THR-86	0.11	R-A-ASP-203	0.07
R-A-THR-259	0.06	L-B-ASN-136	0.15	R-A-GLY-335	0	L-B-LEU-131	0.11	R-A-THR-5	0.08
R-A-SER-65	0.07	L-B-THR-53	0.17	R-A-SER-336	0	L-B-SER-81	0.12	R-A-GLY-116	0.08
R-A-GLU-102	0.07	L-B-LYS-101	0.18	R-A-ILE-337	0	L-B-ASN-46	0.13	R-A-ALA-119	0.08
R-A-GLU-113	0.07	L-B-TYR-95	0.19	R-A-SER-338	0	L-B-SER-80	0.13	R-A-SER-164	0.08
R-A-ASN-302	0.07	L-B-THR-51	0.21	R-A-PHE-339	0	L-B-PRO-49	0.15	R-A-ILE-181	0.08
R-A-SER-8	0.08	L-B-ASP-203	0.21	R-A-VAL-342	0	L-B-GLN-143	0.15	R-A-LEU-183	0.08
R-A-LEU-66	0.08	L-B-ASP-174	0.22	R-A-ALA-343	0	L-B-THR-90	0.18	R-A-GLN-191	0.08
R-A-GLU-138	0.08	L-B-ASP-100	0.24	R-A-LEU-344	0	L-B-ASN-78	0.19	R-A-ASN-236	0.08
R-A-GLU-163	0.08	L-B-GLY-8	0.26	R-A-PRO-345	0	L-B-ASP-174	0.27	R-A-THR-253	0.11
R-A-ASP-289	0.08	L-B-GLN-279	0.27	R-A-SER-346	0	L-B-ASP-203	0.29	R-A-LYS-4	0.12
R-A-ASP-5	0.09	L-B-ASP-167	0.28	R-A-LEU-347	0	L-B-THR-87	0.33	R-A-ASN-7	0.13
R-A-ASP-133	0.09	L-B-ASP-153	0.32	R-A-SER-348	0	L-B-ASP-167	0.36	R-A-GLY-65	0.13
R-A-ALA-170	0.09	L-B-ASP-162	0.32	R-A-TYR-349	0	L-B-GLN-279	0.4	R-A-THR-226	0.14
R-A-VAL-224	0.09	L-B-ASN-46	0.35	R-A-LEU-350	0	L-B-ASP-153	0.41	R-A-THR-237	0.14
R-A-ASP-283	0.09	L-B-ASP-141	0.37	R-A-LEU-352	0	L-B-ASP-162	0.43	R-A-THR-9	0.15
R-A-GLY-146	0.1	L-B-GLN-133	0.4	R-A-SER-353	0	L-B-GLN-133	0.45	R-A-SER-190	0.15
R-A-GLU-210	0.1	L-B-ASP-37	0.46	R-A-ASN-355	0	L-B-ASP-37	0.6	R-A-THR-230	0.15
R-A-ASP-306	0.1	L-B-GLU-89	0.57	R-A-ALA-356	0	L-B-ASP-100	0.63	R-A-THR-245	0.15
R-A-GLU-184	0.11	L-B-ASP-54	1.08	R-A-LEU-357	0	L-B-ASP-47	0.71	R-A-THR-184	0.2
R-A-ASP-238	0.11	L-B-ASP-47	1.35	R-A-SER-358	0	L-B-ASP-140	0.85	R-A-ASN-192	0.21
R-A-SER-249	0.11	L-B-LYS-4	1.39	R-A-PHE-359	0	L-B-GLU-50	1.04	R-A-SER-246	0.38
R-A-GLN-293	0.11	L-B-PHE-1	2.38	R-A-SER-360	0	L-B-ASP-54	1.08	R-A-GLN-279	0.46
R-A-GLU-181	0.12	L-B-ASP-140	2.79	R-A-GLY-361	0	L-B-ASP-141	1.57	R-A-ARG-227	0.81
R-A-ASN-206	0.12			R-A-CYS-362	0
R-A-GLU-290	0.12			R-A-CYS-363	0
R-A-ASP-246	0.13			R-A-SER-364	0
R-A-GLU-308	0.13			R-A-TYR-365	0
R-A-LEU-93	0.15			R-A-SER-366	0
R-A-ASP-230	0.15			R-A-LEU-368	0
R-A-LEU-251	0.17			R-A-GLY-369	0
R-A-ARG-125	0.18			R-A-THR-370	0
R-A-LEU-147	0.18			R-A-ASN-371	0
R-A-GLU-6	0.19			R-A-SER-372	0
R-A-LEU-119	0.19			R-A-LEU-373	0
R-A-VAL-294	0.19			R-A-HIE-375	0
R-A-LEU-272	0.24			R-A-LEU-376	0
R-A-ASP-31	0.25			R-A-LEU-378	0
R-A-LEU-226	0.26			R-A-SER-379	0
R-A-LEU-199	0.28			R-A-PHE-380	0
R-A-GLU-95	0.29			R-A-ASN-381	0
R-A-ASP-118	0.29			R-A-GLY-382	0
R-A-GLY-295	0.34			R-A-ALA-383	0
R-A-GLU-33	0.35			R-A-ILE-384	0
R-A-GLN-225	0.35			R-A-ILE-385	0
R-A-GLN-250	0.36			R-A-MET-386	0
R-A-LYS-271	0.36			R-A-SER-387	0
R-A-GLU-7	0.39			R-A-ALA-388	0
R-A-LYS-67	0.4			R-A-ASN-389	0
R-A-GLU-99	0.43			R-A-PHE-390	0
R-A-LYS-300	0.53			R-A-MET-391	0
R-A-ASP-178	0.65			R-A-GLY-392	0
R-A-ASP-276	1.95			R-A-LEU-393	0
				R-A-LEU-396	0
				R-A-GLN-397	0
				R-A-HIE-398	0
				R-A-LEU-399	0
				R-A-PHE-401	0
				R-A-GLN-402	0
				R-A-HIE-403	0
				R-A-SER-404	0
				R-A-THR-405	0
				R-A-LEU-406	0
				R-A-VAL-409	0
				R-A-THR-410	0
				R-A-PHE-412	0
				R-A-SER-413	0
				R-A-ALA-414	0
				R-A-PHE-415	0
				R-A-LEU-416	0
				R-A-SER-417	0
				R-A-LEU-418	0
				R-A-LEU-421	0
				R-A-LEU-422	0
				R-A-TYR-423	0
				R-A-LEU-424	0
				R-A-ILE-426	0
				R-A-SER-427	0
				R-A-TYR-428	0
				R-A-THR-429	0
				R-A-ASN-430	0
				R-A-THR-431	0
				R-A-ILE-433	0
				R-A-PHE-435	0
				R-A-GLY-437	0
				R-A-ILE-438	0
				R-A-PHE-439	0
				R-A-LEU-440	0
				R-A-GLY-441	0
				R-A-LEU-442	0
				R-A-THR-443	0
				R-A-SER-444	0
				R-A-LEU-445	0
				R-A-ASN-446	0
				R-A-THR-447	0
				R-A-LEU-448	0
				R-A-MET-450	0
				R-A-ALA-451	0
				R-A-GLY-452	0
				R-A-ASN-453	0
				R-A-SER-454	0
				R-A-PHE-455	0
				R-A-ASN-458	0
				R-A-THR-459	0
				R-A-LEU-460	0
				R-A-SER-461	0
				R-A-ASN-462	0
				R-A-VAL-463	0
				R-A-PHE-464	0
				R-A-ALA-465	0
				R-A-ASN-466	0
				R-A-THR-467	0
				R-A-THR-468	0
				R-A-ASN-469	0
				R-A-LEU-470	0
				R-A-THR-471	0
				R-A-PHE-472	0
				R-A-LEU-473	0
				R-A-LEU-475	0
				R-A-SER-476	0
				R-A-CYS-478	0
				R-A-GLN-479	0
				R-A-LEU-480	0
				R-A-GLN-482	0
				R-A-ILE-483	0
				R-A-SER-484	0
				R-A-TRP-485	0
				R-A-GLY-486	0
				R-A-VAL-487	0
				R-A-PHE-488	0
				R-A-THR-490	0
				R-A-LEU-491	0
				R-A-HIE-492	0
				R-A-LEU-494	0
				R-A-GLN-495	0
				R-A-LEU-496	0
				R-A-LEU-497	0
				R-A-ASN-498	0
				R-A-MET-499	0
				R-A-SER-500	0
				R-A-HIE-501	0
				R-A-ASN-502	0
				R-A-ASN-503	0
				R-A-LEU-504	0
				R-A-LEU-505	0
				R-A-PHE-506	0
				R-A-LEU-507	0
				R-A-SER-509	0
				R-A-SER-510	0
				R-A-HIE-511	0
				R-A-TYR-512	0
				R-A-ASN-513	0
				R-A-GLN-514	0
				R-A-LEU-515	0
				R-A-TYR-516	0
				R-A-SER-517	0
				R-A-LEU-518	0
				R-A-SER-519	0
				R-A-THR-520	0
				R-A-LEU-521	0
				R-A-CYS-523	0
				R-A-SER-524	0
				R-A-PHE-525	0
				R-A-ASN-526	0
				R-A-ILE-528	0
				R-A-THR-530	0
				R-A-SER-531	0
				R-A-GLY-533	0
				R-A-ILE-534	0
				R-A-LEU-535	0
				R-A-GLN-536	0
				R-A-HIE-537	0
				R-A-PHE-538	0
				R-A-PRO-539	0
				R-A-SER-541	0
				R-A-LEU-542	0
				R-A-ALA-543	0
				R-A-PHE-544	0
				R-A-PHE-545	0
				R-A-ASN-546	0
				R-A-LEU-547	0
				R-A-THR-548	0
				R-A-ASN-549	0
				R-A-ASN-550	0
				R-A-SER-551	0
				R-A-VAL-552	0
				R-A-ALA-553	0
				R-A-CYS-554	0
				R-A-ILE-555	0
				R-A-CYS-556	0
				R-A-HIE-558	0
				R-A-GLN-559	0
				R-A-PHE-561	0
				R-A-LEU-562	0
				R-A-GLN-563	0
				R-A-TRP-564	0
				R-A-VAL-565	0
				R-A-GLN-568	0
				R-A-GLN-570	0
				R-A-PHE-571	0
				R-A-LEU-572	0
				R-A-VAL-573	0
				R-A-ASN-574	0
				R-A-VAL-575	0
				R-A-GLN-577	0
				R-A-MET-578	0
				R-A-THR-579	0
				R-A-CYS-580	0
				R-A-SER-59	0.01
				R-A-THR-65	0.01
				R-A-ILE-87	0.01
				R-A-ASN-103	0.01
				R-A-VAL-105	0.01
				R-A-ALA-106	0.01
				R-A-VAL-107	0.01
				R-A-THR-109	0.01
				R-A-SER-116	0.01
				R-A-LEU-128	0.01
				R-A-VAL-130	0.01
				R-A-CYS-138	0.01
				R-A-HIE-152	0.01
				R-A-VAL-153	0.01
				R-A-THR-164	0.01
				R-A-SER-180	0.01
				R-A-LEU-181	0.01
				R-A-GLN-194	0.01
				R-A-LEU-220	0.01
				R-A-ILE-232	0.01
				R-A-GLY-252	0.01
				R-A-GLU-260	0.01
				R-A-LEU-263	0.01
				R-A-ALA-288	0.01
				R-A-VAL-290	0.01
				R-A-ASP-297	0.01
				R-A-GLN-313	0.01
				R-A-ASP-321	0.01
				R-A-THR-83	0.02
				R-A-ASN-85	0.02
				R-A-SER-89	0.02
				R-A-ASN-166	0.02
				R-A-ALA-195	0.02
				R-A-LEU-231	0.02
				R-A-SER-270	0.02
				R-A-ASP-272	0.02
				R-A-GLY-289	0.02
				R-A-SER-291	0.02
				R-A-GLU-296	0.02
				R-A-GLU-394	0.02
				R-A-GLU-395	0.02
				R-A-GLU-419	0.02
				R-A-ASP-489	0.02
				R-A-ASP-508	0.02
				R-A-GLU-557	0.02
				R-A-GLU-567	0.02
				R-A-GLU-52	0.03
				R-A-GLU-67	0.03
				R-A-ASP-68	0.03
				R-A-GLU-102	0.03
				R-A-ALA-112	0.03
				R-A-SER-113	0.03
				R-A-ALA-131	0.03
				R-A-ARG-172	0.03
				R-A-GLU-203	0.03
				R-A-LEU-204	0.03
				R-A-GLY-234	0.03
				R-A-ASP-271	0.03
				R-A-ASP-367	0.03
				R-A-ASP-400	0.03
				R-A-GLU-411	0.03
				R-A-ASP-425	0.03
				R-A-ASP-434	0.03
				R-A-ASP-436	0.03
				R-A-ASP-457	0.03
				R-A-ASP-474	0.03
				R-A-GLU-481	0.03
				R-A-ASP-522	0.03
				R-A-GLU-529	0.03
				R-A-GLU-576	0.03
				R-A-ALA-581	0.03
				R-A-GLU-4	0.04
				R-A-ASP-23	0.04
				R-A-ASP-24	0.04
				R-A-GLY-84	0.04
				R-A-LYS-139	0.04
				R-A-ASP-182	0.04
				R-A-LEU-206	0.04
				R-A-THR-264	0.04
				R-A-ASP-351	0.04
				R-A-ASP-377	0.04
				R-A-THR-162	0.05
				R-A-LEU-233	0.05
				R-A-ASP-33	0.06
				R-A-ASN-129	0.06
				R-A-SER-137	0.06
				R-A-SER-248	0.06
				R-A-ASP-57	0.07
				R-A-HIE-132	0.07
				R-A-THR-205	0.07
				R-A-GLU-246	0.07
				R-A-ASP-154	0.08
				R-A-ASN-222	0.08
				R-A-GLU-235	0.08
				R-A-ASP-15	0.09
				R-A-SER-156	0.09
				R-A-GLN-221	0.09
				R-A-GLN-88	0.1
				R-A-GLU-64	0.11
				R-A-GLU-239	0.11
				R-A-THR-218	0.12
				R-A-THR-266	0.12
				R-A-GLU-62	0.13
				R-A-ASN-158	0.13
				R-A-ASN-133	0.17
				R-A-SER-184	0.17
				R-A-ASN-267	0.17
				R-A-ASP-268	0.18
				R-A-ASN-186	0.19
				R-A-LEU-242	0.19
				R-A-GLN-161	0.21
				R-A-HIE-136	0.25
				R-A-ARG-207	0.26
				R-A-PHE-210	0.31
				R-A-LYS-110	0.34
				R-A-LYS-217	0.37
				R-A-GLU-108	0.46
				R-A-ARG-240	1.54
