# Supplementary material for: Type 1 piliated uropathogenic Escherichia coli hijack the host immune response by binding to CD14
Source: eLife. 2022 Jul 26;11:e78995. doi: 10.7554/eLife.78995 (PMC9359703; doi:10.7554/eLife.78995)
Supplement: Supplementary file 4. [file elife-78995-supp4.xlsx]

## Sheet: binding energy
Table S3. Amino acids of FimH responsible for binding mouse CD14 and mannose, and amino acids of mouse CD14 responsible for FimH and LPS binding.
Amino acids found repsonsible for binding of FimH to CD14, but also known for mannose and LPS binding, are highlited.
FimH		CD14
CD14 binding	mannose binding	FimH binding	LPS binding
ARG-98	PHE-1	ASN-255	ASP-5
THR-99	ASN-46	VAL-274	GLU-6
TYR-48	ASP-47	THR-97	GLU-7
ILE-13	ASP-54	SER-253	SER-8
PRO-12	GLN-133	ASP-175	PRO-16
PHE-142	ASN-135	SER-257	LYS-17
SER-139	ASP-140	VAL-201	PRO-18
GLN-143	PHE-142	ILE-121	ASP-19
SER-17	TYR-48	SER-278	ALA-29
SER-97	ILE-52	GLN-94	ALA-30
GLU-50	TYR-137	GLY-228	ASP-31
GLY-15	ILE-13	VAL-149	VAL-32
TYR-137		ASN-296	GLU-33
ASN-96		ARG-68	ALA-52
ALA-10		PHE-258	ASP-53
GLY-14		GLN-200	LEU-54
PRO-49		TYR-279	GLY-55
PHE-144		SER-232	GLN-56
LYS-76		THR-173	PHE-57
HIE-45		LEU-229
ASN-138		ALA-203
ARG-92		LEU-96
ALA-2		SER-298
LYS-189		LEU-275
ARG-60		SER-151
ARG-166		LEU-254
LYS-121		ASN-252
ARG-132		LEU-256
ILE-52		LYS-148
GLY-16		LEU-202
ARG-227		SER-177
VAL-145		GLN-227
TRP-146		LEU-231
ARG-258		ASN-120
ILE-11		ASN-123
ALA-18		SER-172
ILE-130		HIE-233
TRP-103		LEU-277
LEU-131		LEU-69
TYR-55		LEU-122
PRO-102		LEU-150
PRO-104		LEU-174
ILE-148		LEU-176
CYS-3		LEU-204
VAL-20		ARG-185
VAL-22		ARG-237
ASN-29		LYS-262
LEU-34		LEU-124
LEU-38		ARG-132
TYR-82		ARG-281
PHE-84		ILE-152
TYR-108		LYS-266
GLY-117		LEU-297
		ARG-75
		ARG-166
		ARG-223
		ARG-39
		LYS-46
		ARG-79
		ARG-86
		LEU-98
		ALA-153
		LYS-17
		ARG-47
		LYS-62
		LYS-195
		SER-273
		ARG-284
		ALA-30
		PRO-1
		PRO-180
		ARG-205
		TRP-247
		LEU-261
		LEU-299
		GLY-301
		LEU-4
		LEU-34
		ALA-73
		TRP-129
		TRP-135
		LEU-158
		PHE-160
		ILE-188
		PRO-212
		SER-213
		ALA-220
		LEU-282
		PRO-303
		PHE-304
