# Supplementary material for: Type 1 piliated uropathogenic Escherichia coli hijack the host immune response by binding to CD14
Source: eLife. 2022 Jul 26;11:e78995. doi: 10.7554/eLife.78995 (PMC9359703; doi:10.7554/eLife.78995)
Supplement: Supplementary file 5. [file elife-78995-supp5.xlsx]

## Sheet: binding energy
Table S4. Predicted free binding energy of human CD14 and FimH.
CD14-FimH -55.95 kcal/mol
CD14 4GLP monomer		FimH 6GTV
residue	energy (kcal/mol)	residue	energy (kcal/mol)
R-A-ARG-283	-10.73	L-B-SER-17	-4.47
R-A-PRO-305	-3.59	L-B-ILE-13	-3.63
R-A-ASP-178	-3.26	L-B-PRO-12	-3.48
R-A-HIE-233	-2.75	L-B-ASP-54	-3.16
R-A-SER-281	-2.73	L-B-PHE-142	-3.05
R-A-PRO-180	-2.51	L-B-ASN-138	-2.93
R-A-PHE-260	-2.48	L-B-VAL-67	-2.18
R-A-ASN-126	-1.74	L-B-ASP-140	-2.16
R-A-GLN-154	-1.67	L-B-TYR-137	-2.02
R-A-GLY-38	-1.52	L-B-GLY-16	-1.85
R-A-SER-235	-1.29	L-B-GLY-14	-1.39
R-A-ASN-282	-1.27	L-B-TYR-149	-1.26
R-A-VAL-308	-1.25	L-B-ILE-52	-1.22
R-A-GLY-262	-0.87	L-B-LEU-125	-1.18
R-A-SER-14	-0.64	L-B-TYR-21	-1.11
R-A-ALA-261	-0.63	L-B-ILE-11	-0.99
R-A-ASN-206	-0.62	L-B-SER-69	-0.87
R-A-ASN-234	-0.54	L-B-ALA-18	-0.86
R-A-ALA-73	-0.39	L-B-TYR-48	-0.8
R-A-LEU-263	-0.29	L-B-ARG-60	-0.49
R-A-LEU-39	-0.23	L-B-SER-139	-0.45
R-A-SER-259	-0.21	L-B-ARG-132	-0.44
R-A-PRO-16	-0.17	L-B-ARG-166	-0.4
R-A-GLY-208	-0.14	L-B-LYS-76	-0.39
R-A-PHE-306	-0.14	L-B-LYS-189	-0.37
R-A-LEU-231	-0.11	L-B-ARG-92	-0.36
R-A-ALA-74	-0.1	L-B-GLY-15	-0.32
R-A-LEU-236	-0.1	L-B-PHE-144	-0.32
R-A-ARG-133	-0.08	L-B-LYS-101	-0.3
R-A-ARG-246	-0.08	L-B-ALA-122	-0.27
R-A-LYS-273	-0.08	L-B-VAL-145	-0.27
R-A-ARG-275	-0.08	L-B-ARG-227	-0.27
R-A-LEU-279	-0.08	L-B-ARG-98	-0.22
R-A-VAL-127	-0.07	L-B-LYS-4	-0.2
R-A-ARG-185	-0.07	L-B-ARG-258	-0.19
R-A-LYS-195	-0.07	L-B-TRP-146	-0.18
R-A-LYS-268	-0.07	L-B-GLY-66	-0.13
R-A-LEU-41	-0.06	L-B-ALA-2	-0.12
R-A-ARG-86	-0.06	L-B-THR-9	-0.12
R-A-LYS-148	-0.06	L-B-LYS-121	-0.11
R-A-ARG-166	-0.06	L-B-ILE-126	-0.11
R-A-PRO-309	-0.06	L-B-ILE-148	-0.11
R-A-ARG-47	-0.05	L-B-VAL-118	-0.1
R-A-ARG-67	-0.05	L-B-VAL-128	-0.09
R-A-ARG-68	-0.05	L-B-ASN-19	-0.08
R-A-ARG-92	-0.05	L-B-VAL-20	-0.08
R-A-LYS-94	-0.05	L-B-ILE-120	-0.08
R-A-LYS-144	-0.05	L-B-PRO-49	-0.06
R-A-PRO-158	-0.05	L-B-LEU-68	-0.04
R-A-GLU-264	-0.05	L-B-ILE-42	-0.03
R-A-LYS-46	-0.04	L-B-SER-70	-0.03
R-A-ARG-55	-0.04	L-B-TRP-103	-0.03
R-A-LYS-62	-0.04	L-B-LEU-109	-0.03
R-A-ARG-65	-0.04	L-B-ALA-127	-0.03
R-A-PRO-77	-0.04	L-B-CYS-3	-0.02
R-A-PRO-18	-0.03	L-B-VAL-22	-0.02
R-A-PRO-212	-0.03	L-B-LEU-38	-0.02
R-A-LEU-307	-0.03	L-B-TYR-55	-0.02
R-A-PRO-43	-0.02	L-B-PHE-84	-0.02
R-A-LEU-258	-0.02	L-B-PRO-85	-0.02
R-A-ALA-78	-0.01	L-B-ILE-130	-0.02
R-A-LEU-85	-0.01	L-B-LEU-131	-0.02
R-A-ILE-103	-0.01	L-B-LEU-24	-0.01
R-A-TRP-135	-0.01	L-B-PRO-26	-0.01
R-A-LEU-136	-0.01	L-B-VAL-28	-0.01
R-A-LEU-187	-0.01	L-B-ASN-29	-0.01
R-A-MET-209	-0.01	L-B-VAL-56	-0.01
R-A-LEU-219	-0.01	L-B-PHE-71	-0.01
R-A-VAL-240	-0.01	L-B-TYR-77	-0.01
R-A-TRP-249	-0.01	L-B-ASN-78	-0.01
R-A-PRO-267	-0.01	L-B-GLY-79	-0.01
R-A-PRO-288	-0.01	L-B-TYR-82	-0.01
R-A-LEU-2	0	L-B-PRO-104	-0.01
R-A-PHE-7	0	L-B-LEU-107	-0.01
R-A-SER-21	0	L-B-GLY-160	-0.01
R-A-ALA-23	0	L-B-LEU-183	-0.01
R-A-PHE-24	0	L-B-VAL-185	-0.01
R-A-CYS-26	0	L-B-CYS-187	-0.01
R-A-VAL-27	0	L-B-ALA-188	-0.01
R-A-SER-28	0	L-B-GLN-191	-0.01
R-A-ALA-29	0	L-B-LEU-193	-0.01
R-A-VAL-30	0	L-B-TYR-195	-0.01
R-A-LEU-45	0	L-B-PHE-209	-0.01
R-A-VAL-48	0	L-B-PRO-217	-0.01
R-A-ALA-50	0	L-B-GLY-222	-0.01
R-A-ALA-52	0	L-B-GLN-224	-0.01
R-A-PRO-54	0	L-B-ALA-234	-0.01
R-A-GLN-56	0	L-B-THR-237	-0.01
R-A-TYR-57	0	L-B-ALA-247	-0.01
R-A-ALA-58	0	L-B-LEU-252	-0.01
R-A-THR-60	0	L-B-GLY-273	-0.01
R-A-VAL-61	0	L-B-VAL-277	-0.01
R-A-ALA-63	0	L-B-ALA-25	0
R-A-LEU-64	0	L-B-VAL-30	0
R-A-VAL-66	0	L-B-GLN-32	0
R-A-VAL-76	0	L-B-SER-39	0
R-A-LEU-81	0	L-B-PHE-43	0
R-A-VAL-82	0	L-B-THR-57	0
R-A-GLY-83	0	L-B-VAL-75	0
R-A-ALA-84	0	L-B-SER-80	0
R-A-VAL-87	0	L-B-SER-81	0
R-A-LEU-88	0	L-B-PRO-83	0
R-A-ALA-89	0	L-B-PRO-102	0
R-A-TYR-90	0	L-B-VAL-105	0
R-A-SER-91	0	L-B-TYR-108	0
R-A-LEU-93	0	L-B-SER-113	0
R-A-MET-107	0	L-B-SER-114	0
R-A-PRO-108	0	L-B-ALA-115	0
R-A-PRO-109	0	L-B-GLY-116	0
R-A-LEU-110	0	L-B-LEU-129	0
R-A-PRO-111	0	L-B-ALA-150	0
R-A-LEU-112	0	L-B-THR-158	0
R-A-ALA-114	0	L-B-GLY-159	0
R-A-THR-115	0	L-B-VAL-170	0
R-A-GLY-116	0	L-B-THR-171	0
R-A-LEU-117	0	L-B-LEU-172	0
R-A-ALA-118	0	L-B-PRO-173	0
R-A-LEU-119	0	L-B-TYR-175	0
R-A-SER-120	0	L-B-PRO-176	0
R-A-SER-134	0	L-B-GLY-177	0
R-A-ALA-137	0	L-B-SER-178	0
R-A-LEU-139	0	L-B-VAL-179	0
R-A-GLN-140	0	L-B-PRO-180	0
R-A-GLN-141	0	L-B-ILE-181	0
R-A-TRP-142	0	L-B-PRO-182	0
R-A-LEU-143	0	L-B-TYR-186	0
R-A-PRO-145	0	L-B-ASN-192	0
R-A-GLY-146	0	L-B-GLY-194	0
R-A-LEU-147	0	L-B-LEU-197	0
R-A-PHE-160	0	L-B-GLY-199	0
R-A-SER-161	0	L-B-THR-201	0
R-A-CYS-162	0	L-B-ALA-202	0
R-A-GLN-164	0	L-B-ALA-204	0
R-A-VAL-165	0	L-B-GLY-205	0
R-A-ALA-167	0	L-B-ASN-206	0
R-A-PHE-168	0	L-B-SER-207	0
R-A-PRO-169	0	L-B-ILE-208	0
R-A-ALA-170	0	L-B-ALA-213	0
R-A-LEU-171	0	L-B-PHE-215	0
R-A-THR-172	0	L-B-SER-216	0
R-A-GLY-181	0	L-B-ALA-218	0
R-A-MET-188	0	L-B-GLN-219	0
R-A-ALA-189	0	L-B-GLY-220	0
R-A-LEU-191	0	L-B-VAL-221	0
R-A-CYS-192	0	L-B-VAL-223	0
R-A-PRO-193	0	L-B-LEU-225	0
R-A-HIE-194	0	L-B-THR-226	0
R-A-PHE-196	0	L-B-ASN-228	0
R-A-PRO-197	0	L-B-GLY-229	0
R-A-ALA-198	0	L-B-THR-230	0
R-A-ILE-199	0	L-B-ILE-231	0
R-A-GLN-200	0	L-B-ILE-232	0
R-A-THR-213	0	L-B-PRO-233	0
R-A-VAL-215	0	L-B-ASN-236	0
R-A-CYS-216	0	L-B-VAL-238	0
R-A-ALA-217	0	L-B-SER-239	0
R-A-ALA-218	0	L-B-LEU-240	0
R-A-ALA-220	0	L-B-GLY-241	0
R-A-ALA-221	0	L-B-ALA-242	0
R-A-ALA-222	0	L-B-VAL-243	0
R-A-GLY-223	0	L-B-GLY-244	0
R-A-VAL-224	0	L-B-THR-245	0
R-A-GLN-225	0	L-B-SER-246	0
R-A-PRO-226	0	L-B-VAL-248	0
R-A-HIE-227	0	L-B-SER-249	0
R-A-PRO-242	0	L-B-LEU-250	0
R-A-SER-243	0	L-B-GLY-251	0
R-A-ALA-244	0	L-B-THR-253	0
R-A-PRO-245	0	L-B-ALA-254	0
R-A-CYS-247	0	L-B-ASN-255	0
R-A-MET-248	0	L-B-TYR-256	0
R-A-SER-250	0	L-B-ALA-257	0
R-A-SER-251	0	L-B-THR-259	0
R-A-ALA-252	0	L-B-GLY-260	0
R-A-LEU-253	0	L-B-GLY-261	0
R-A-ASN-254	0	L-B-GLN-262	0
R-A-GLY-269	0	L-B-VAL-263	0
R-A-LEU-270	0	L-B-THR-264	0
R-A-PRO-271	0	L-B-ALA-265	0
R-A-ALA-272	0	L-B-GLY-266	0
R-A-LEU-274	0	L-B-ASN-267	0
R-A-ARG-286	0	L-B-VAL-268	0
R-A-PRO-290	0	L-B-SER-270	0
R-A-LEU-293	0	L-B-ILE-271	0
R-A-PRO-294	0	L-B-ILE-272	0
R-A-VAL-296	0	L-B-THR-275	0
R-A-GLN-25	0.01	L-B-TYR-278	0
R-A-VAL-32	0.01	L-B-ALA-27	0.01
R-A-ILE-34	0.01	L-B-GLY-31	0.01
R-A-PHE-44	0.01	L-B-ASN-33	0.01
R-A-LEU-69	0.01	L-B-VAL-36	0.01
R-A-GLN-79	0.01	L-B-CYS-44	0.01
R-A-LEU-80	0.01	L-B-LEU-58	0.01
R-A-LEU-96	0.01	L-B-ALA-63	0.01
R-A-THR-104	0.01	L-B-GLY-73	0.01
R-A-GLY-105	0.01	L-B-THR-86	0.01
R-A-THR-106	0.01	L-B-SER-88	0.01
R-A-SER-121	0.01	L-B-THR-90	0.01
R-A-ALA-130	0.01	L-B-PRO-91	0.01
R-A-VAL-149	0.01	L-B-VAL-93	0.01
R-A-SER-173	0.01	L-B-ALA-106	0.01
R-A-LEU-182	0.01	L-B-VAL-156	0.01
R-A-ALA-190	0.01	L-B-PRO-157	0.01
R-A-THR-207	0.01	L-B-CYS-161	0.01
R-A-GLY-214	0.01	L-B-VAL-163	0.01
R-A-VAL-276	0.01	L-B-SER-164	0.01
R-A-GLN-289	0.01	L-B-ALA-165	0.01
R-A-LEU-122	0.02	L-B-VAL-168	0.01
R-A-GLY-132	0.02	L-B-THR-169	0.01
R-A-LEU-150	0.02	L-B-THR-184	0.01
R-A-ALA-159	0.02	L-B-SER-190	0.01
R-A-LEU-174	0.02	L-B-TYR-196	0.01
R-A-GLY-186	0.02	L-B-SER-198	0.01
R-A-ASN-201	0.02	L-B-THR-200	0.01
R-A-SER-228	0.02	L-B-THR-210	0.01
R-A-ARG-237	0.02	L-B-ASN-211	0.01
R-A-ALA-238	0.02	L-B-THR-212	0.01
R-A-SER-255	0.02	L-B-SER-214	0.01
R-A-VAL-266	0.02	L-B-GLN-269	0.01
R-A-ALA-287	0.02	L-B-VAL-274	0.01
R-A-ASN-298	0.02	L-B-PHE-276	0.01
R-A-LEU-299	0.02	L-B-LEU-34	0.02
R-A-ASP-6	0.03	L-B-THR-40	0.02
R-A-TRP-20	0.03	L-B-THR-74	0.02
R-A-TRP-129	0.03	L-B-THR-87	0.02
R-A-THR-131	0.03	L-B-SER-97	0.02
R-A-LEU-202	0.03	L-B-THR-99	0.02
R-A-THR-239	0.03	L-B-PRO-111	0.02
R-A-ASN-241	0.03	L-B-VAL-112	0.02
R-A-LEU-277	0.03	L-B-SER-124	0.02
R-A-ARG-8	0.04	L-B-VAL-155	0.02
R-A-CYS-9	0.04	L-B-ASN-235	0.02
R-A-ASP-53	0.04	L-B-THR-5	0.03
R-A-ASP-59	0.04	L-B-SER-72	0.03
R-A-LEU-98	0.04	L-B-VAL-94	0.03
R-A-GLY-183	0.04	L-B-TYR-95	0.03
R-A-LEU-204	0.04	L-B-THR-110	0.03
R-A-LEU-229	0.04	L-B-VAL-154	0.03
R-A-LEU-256	0.04	L-B-ASN-23	0.04
R-A-LEU-301	0.04	L-B-VAL-35	0.04
R-A-ASP-4	0.05	L-B-SER-62	0.04
R-A-GLU-5	0.05	L-B-ASN-96	0.04
R-A-ASN-40	0.05	L-B-ALA-6	0.05
R-A-ASP-51	0.05	L-B-GLN-41	0.05
R-A-THR-70	0.05	L-B-GLN-59	0.05
R-A-GLU-113	0.05	L-B-GLY-123	0.06
R-A-ASN-257	0.05	L-B-THR-134	0.06
R-A-GLN-265	0.05	L-B-ASN-136	0.07
R-A-THR-300	0.05	L-B-THR-53	0.08
R-A-CYS-11	0.06	L-B-ASN-152	0.08
R-A-ASP-49	0.06	L-B-HIE-45	0.09
R-A-THR-97	0.06	L-B-GLY-61	0.09
R-A-SER-151	0.06	L-B-GLY-117	0.11
R-A-LEU-176	0.06	L-B-ASN-46	0.14
R-A-VAL-10	0.07	L-B-ASN-7	0.16
R-A-ARG-123	0.07	L-B-ALA-119	0.17
R-A-GLU-163	0.07	L-B-THR-51	0.18
R-A-THR-211	0.07	L-B-ASN-147	0.18
R-A-SER-280	0.07	L-B-TYR-64	0.19
R-A-VAL-71	0.08	L-B-ALA-10	0.2
R-A-GLU-95	0.08	L-B-ASP-174	0.2
R-A-ALA-203	0.08	L-B-ASN-151	0.21
R-A-GLU-295	0.08	L-B-GLN-143	0.22
R-A-ASP-19	0.09	L-B-GLY-8	0.23
R-A-GLU-138	0.09	L-B-GLY-65	0.25
R-A-ILE-152	0.09	L-B-ASP-203	0.26
R-A-ASP-297	0.09	L-B-GLN-279	0.34
R-A-LEU-101	0.1	L-B-GLU-50	0.38
R-A-LEU-124	0.1	L-B-ASN-135	0.4
R-A-ASP-291	0.1	L-B-ASP-37	0.42
R-A-GLU-31	0.11	L-B-ASP-162	0.42
R-A-ALA-153	0.11	L-B-ASP-167	0.46
R-A-LEU-284	0.12	L-B-ASP-47	0.5
R-A-ASN-285	0.12	L-B-ASP-100	0.52
R-A-GLU-22	0.13	L-B-GLU-89	0.55
R-A-SER-128	0.13	L-B-ASP-141	0.66
R-A-ALA-155	0.13	L-B-GLN-133	0.69
R-A-SER-157	0.13	L-B-ASP-153	0.75
R-A-ARG-205	0.14	L-B-PHE-1	2.78
R-A-SER-232	0.14
R-A-ASP-175	0.15
R-A-GLN-17	0.16
R-A-ASN-179	0.16
R-A-ASP-230	0.16
R-A-ASP-3	0.17
R-A-GLY-303	0.17
R-A-GLU-184	0.18
R-A-GLU-42	0.19
R-A-HIE-156	0.19
R-A-ASN-12	0.2
R-A-PHE-13	0.21
R-A-GLU-292	0.21
R-A-GLN-75	0.26
R-A-ASP-278	0.31
R-A-GLY-310	0.32
R-A-LYS-102	0.33
R-A-GLU-210	0.35
R-A-GLU-33	0.36
R-A-ASP-302	0.36
R-A-HIE-35	0.37
R-A-GLY-72	0.38
R-A-ALA-36	0.42
R-A-SER-177	0.45
R-A-ASN-304	0.72
R-A-GLU-99	0.74
R-A-GLU-1	0.75
R-A-GLU-15	0.75
R-A-GLY-37	1.21
R-A-ARG-125	1.46
R-A-ASP-100	2.46
