# Supplementary figures and images for: Type 1 piliated uropathogenic Escherichia coli hijack the host immune response by binding to CD14
Source: eLife journal article supplement (doi:10.7554/elife.78995), 2022-07-20

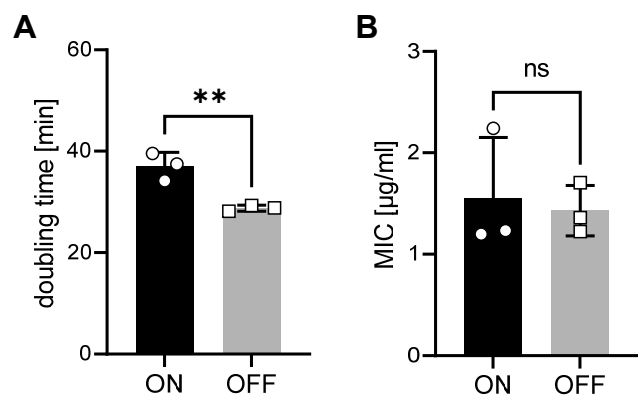

Supplement: supp [file elife-78995-supp-v1.zip]

**A**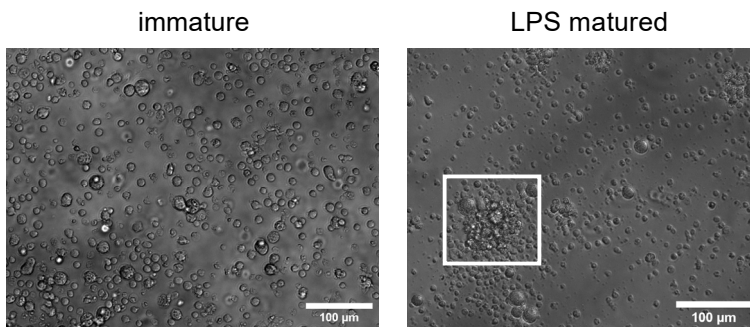**B**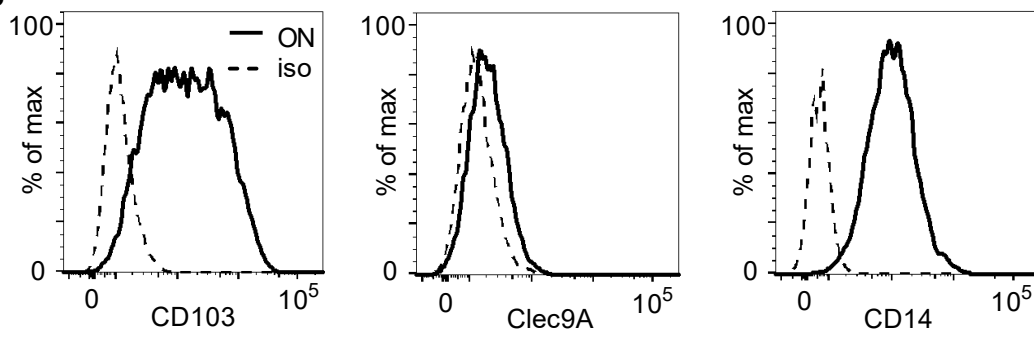**C**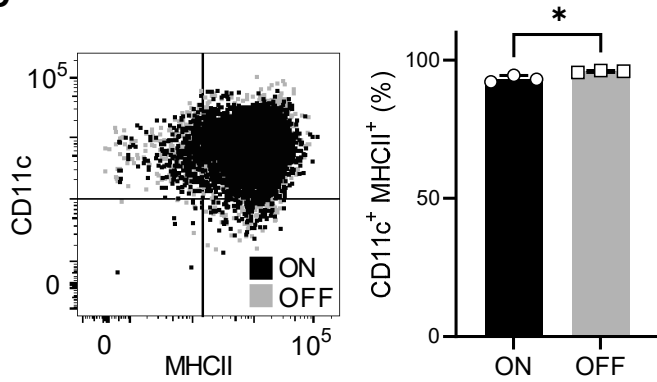**D**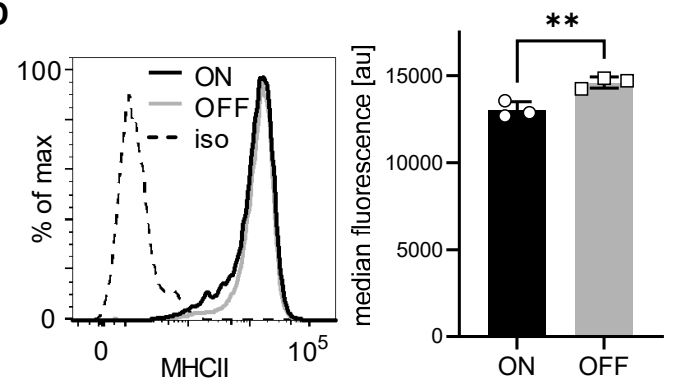

Supplement: supp [file elife-78995-supp-v1.zip]

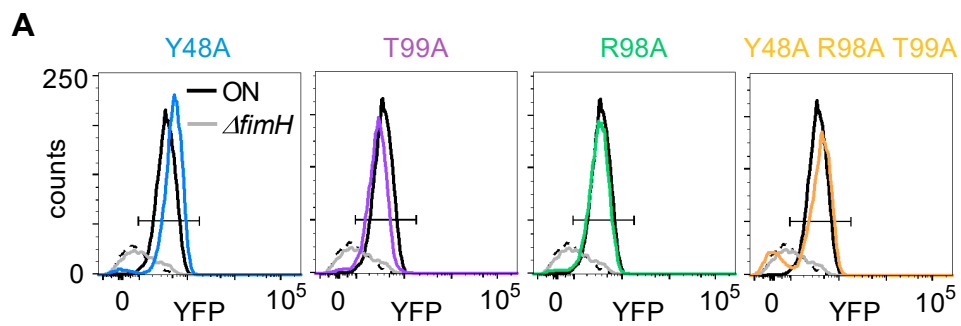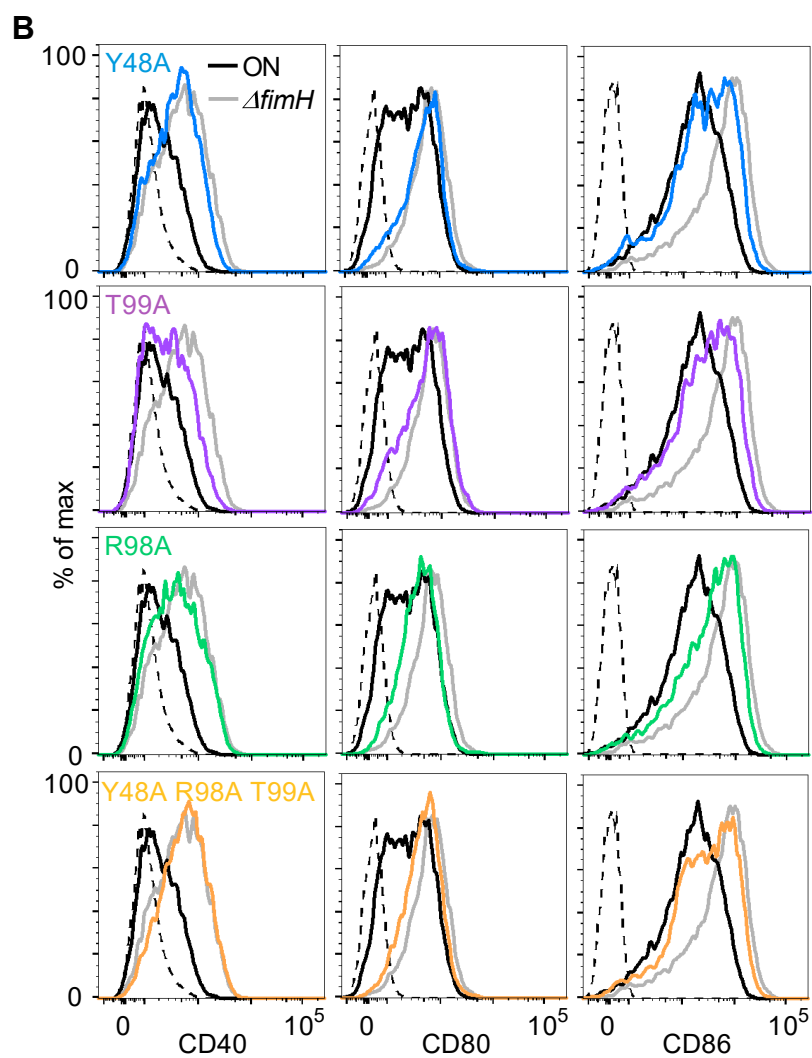

Supplement: supp [file elife-78995-supp-v1.zip]

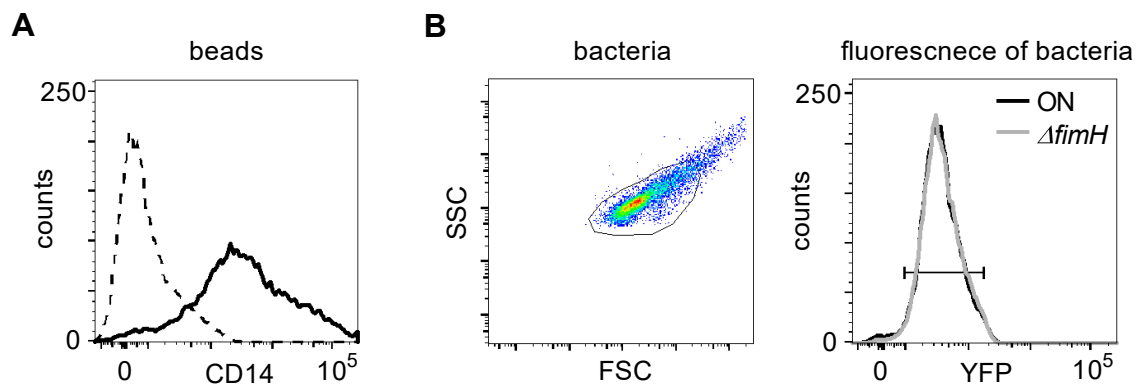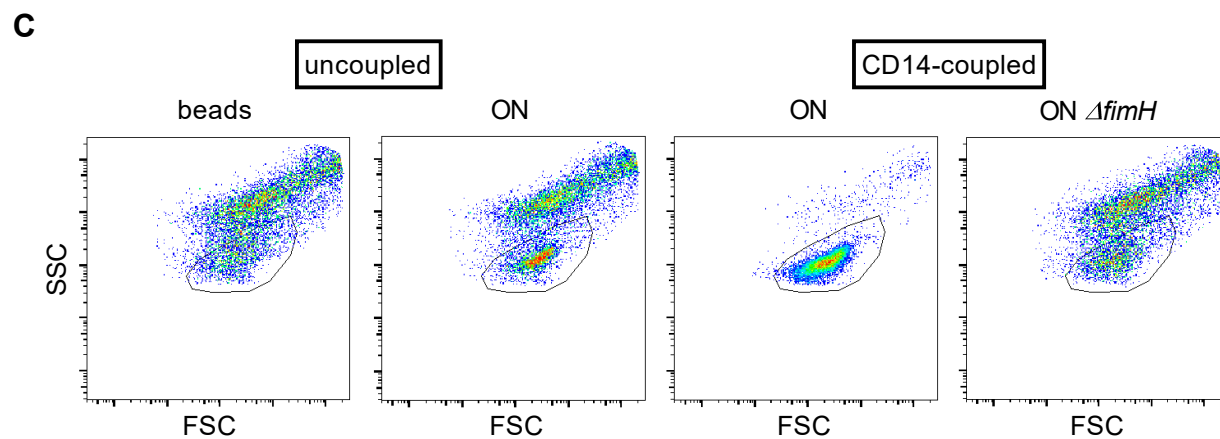

Supplement: supp [file elife-78995-supp-v1.zip]

**A**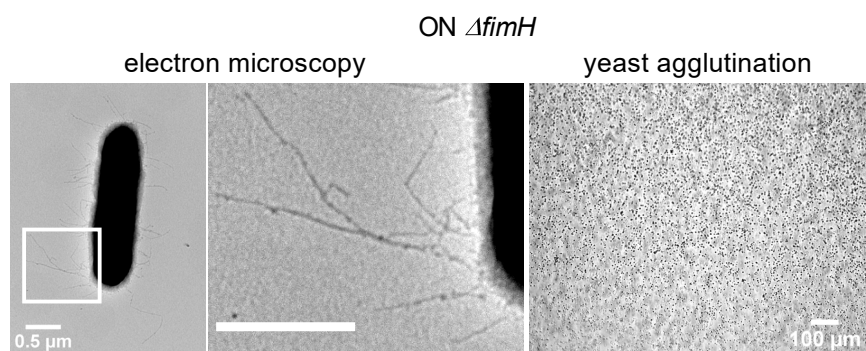**B**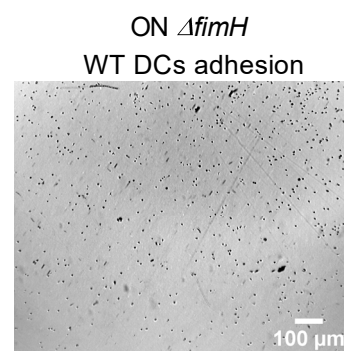**C**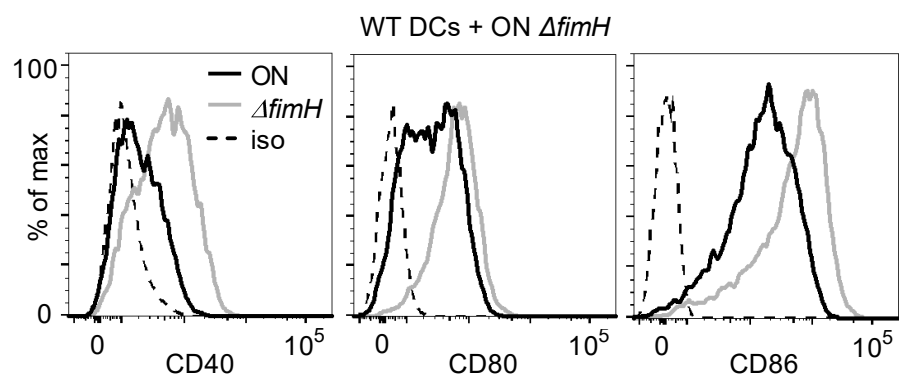**D**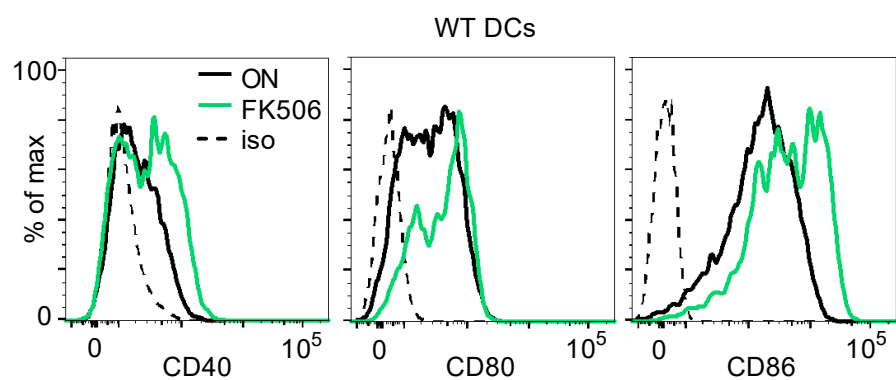

Supplement: supp [file elife-78995-supp-v1.zip]

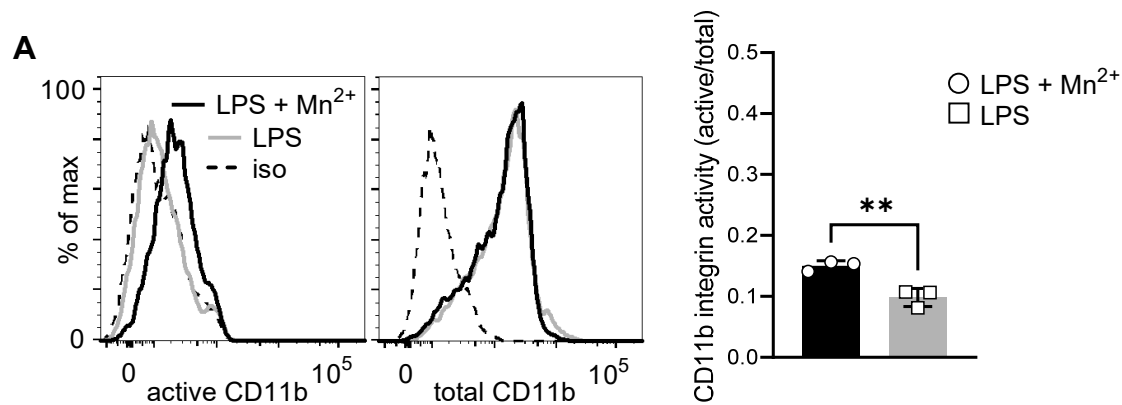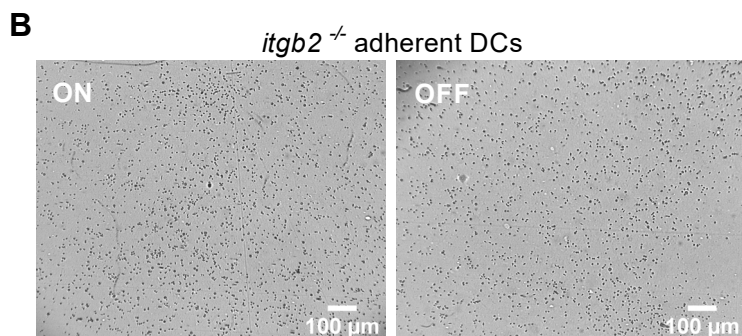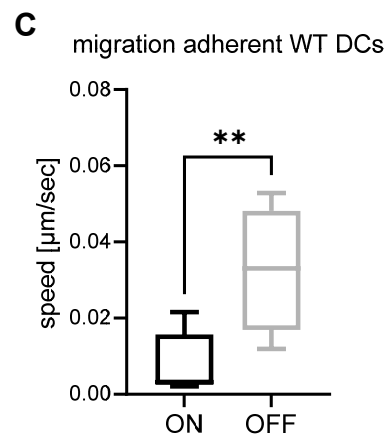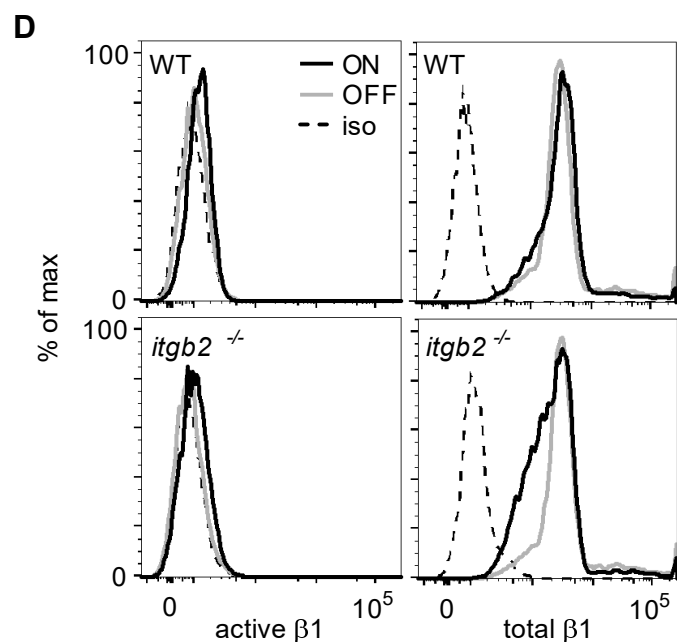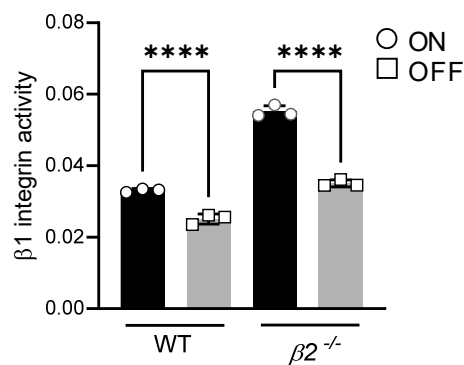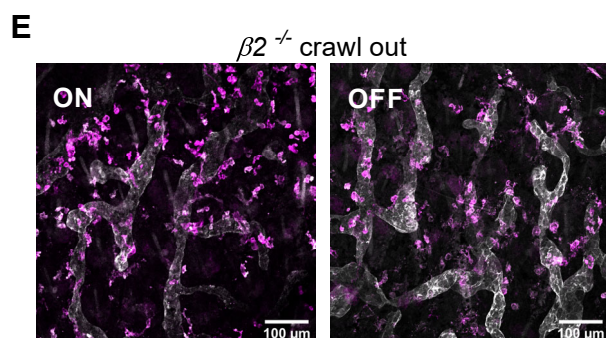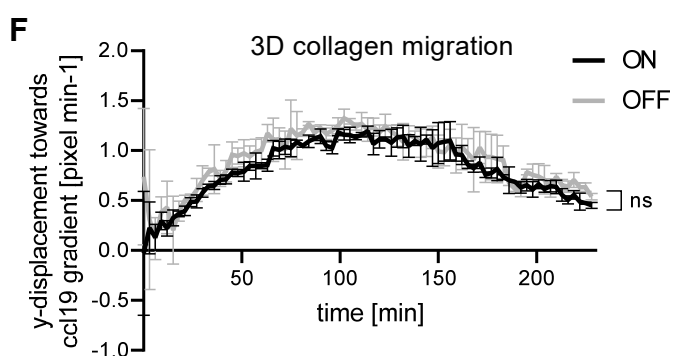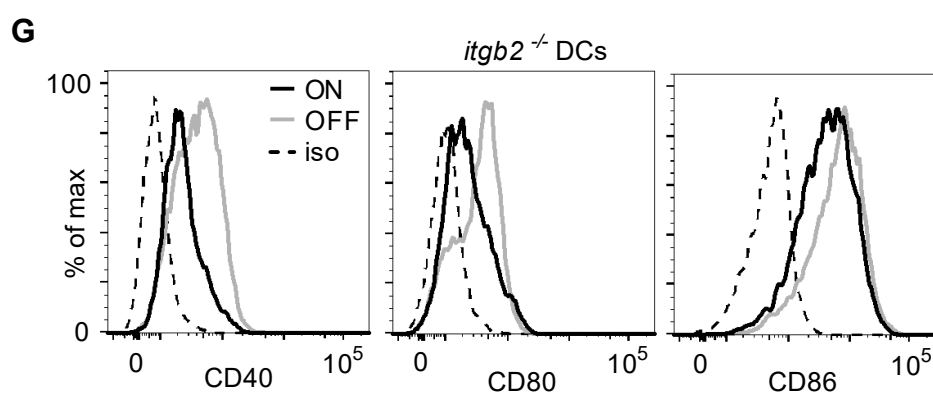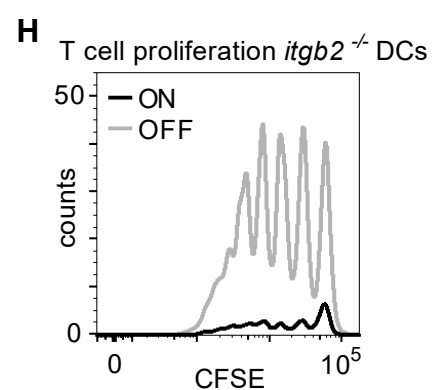

Supplement: supp [file elife-78995-supp-v1.zip]

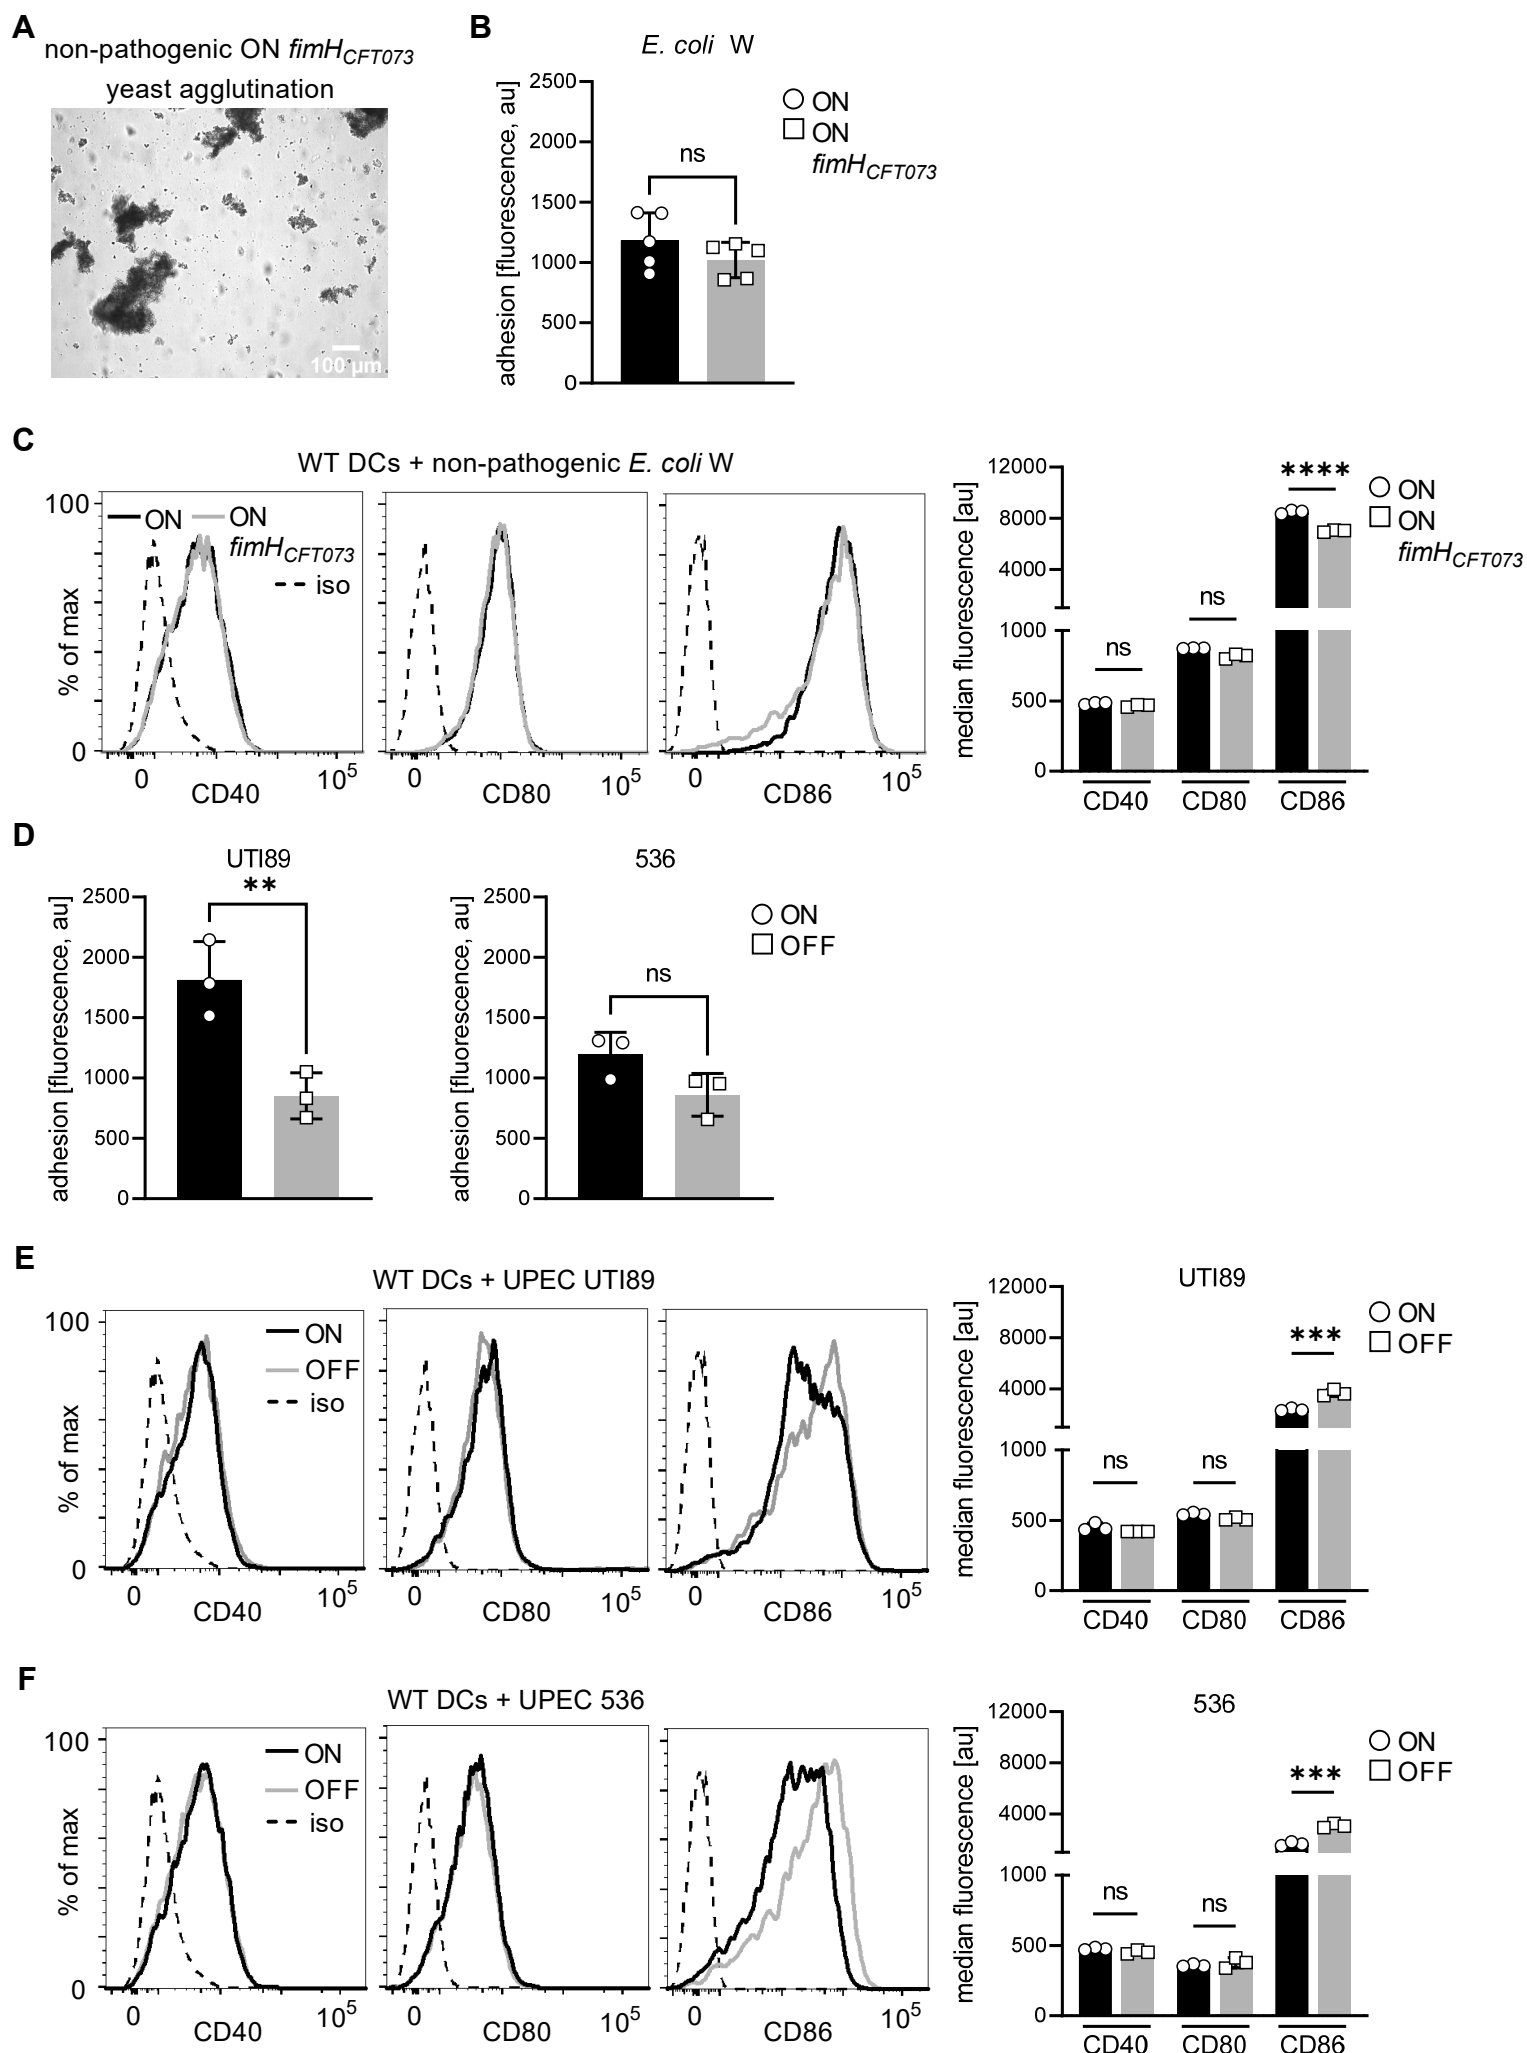

Supplement: supp [file elife-78995-supp-v1.zip]

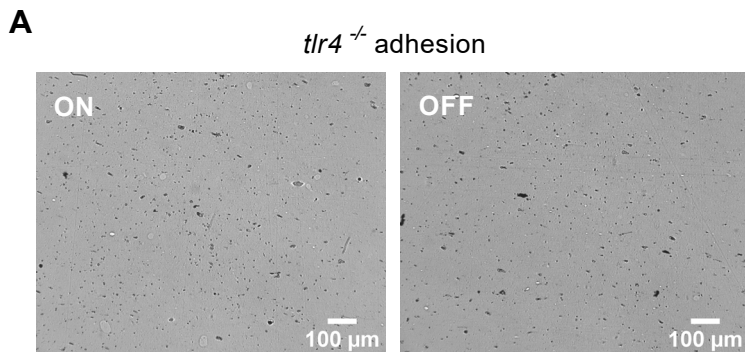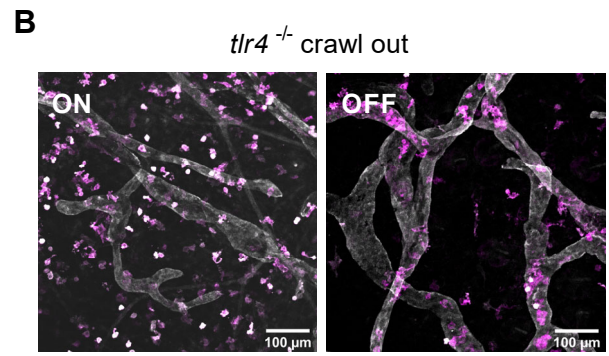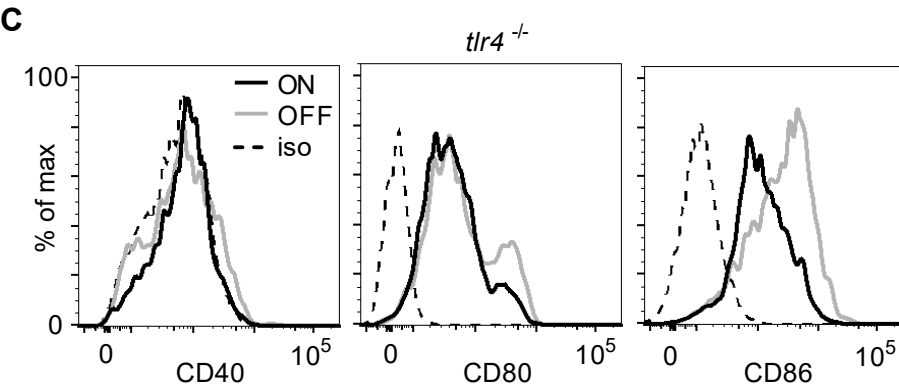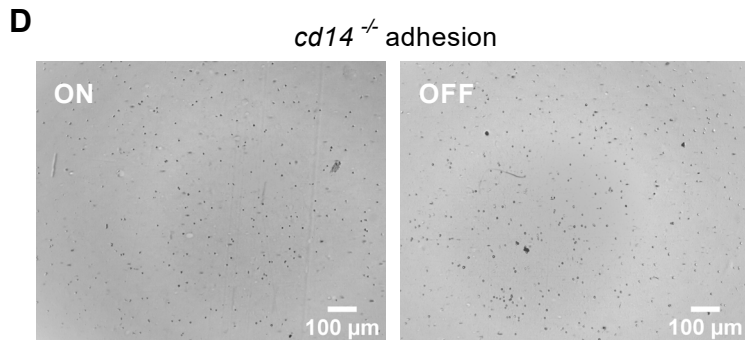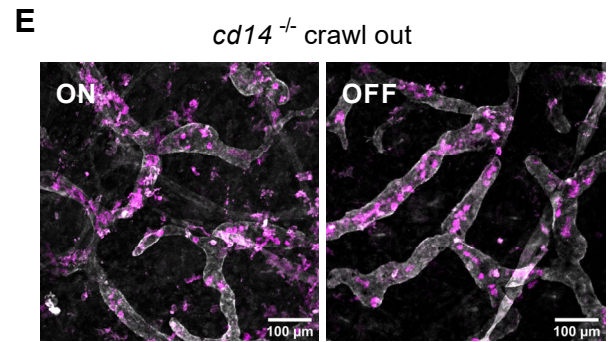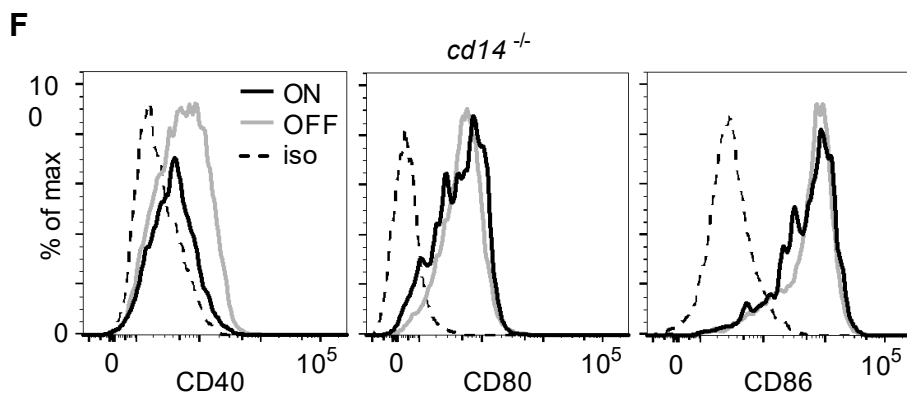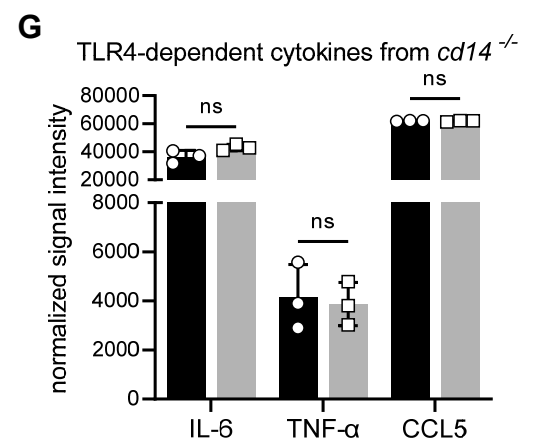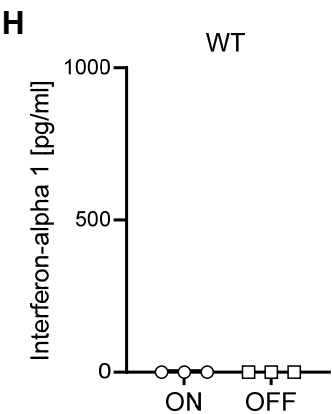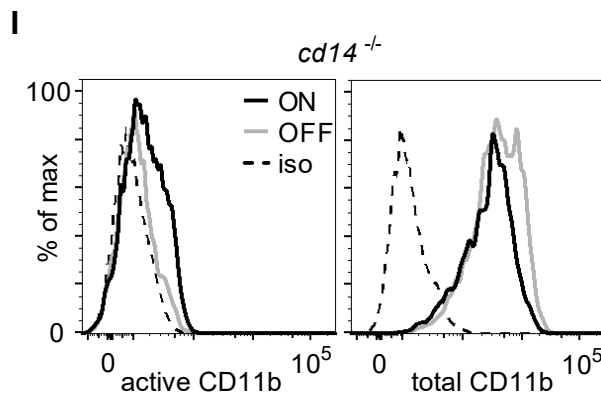

Supplement: supp [file elife-78995-supp-v1.zip]

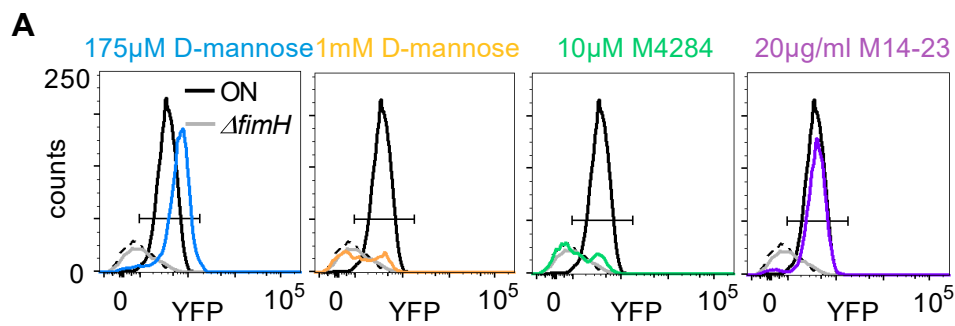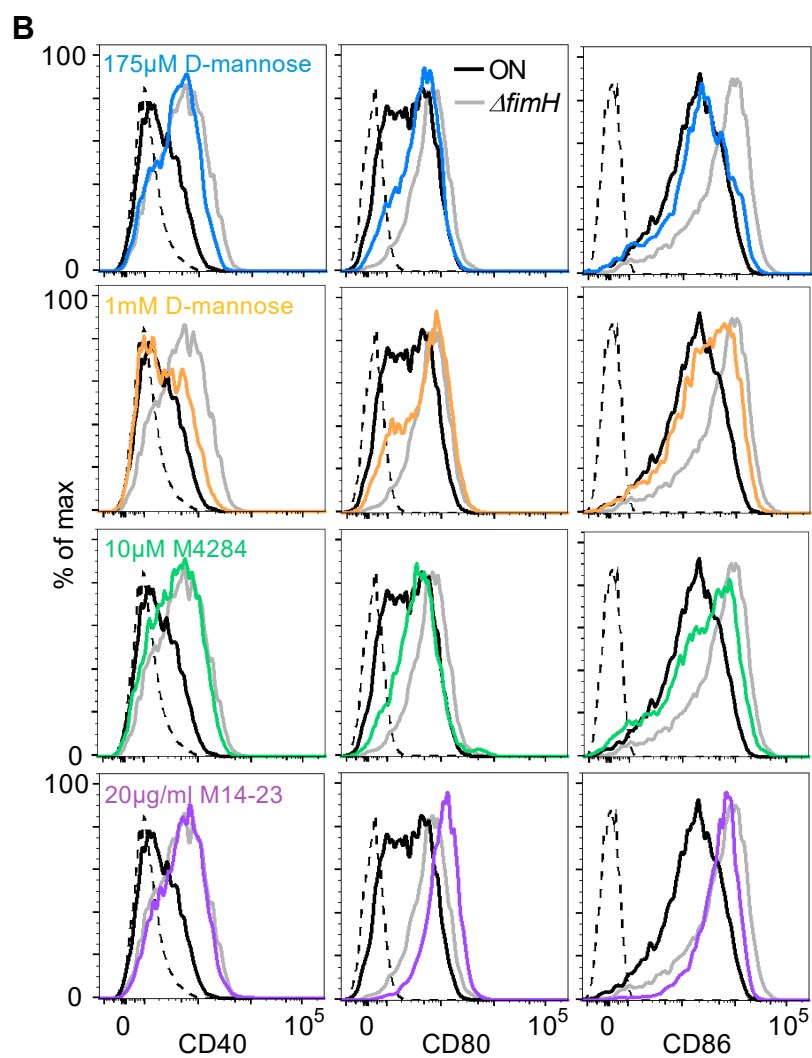

Supplement: supp [file elife-78995-supp-v1.zip]
